# Supplementary material
Source: MDPI journal article supplement (https://www.mdpi.com/1424-8247/15/8/998)

# Improving aqueous solubility and in vitro pharmacokinetic properties of the 3-nitroimidazo[1,2-*a*]pyridine antileishmanial pharmacophore

Romain Paoli-Lombardo <sup>1</sup>, Nicolas Primas <sup>1,2,\*</sup>, Sandra Bourgeade-Delmas <sup>3,\*</sup>, Sébastien Hutter <sup>4</sup>, Alix Sournia-Saquet <sup>5</sup>, Clotilde Boudot <sup>6</sup>, Emilie Brenot <sup>6</sup>, Caroline Castera-Ducros <sup>1</sup>, Sophie Corvaisier <sup>7</sup>, Marc Since <sup>7</sup>, Aurélie Malzert-Fréon <sup>7</sup>, Bertrand Courtieux <sup>6</sup>, Alexis Valentin <sup>3</sup>, Pierre Verhaeghe <sup>5,8</sup>, Nadine Azas <sup>4</sup>, Pascal Rathelot <sup>1,2</sup> and Patrice Vanelle <sup>1,2,\*</sup>

<sup>1</sup> Aix Marseille Univ, CNRS, ICR UMR 7273, Equipe Pharmaco-Chimie Radicalaire, Faculté de Pharmacie, 27 Boulevard Jean Moulin, CS30064, 13385, Marseille Cedex 05, France

<sup>2</sup> AP-HM, Service Central de la Qualité et de l'Information Pharmaceutiques, Hôpital de la Conception, 13005, Marseille, France

<sup>3</sup> UMR 152 PHARMA-DEV, Université de Toulouse, IRD, UPS, Toulouse, France

<sup>4</sup> Aix Marseille Univ, IHU Méditerranée Infection, UMR VITROME - Tropical Eukaryotic Pathogens, 19-21 Boulevard Jean Moulin, 13005, Marseille, France

<sup>5</sup> LCC-CNRS Université de Toulouse, CNRS, UPS, 31077, Toulouse, France

<sup>6</sup> Université de Limoges, UMR Inserm 1094, Neuroépidémiologie Tropicale, Faculté de Pharmacie, 2 Rue Du Dr Marcland, 87025, Limoges, France

<sup>7</sup> Normandie Univ, UNICAEN, CERMN, 14000, Caen, France

<sup>8</sup> CHU de Nîmes, Service de Pharmacie, 30029, Nîmes, France

\* Correspondence: nicolas.primas@univ-amu.fr (N.P.), patrice.vanelle@univ-amu.fr (P.V.), sandra.bourgeade-delmas@ird.fr (S.B.-D)

## Supplementary materials

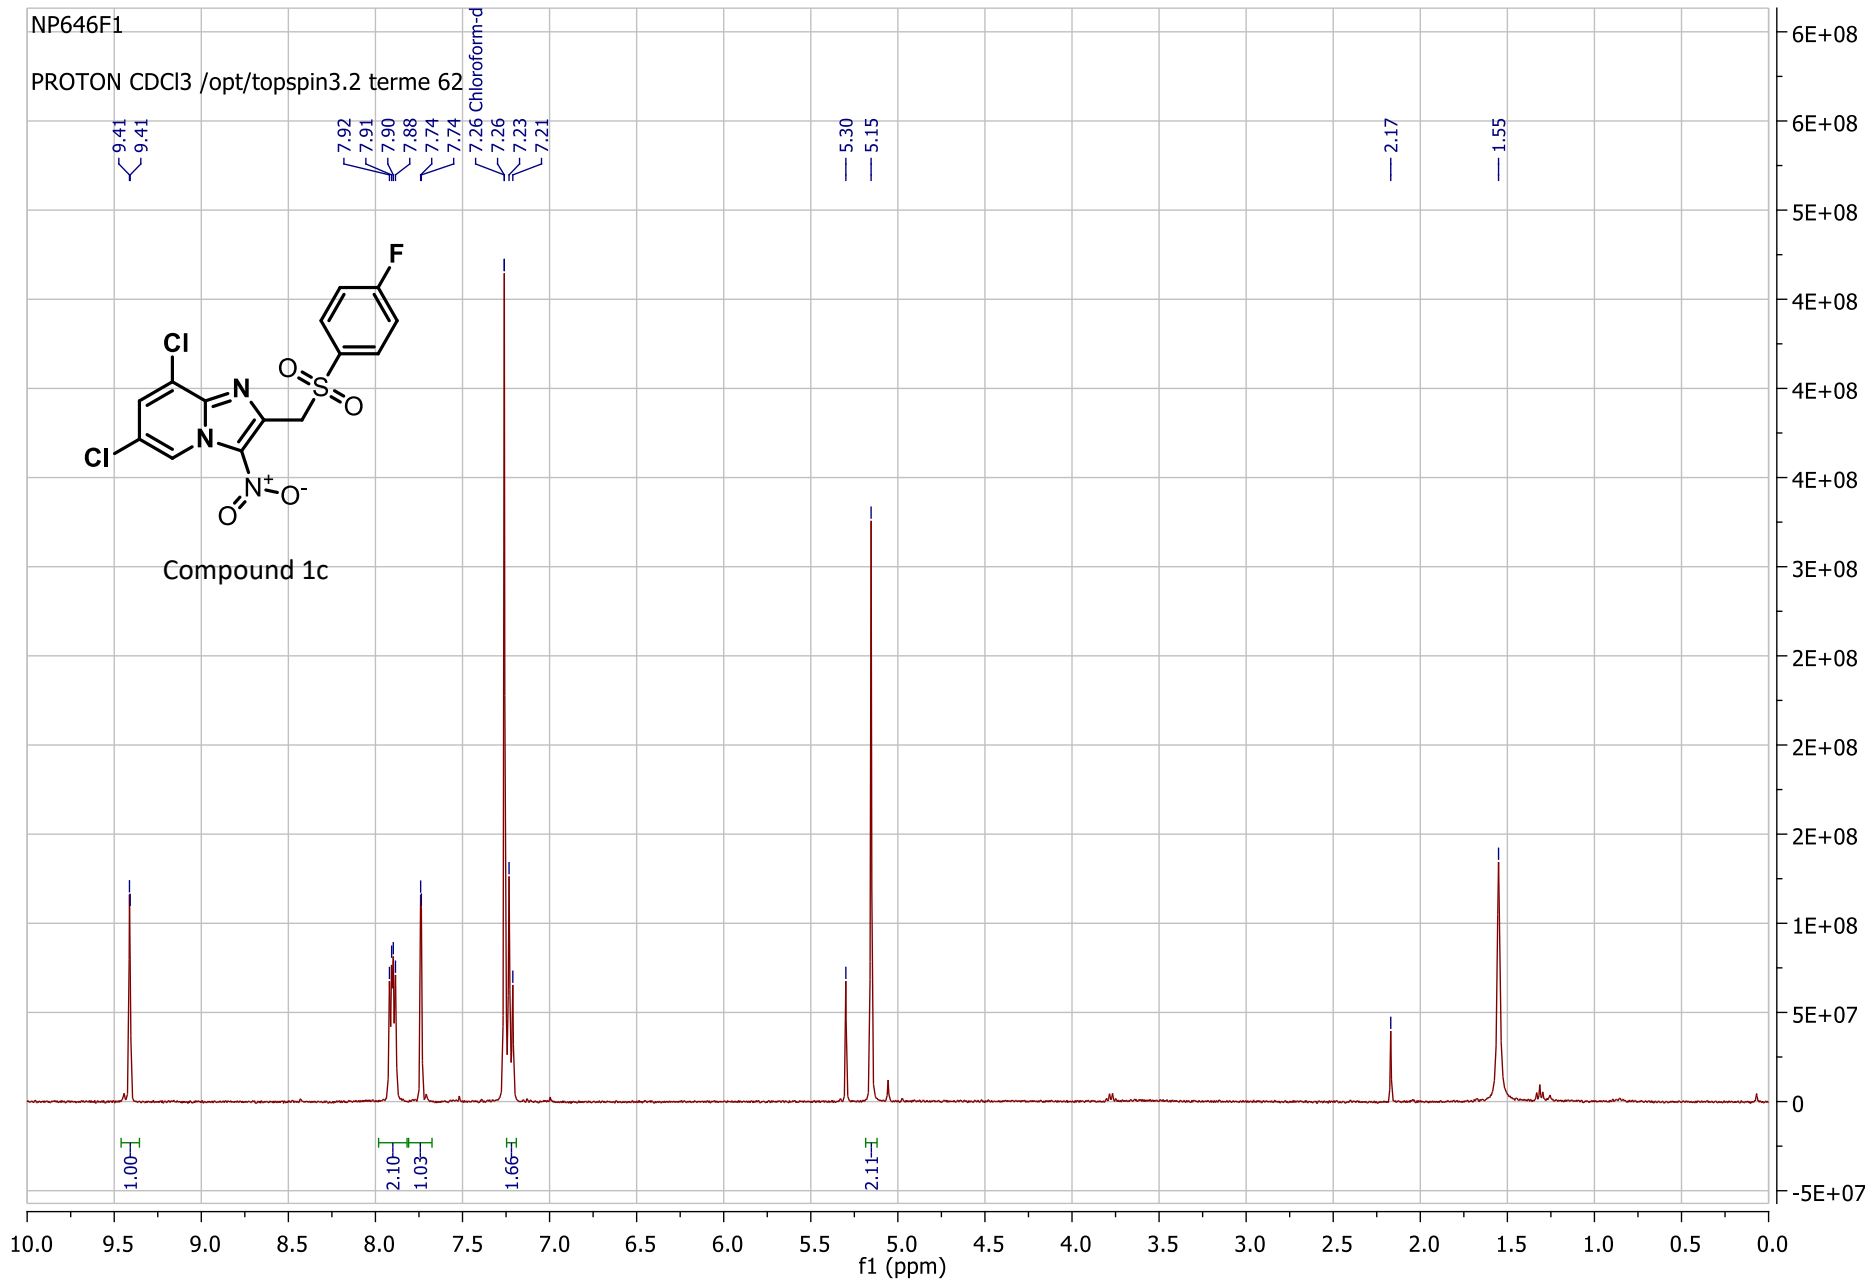

NP646

C13CPD-nuit CDCl3 /opt/topspin3.2 terme 14

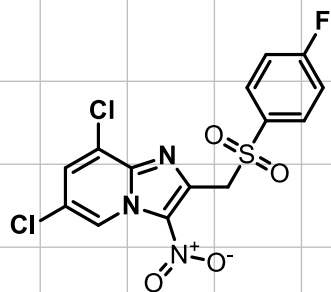

Compound 1c

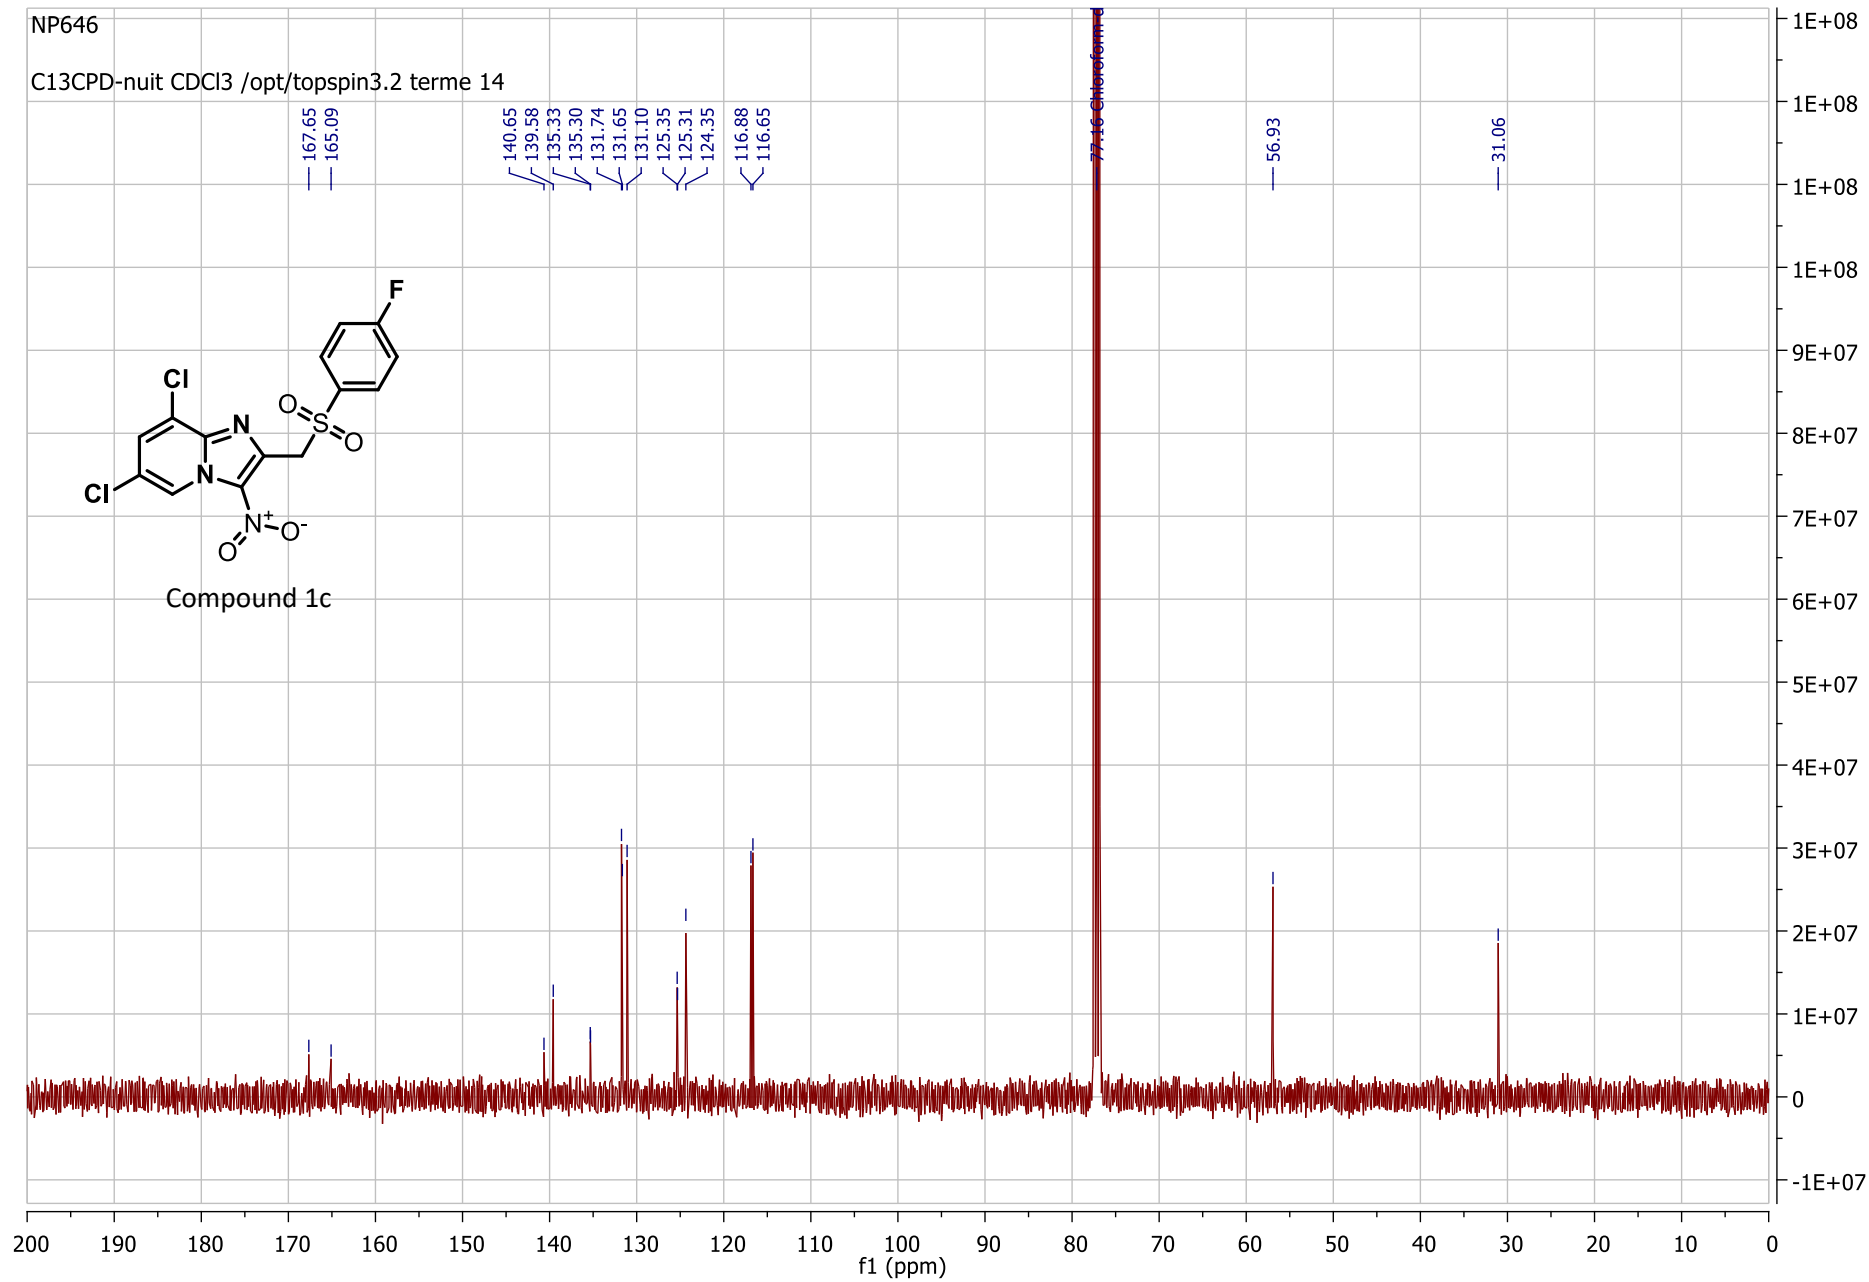

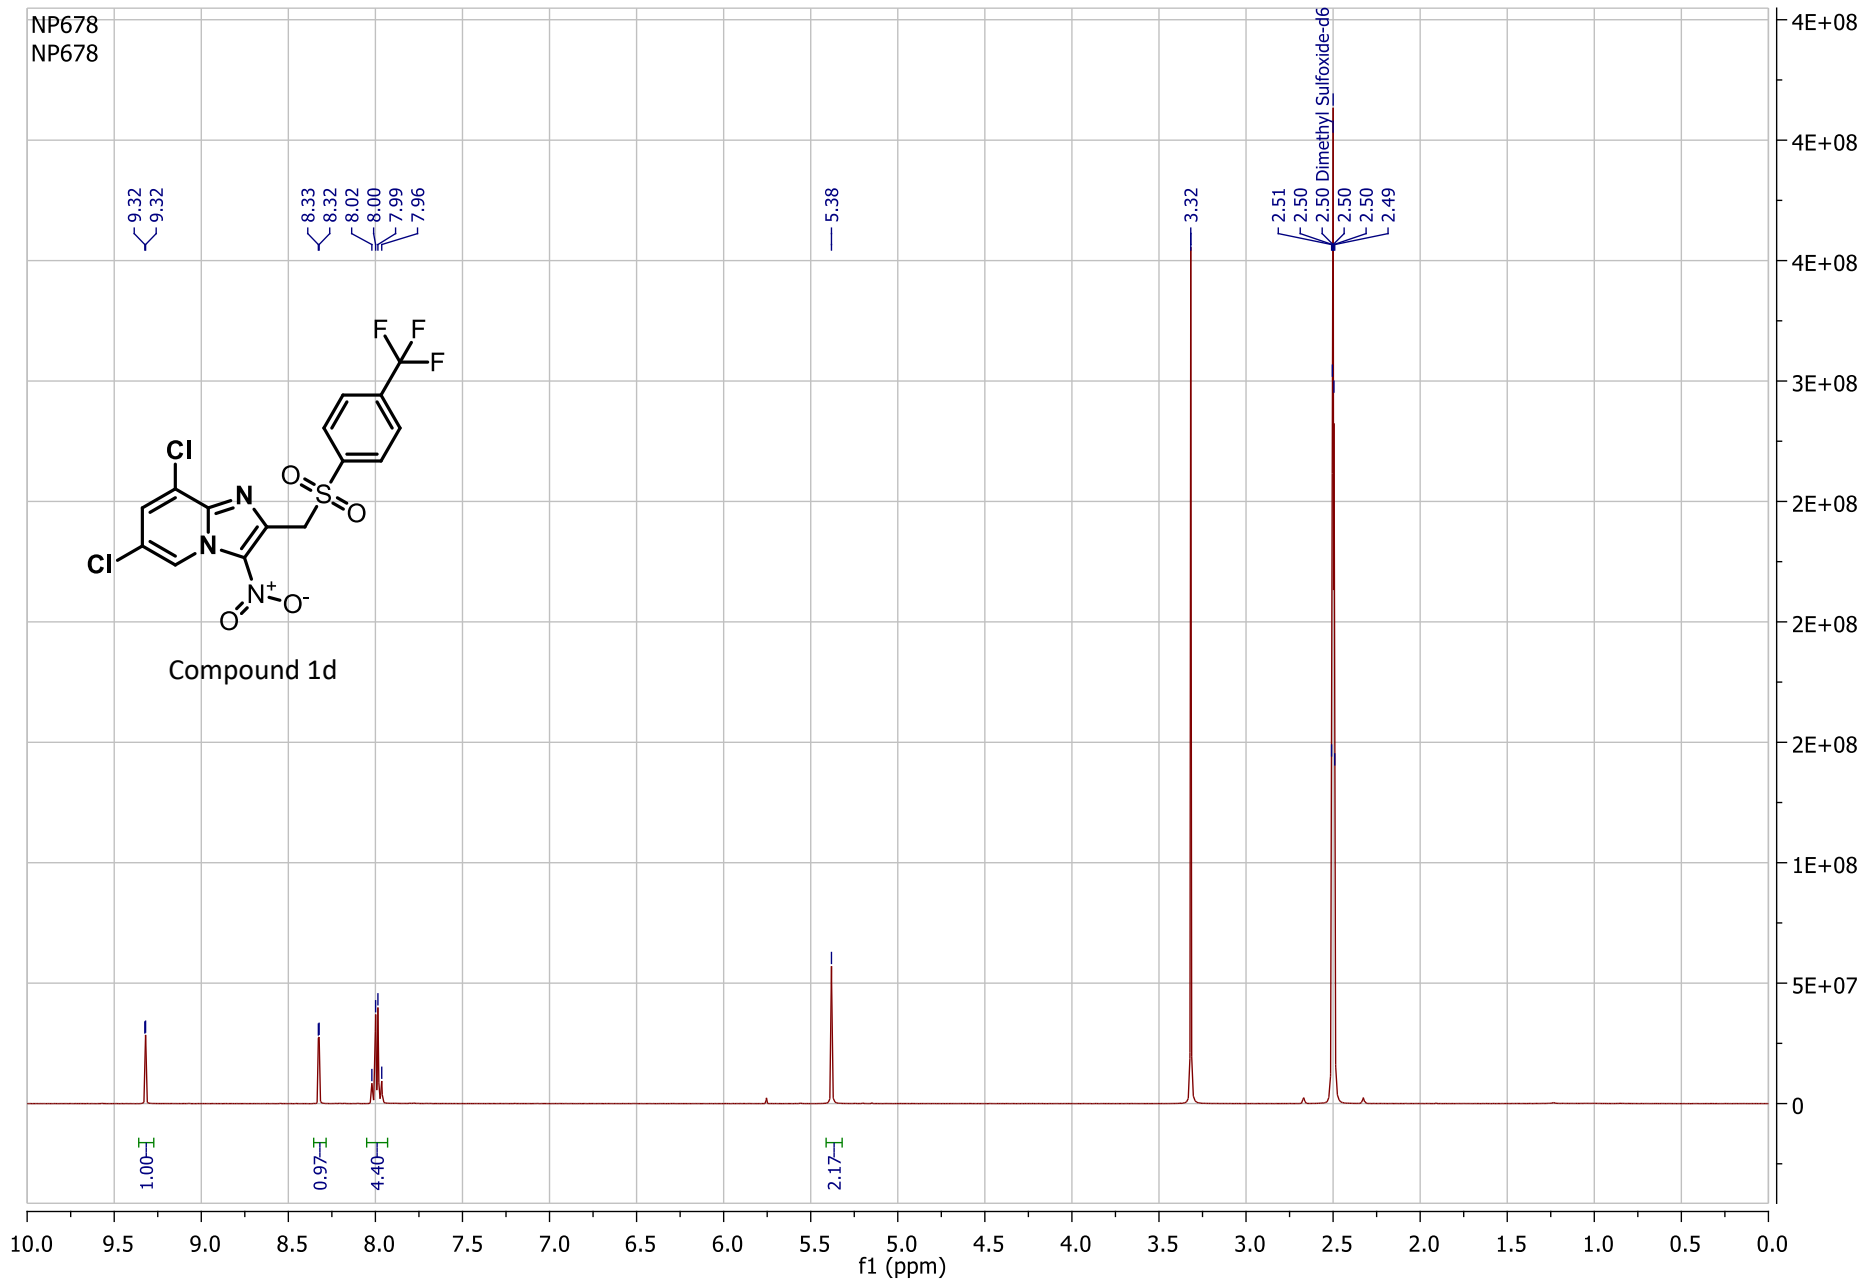

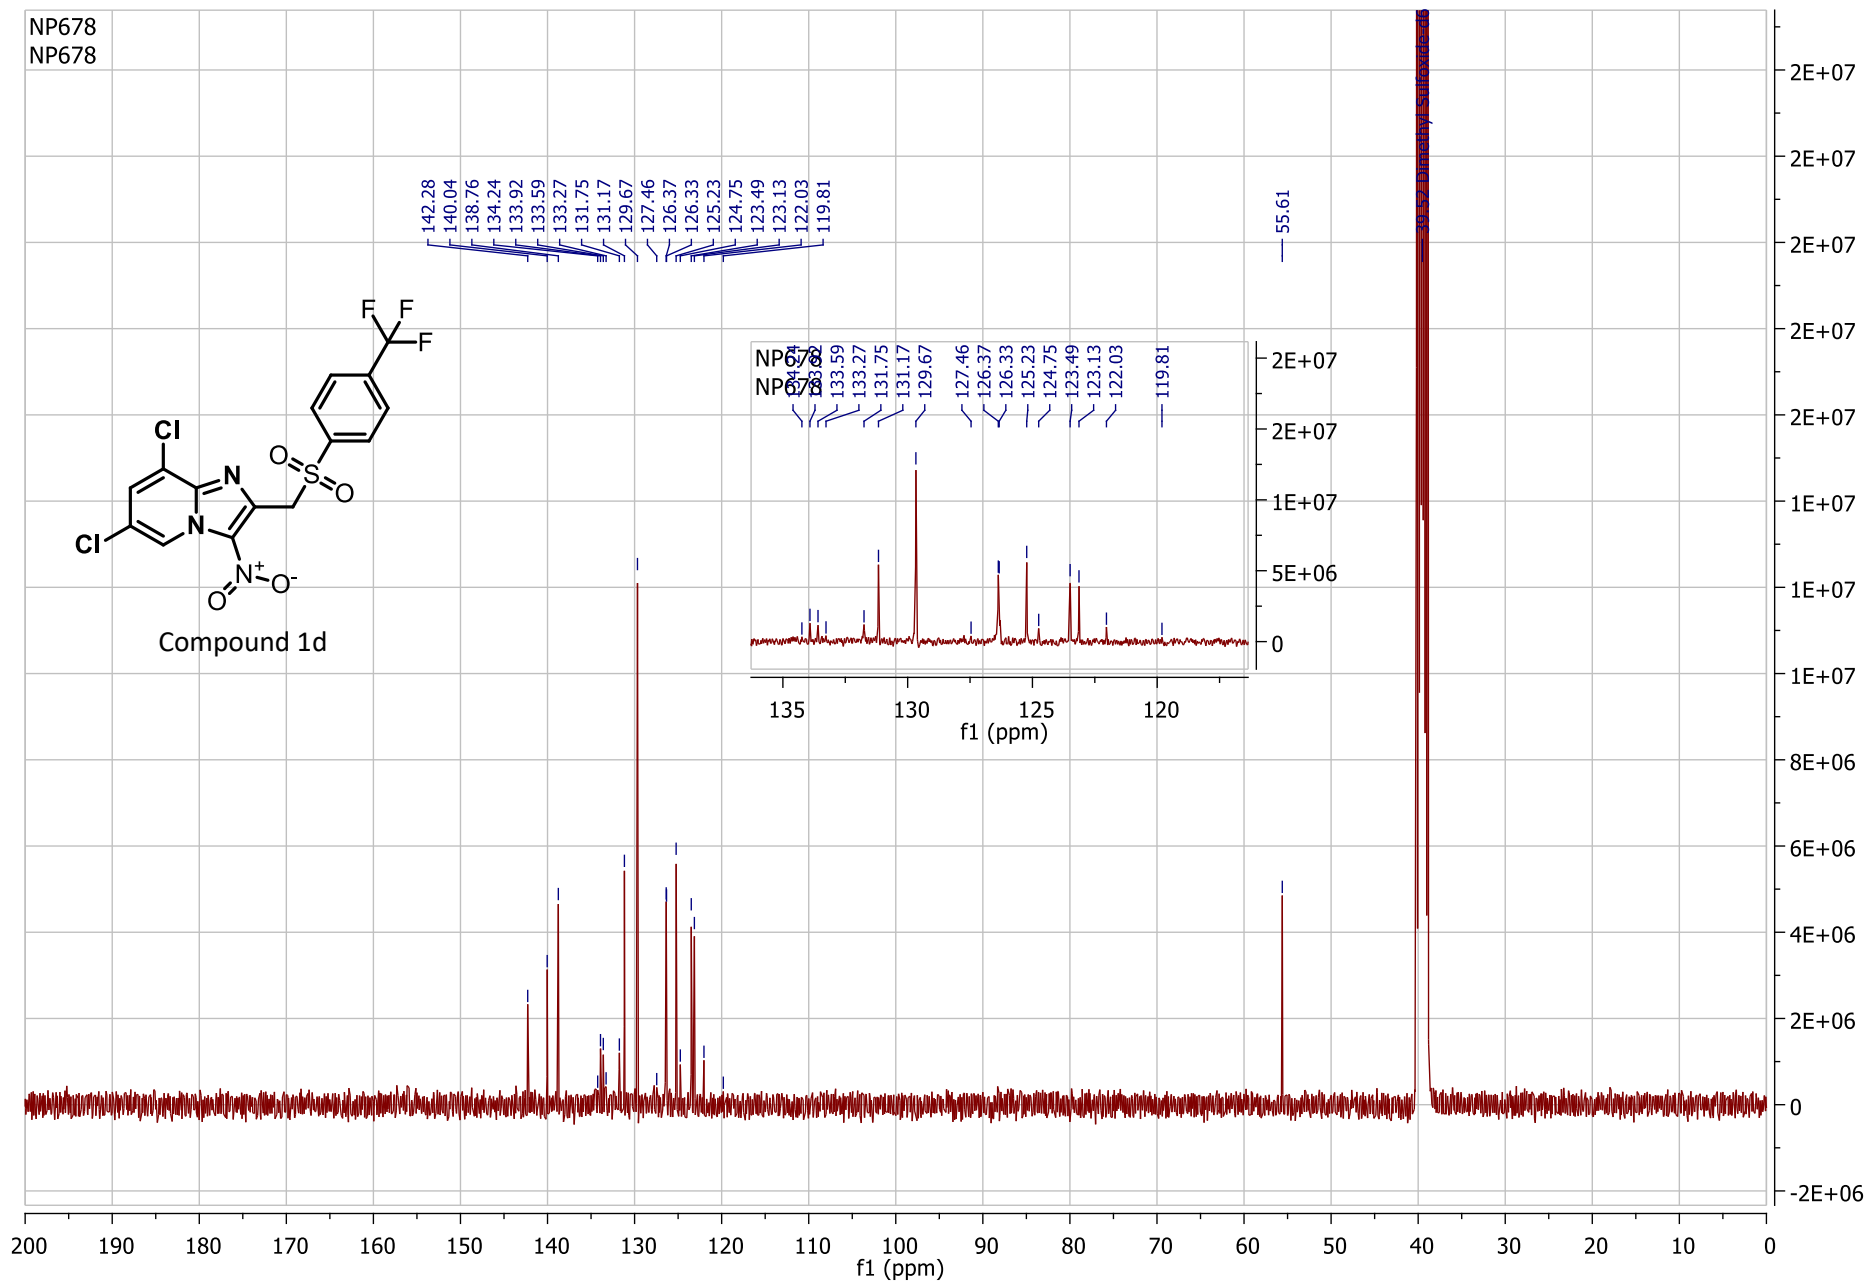

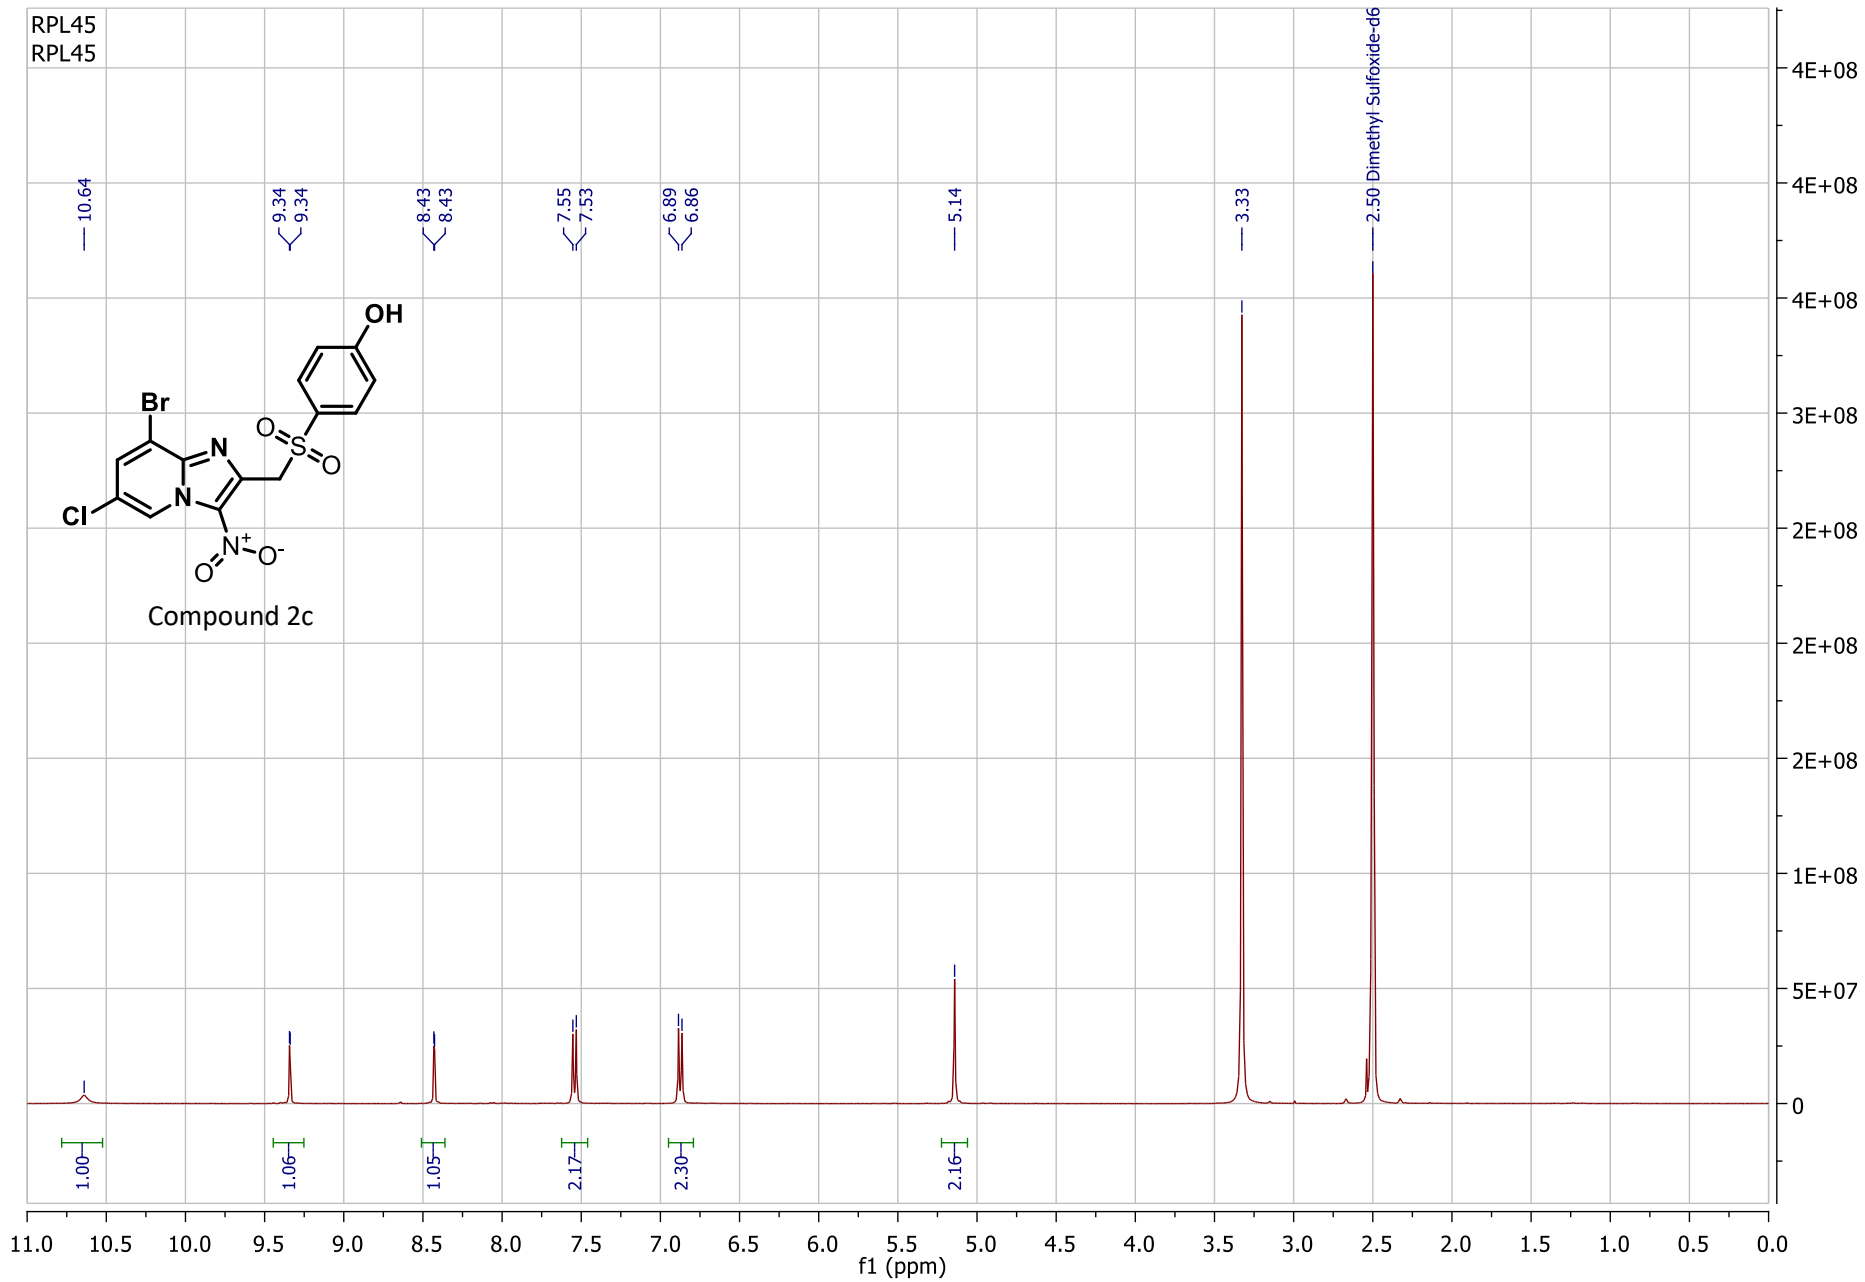

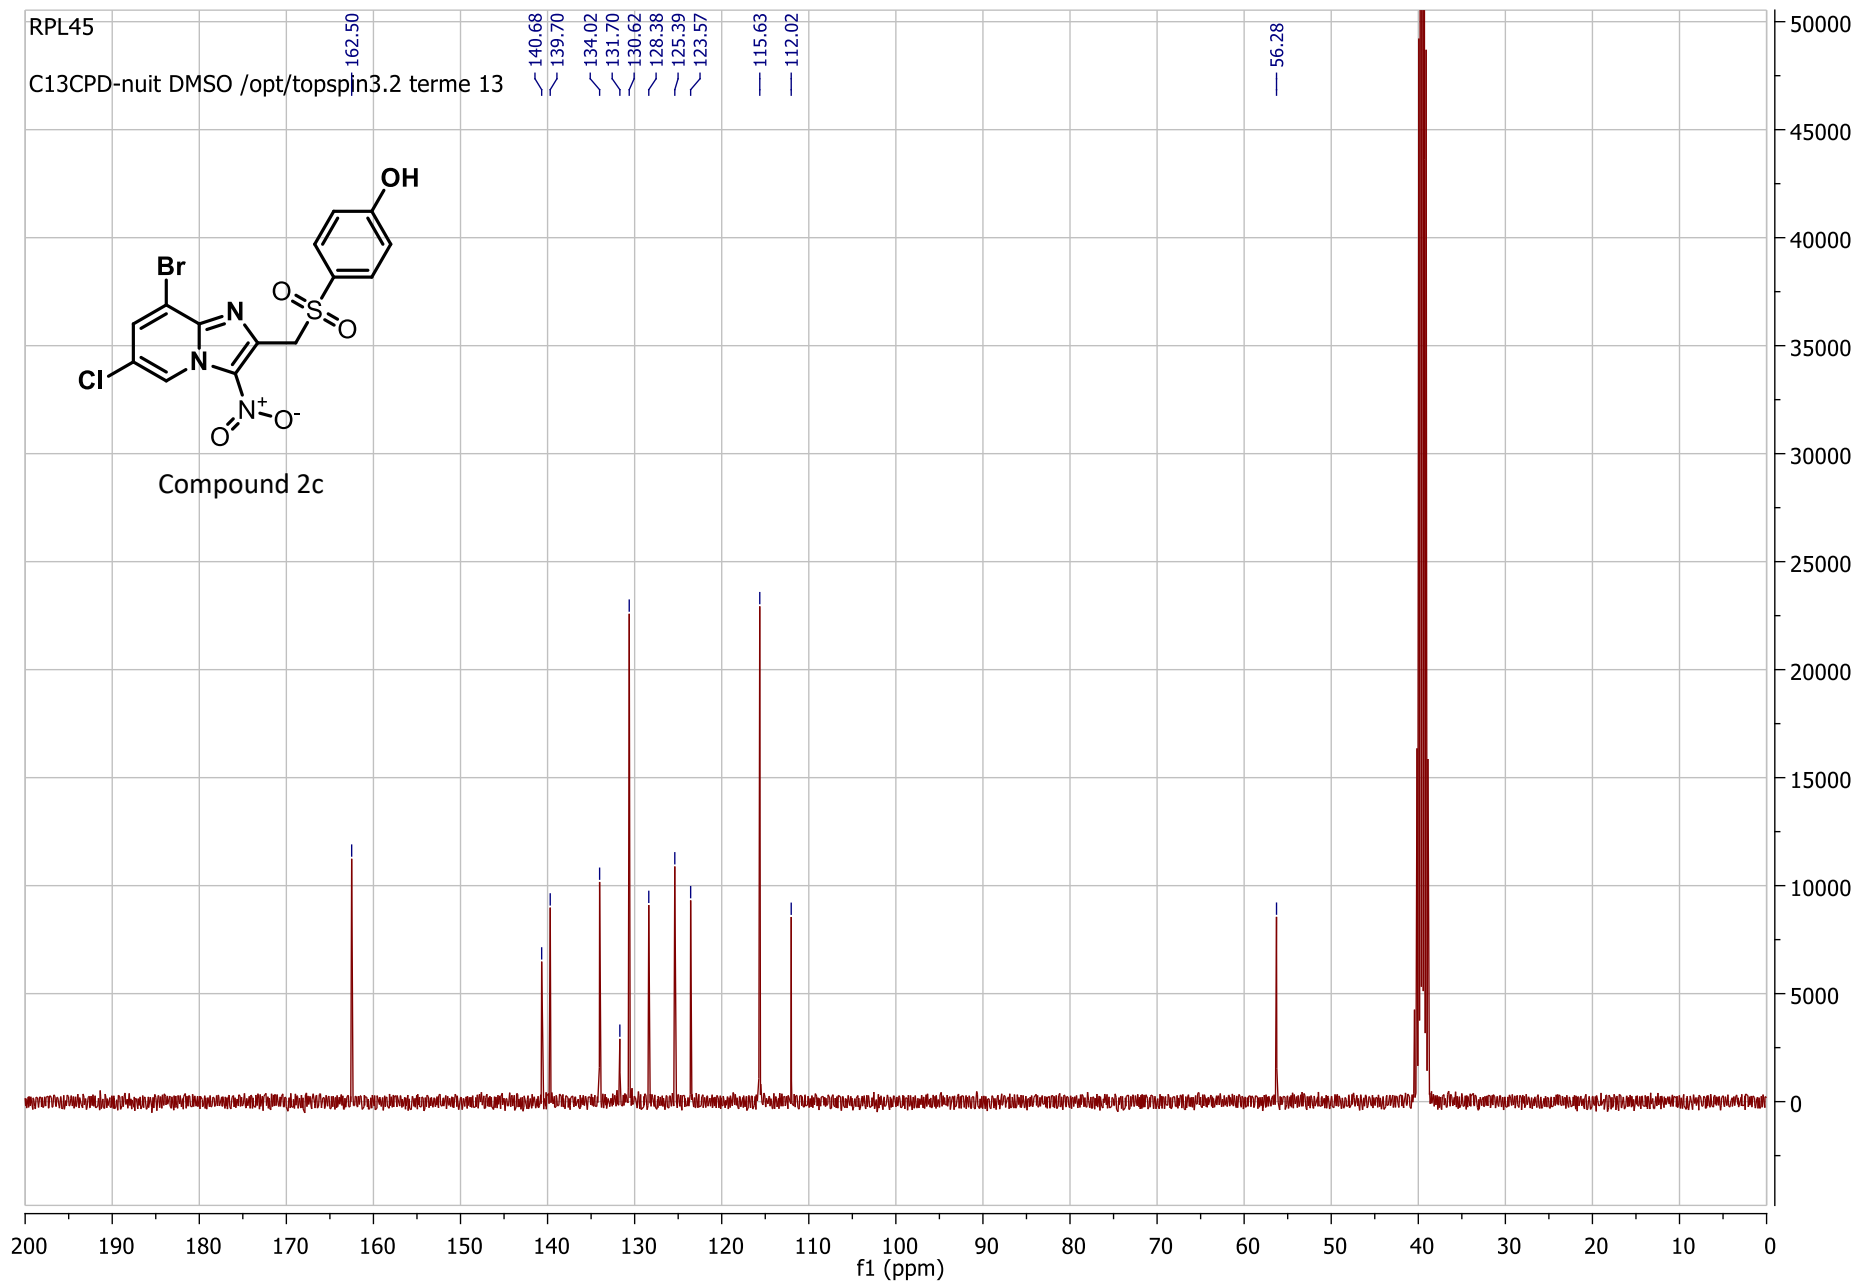

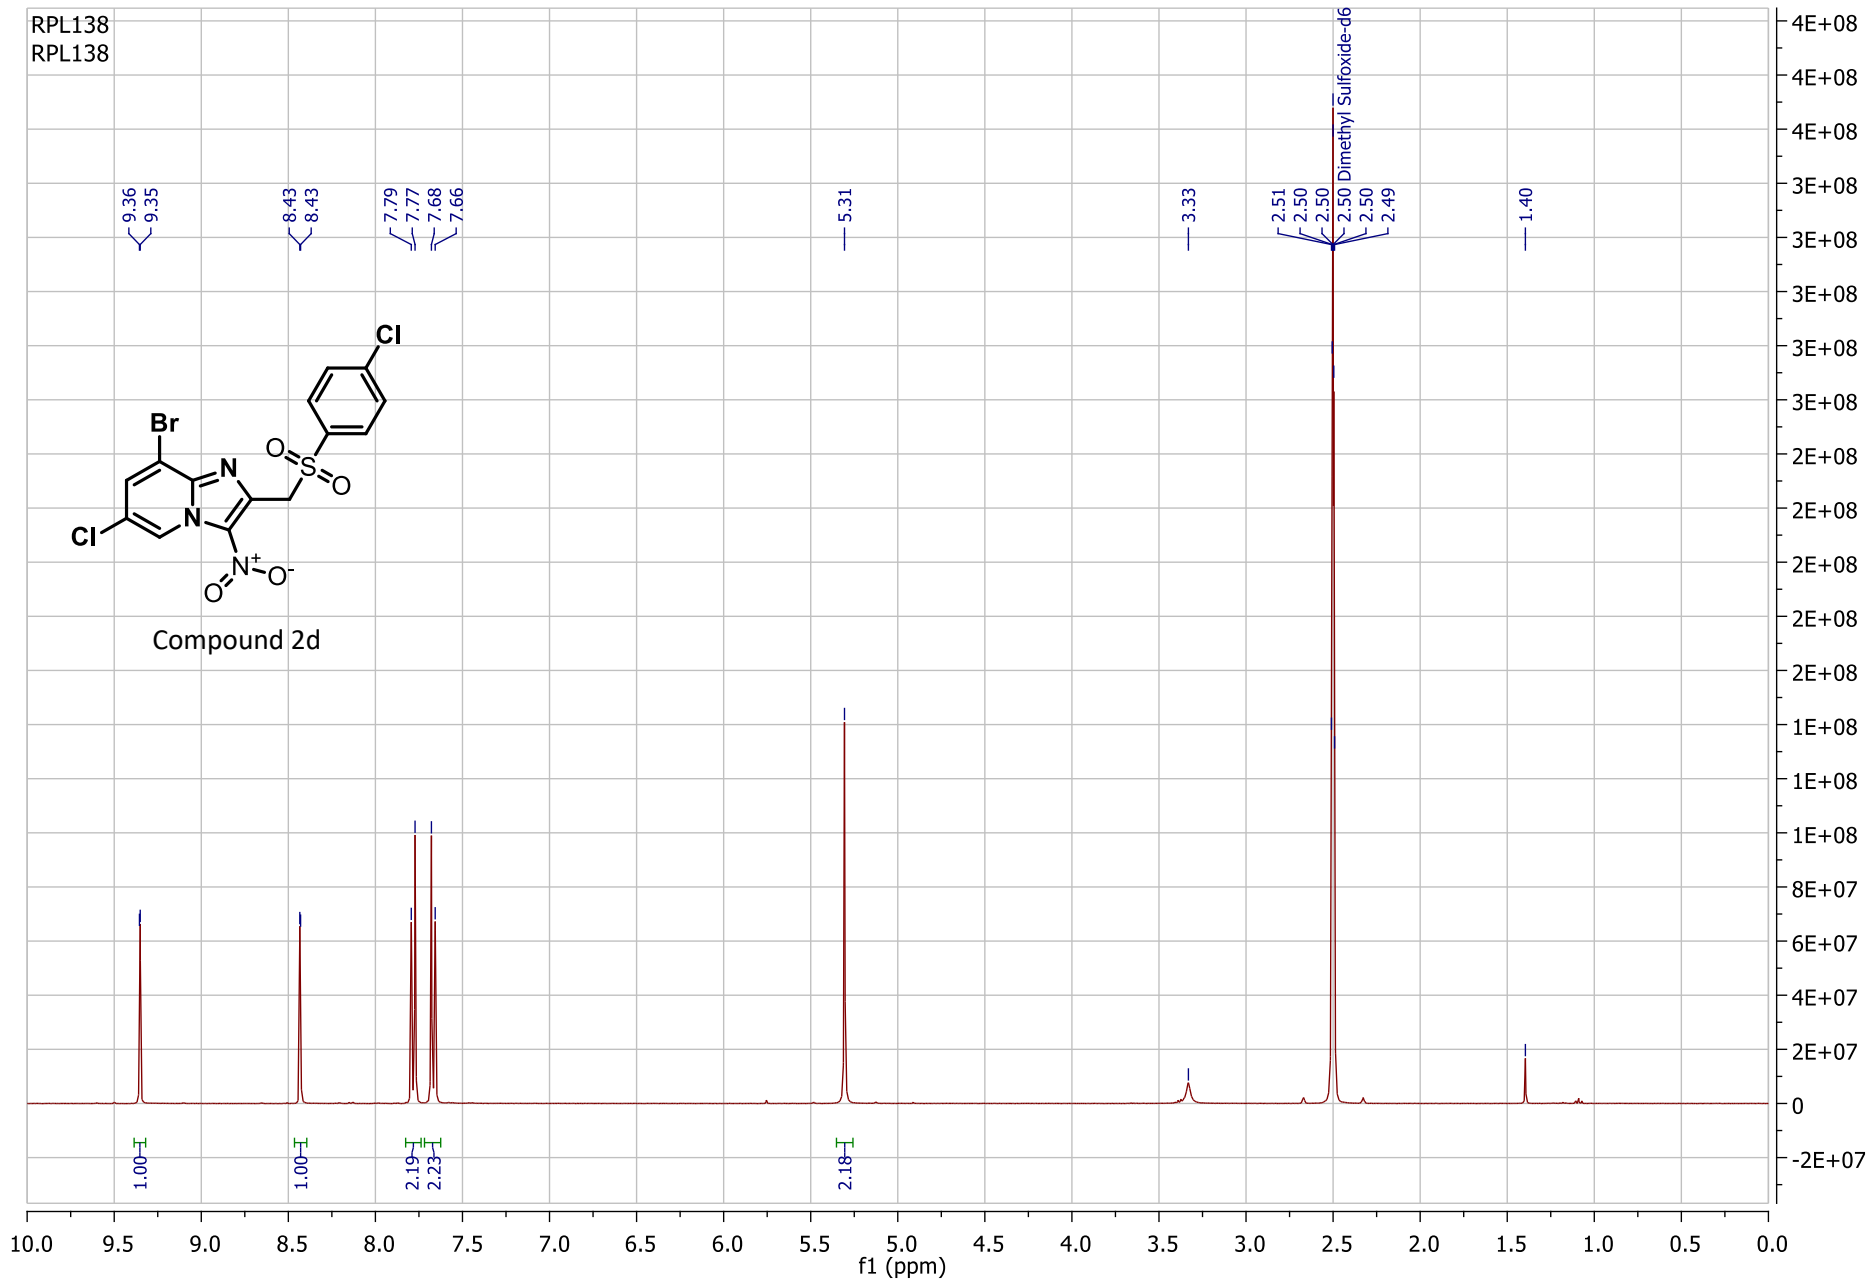



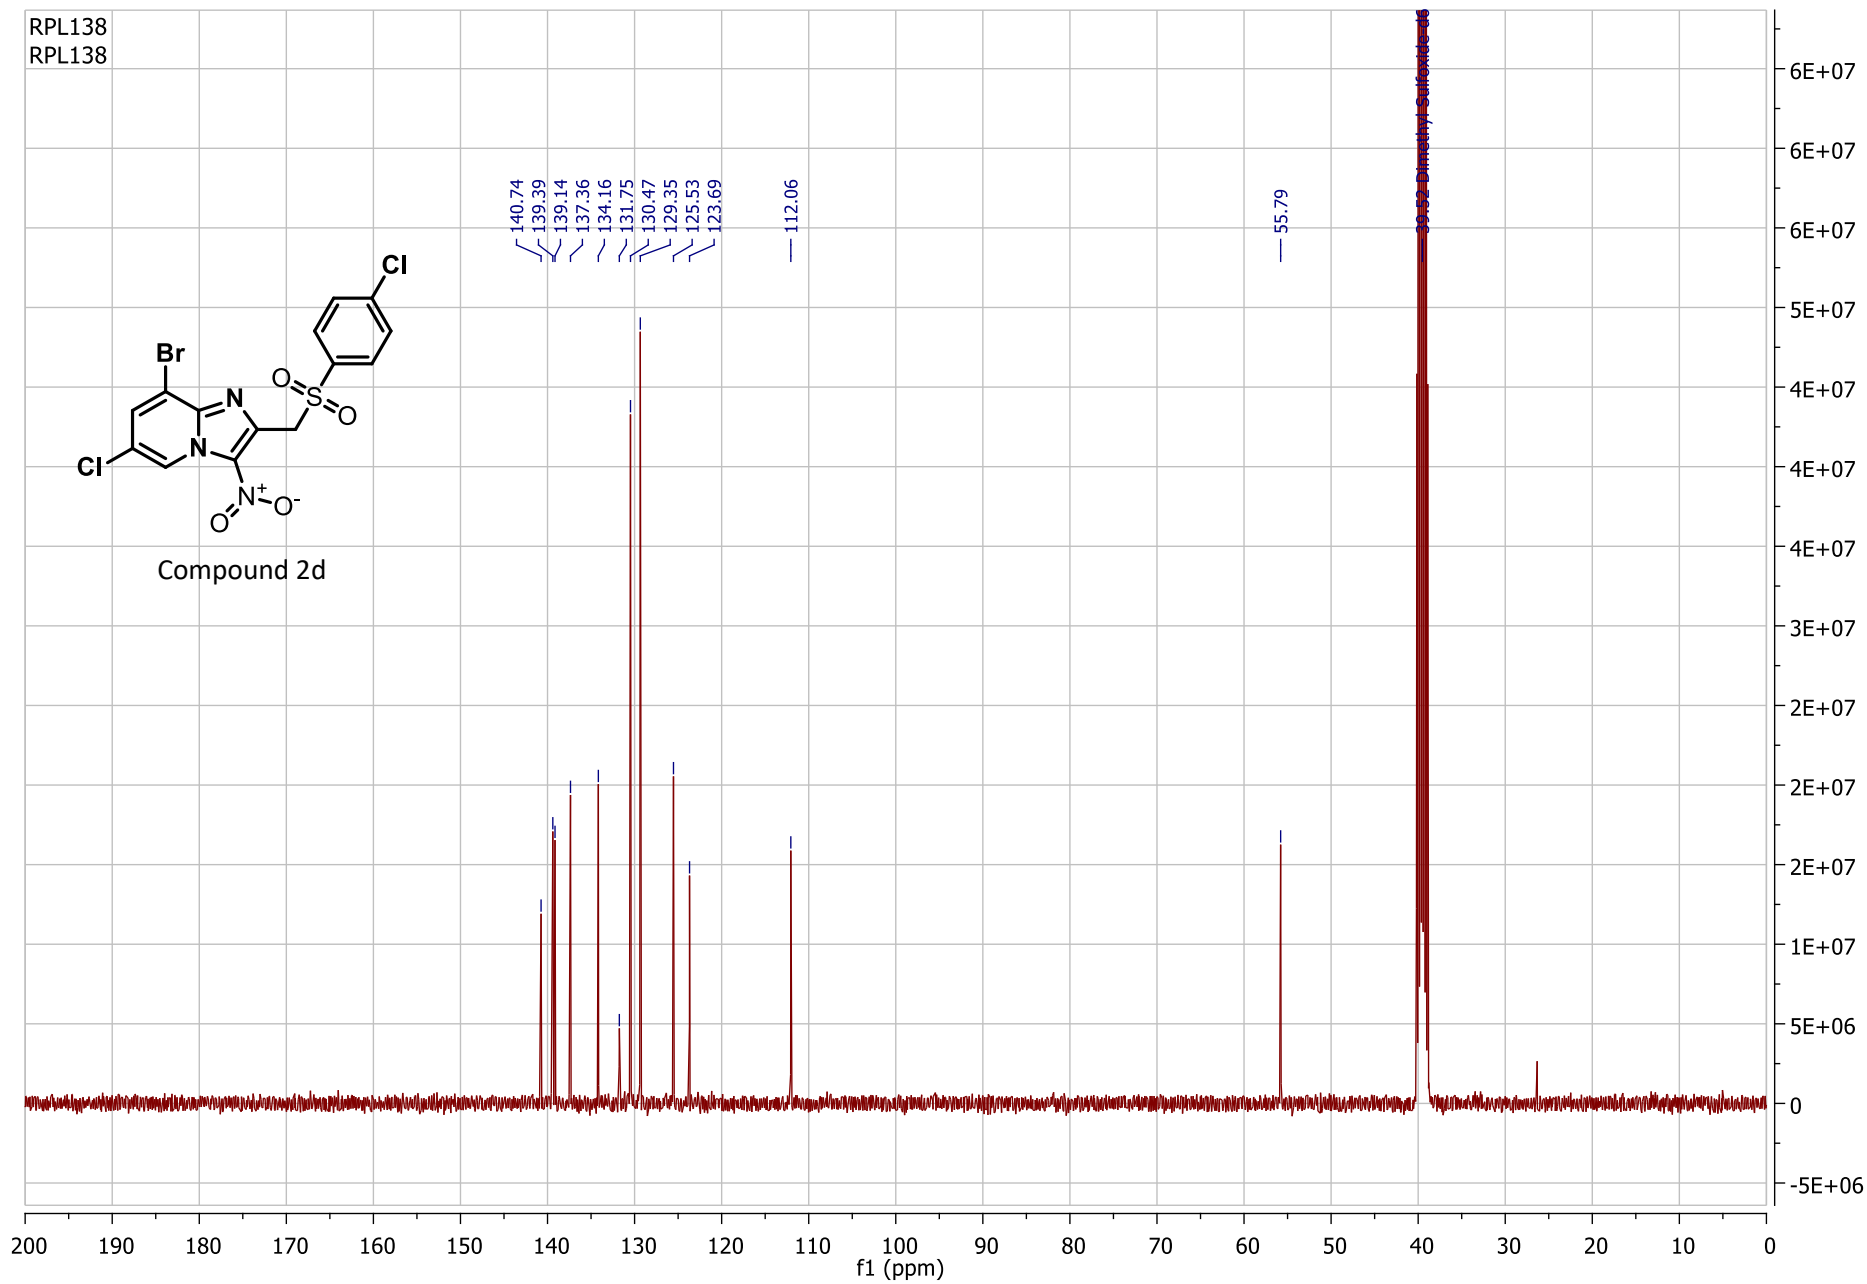

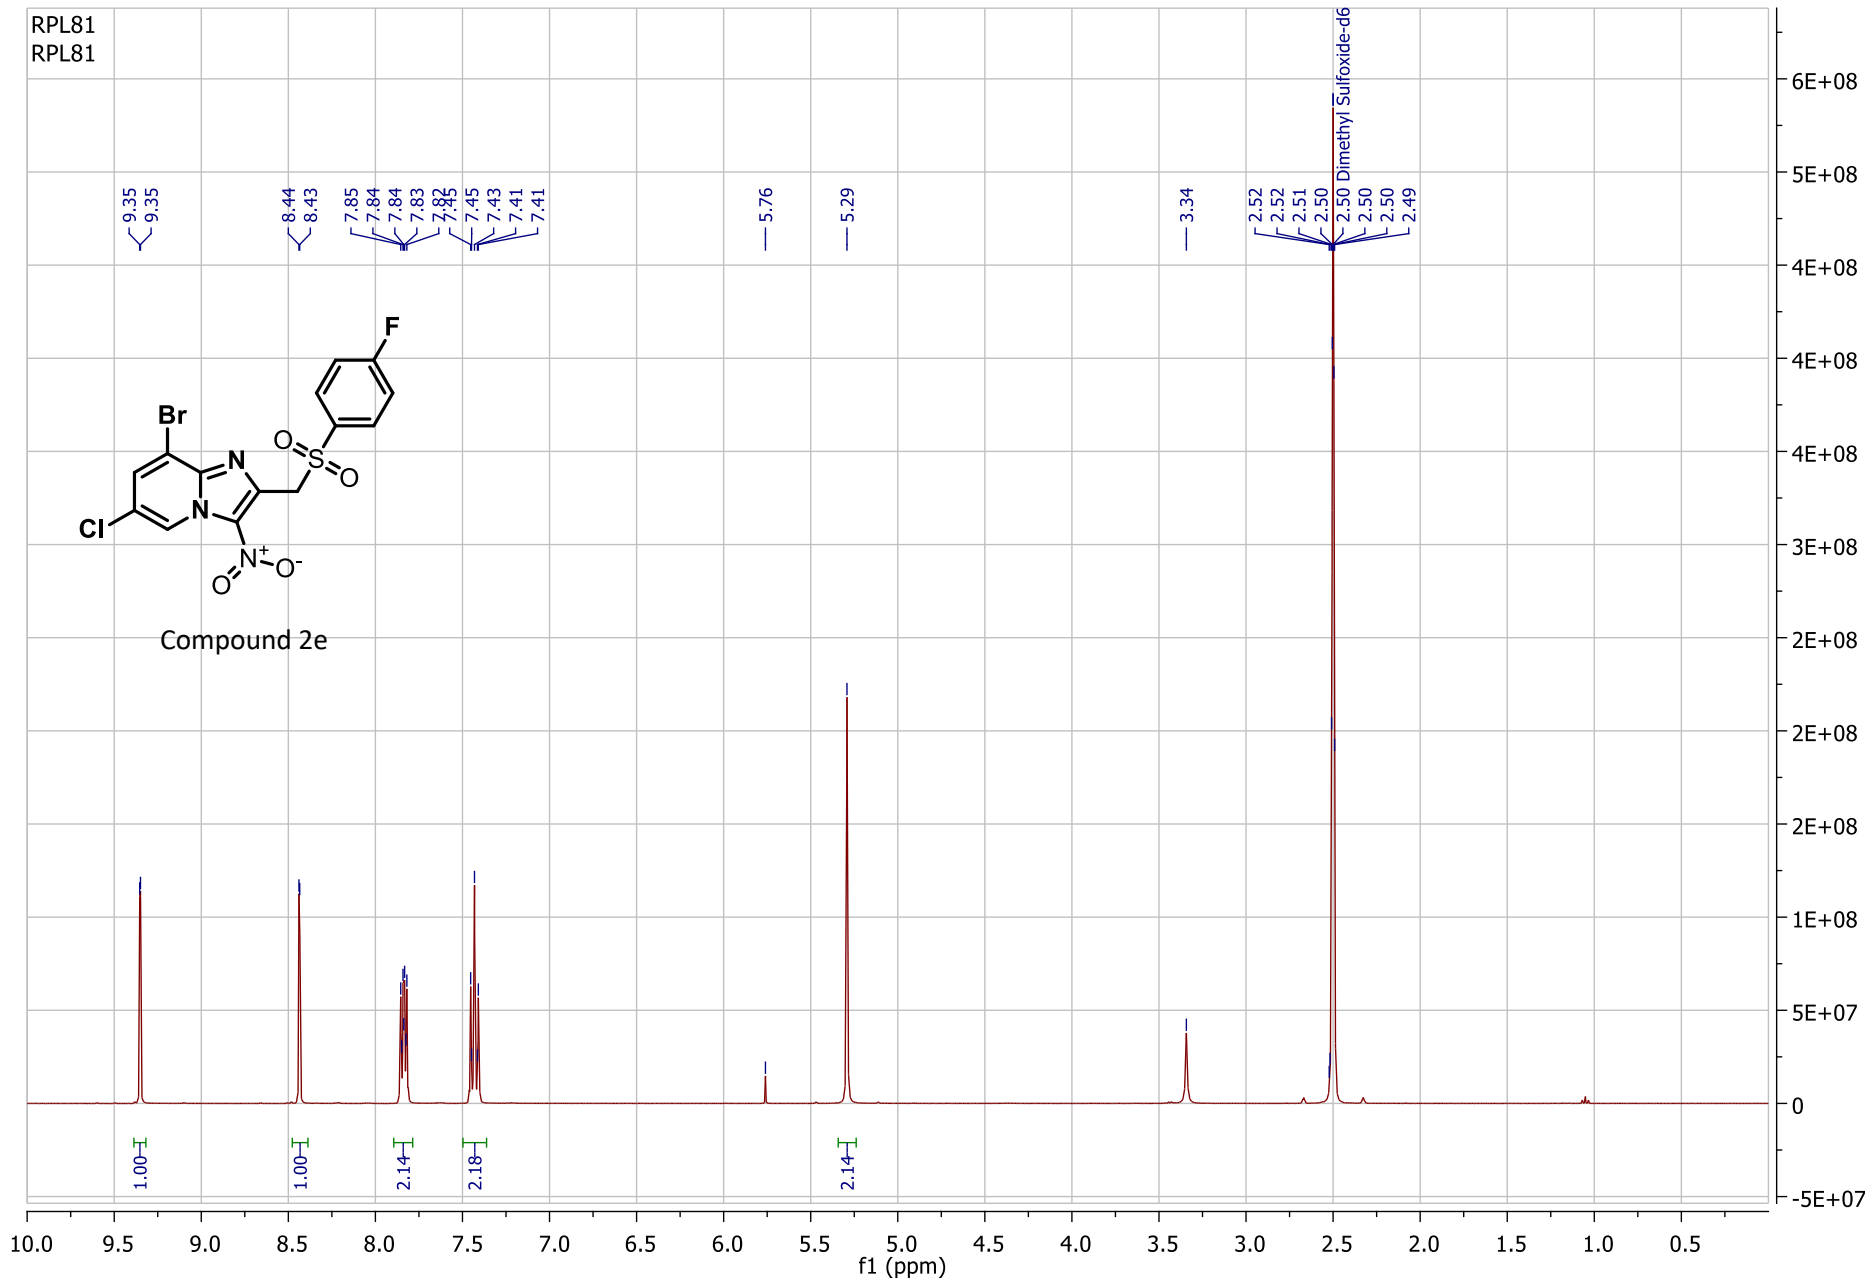

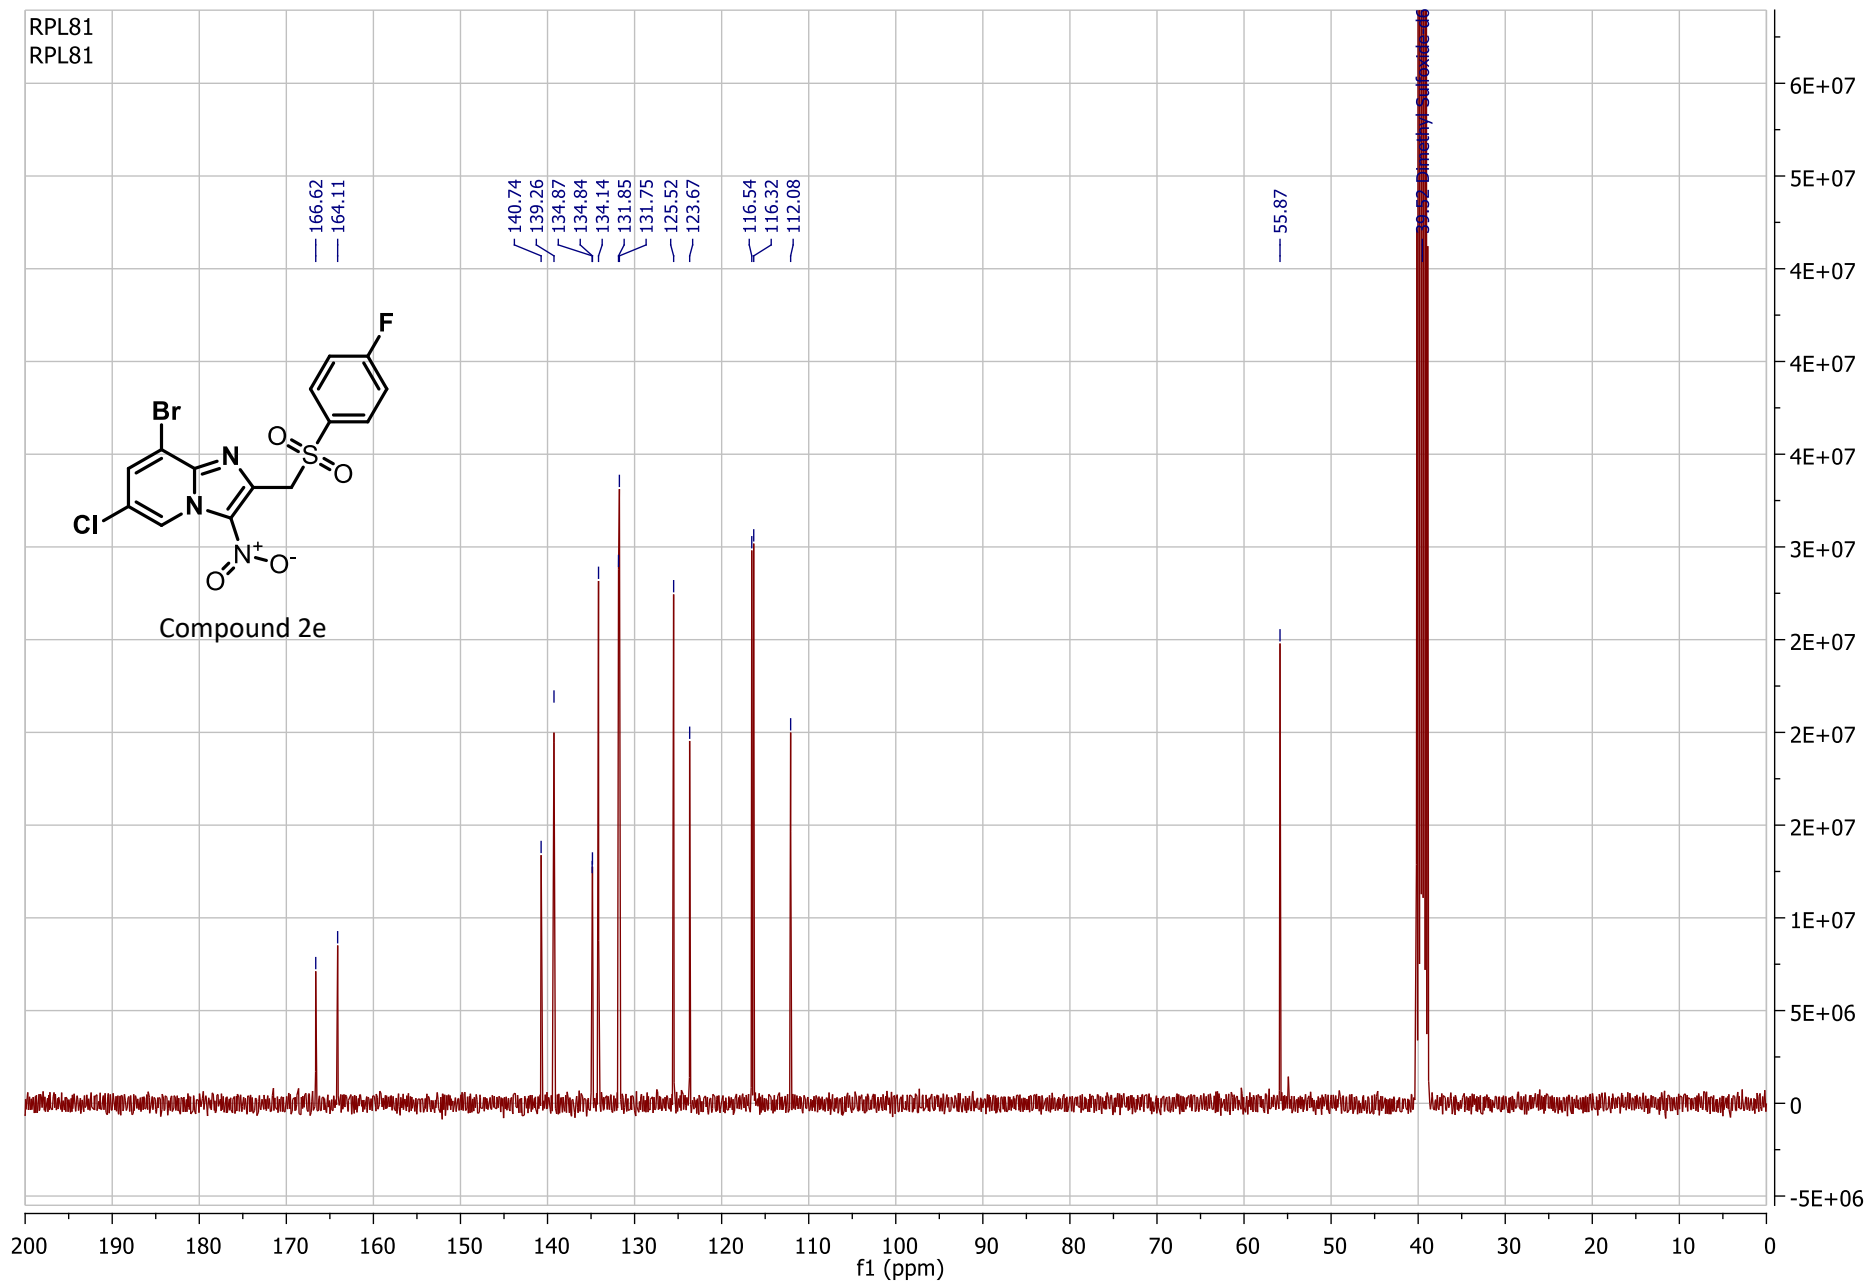

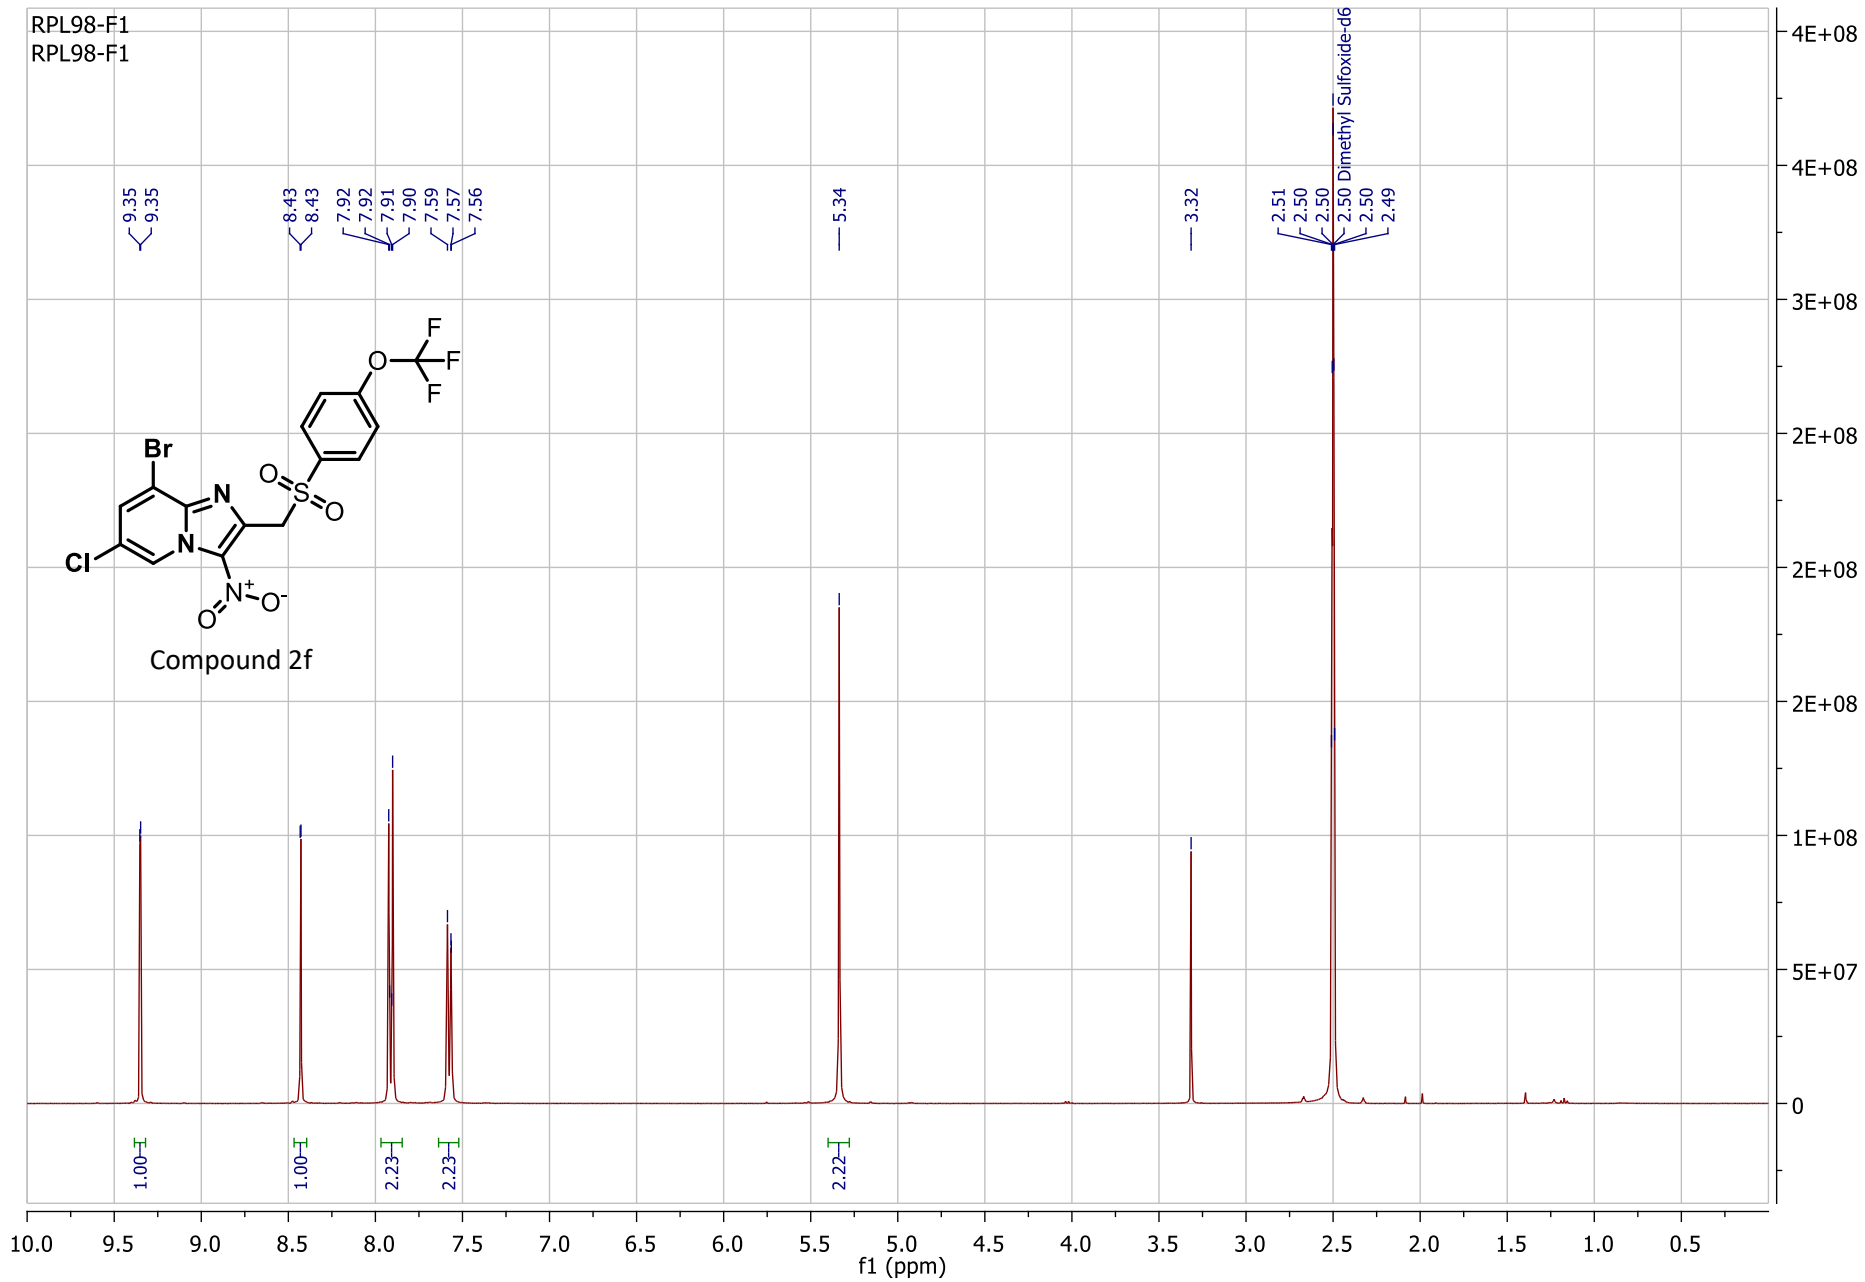

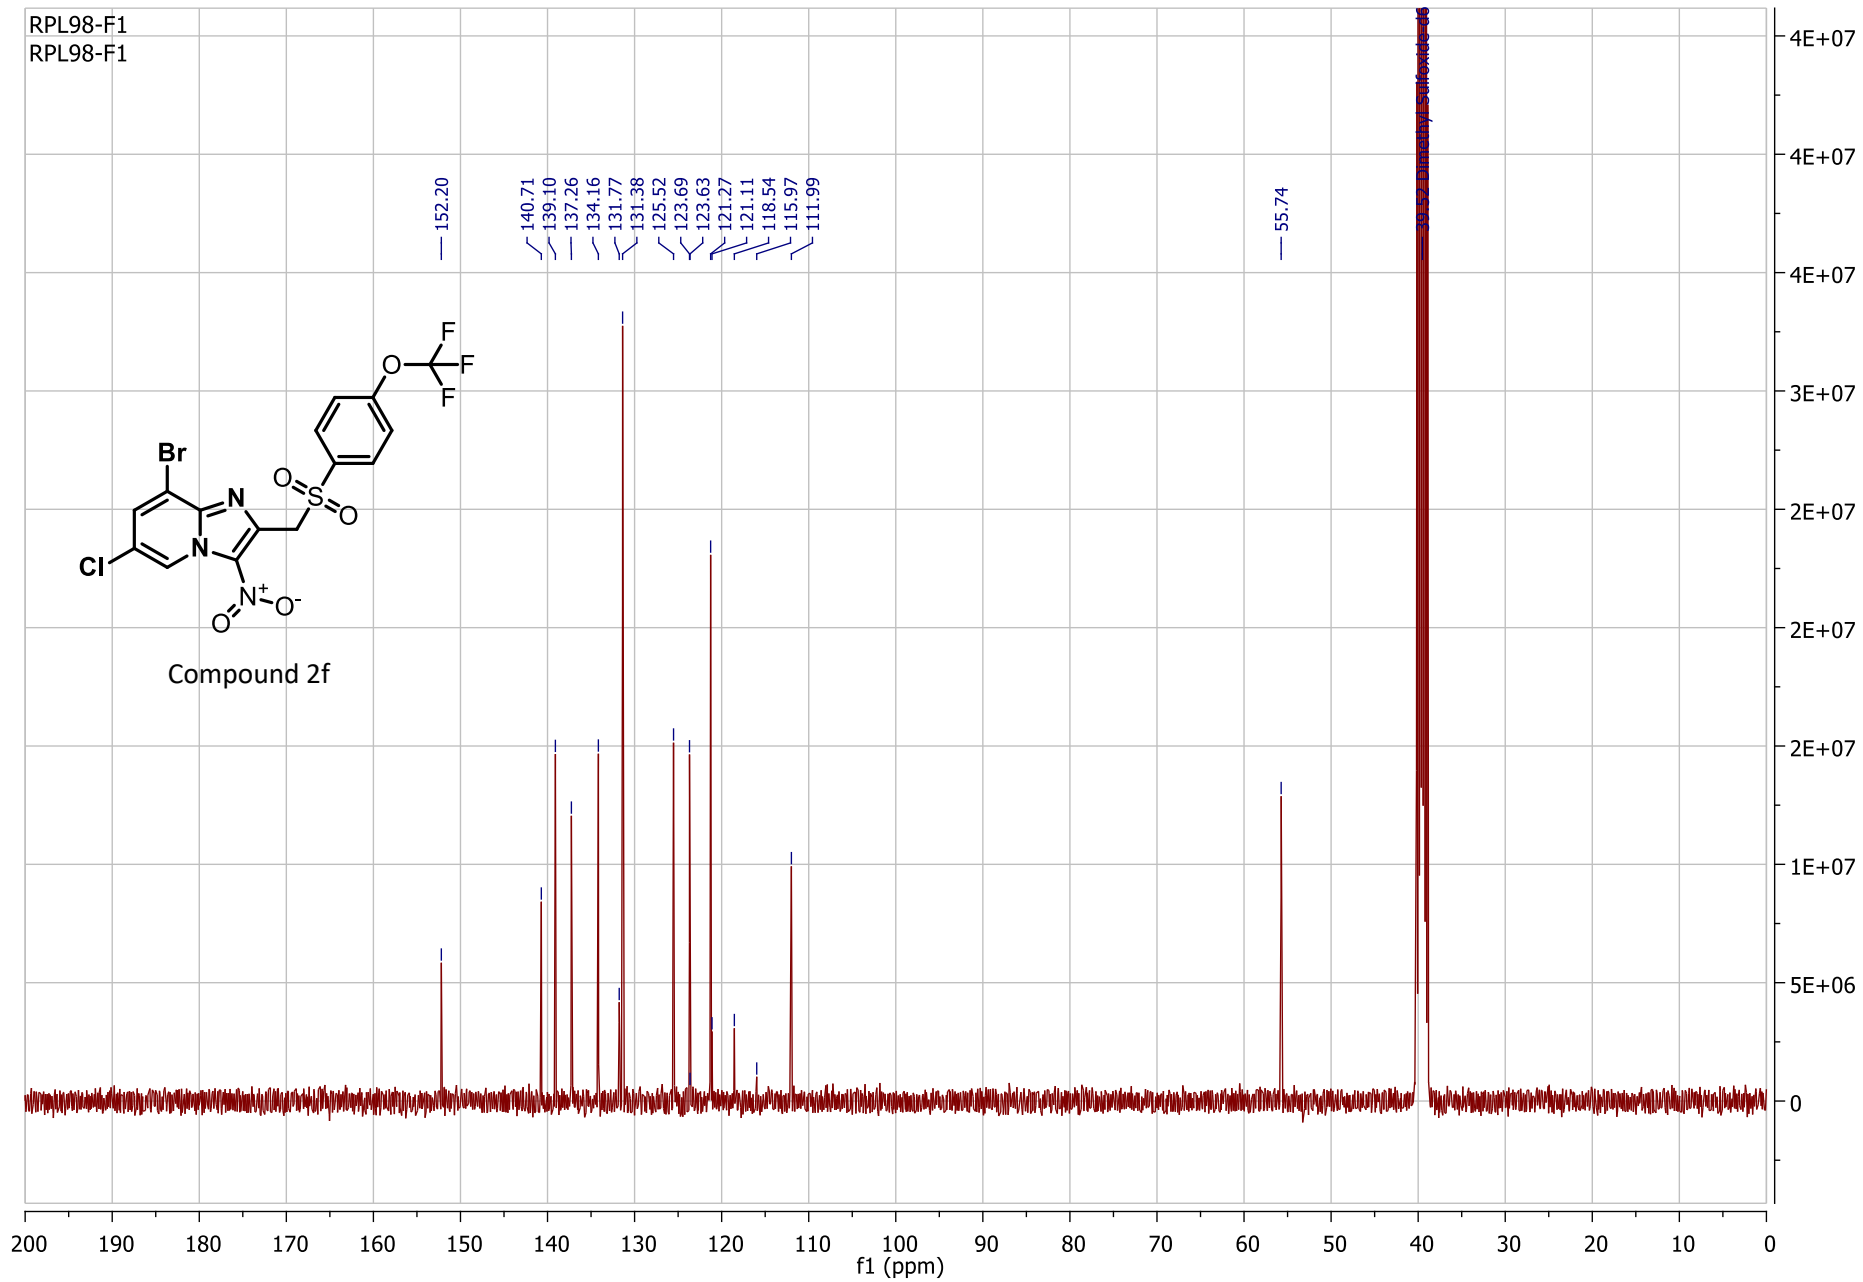

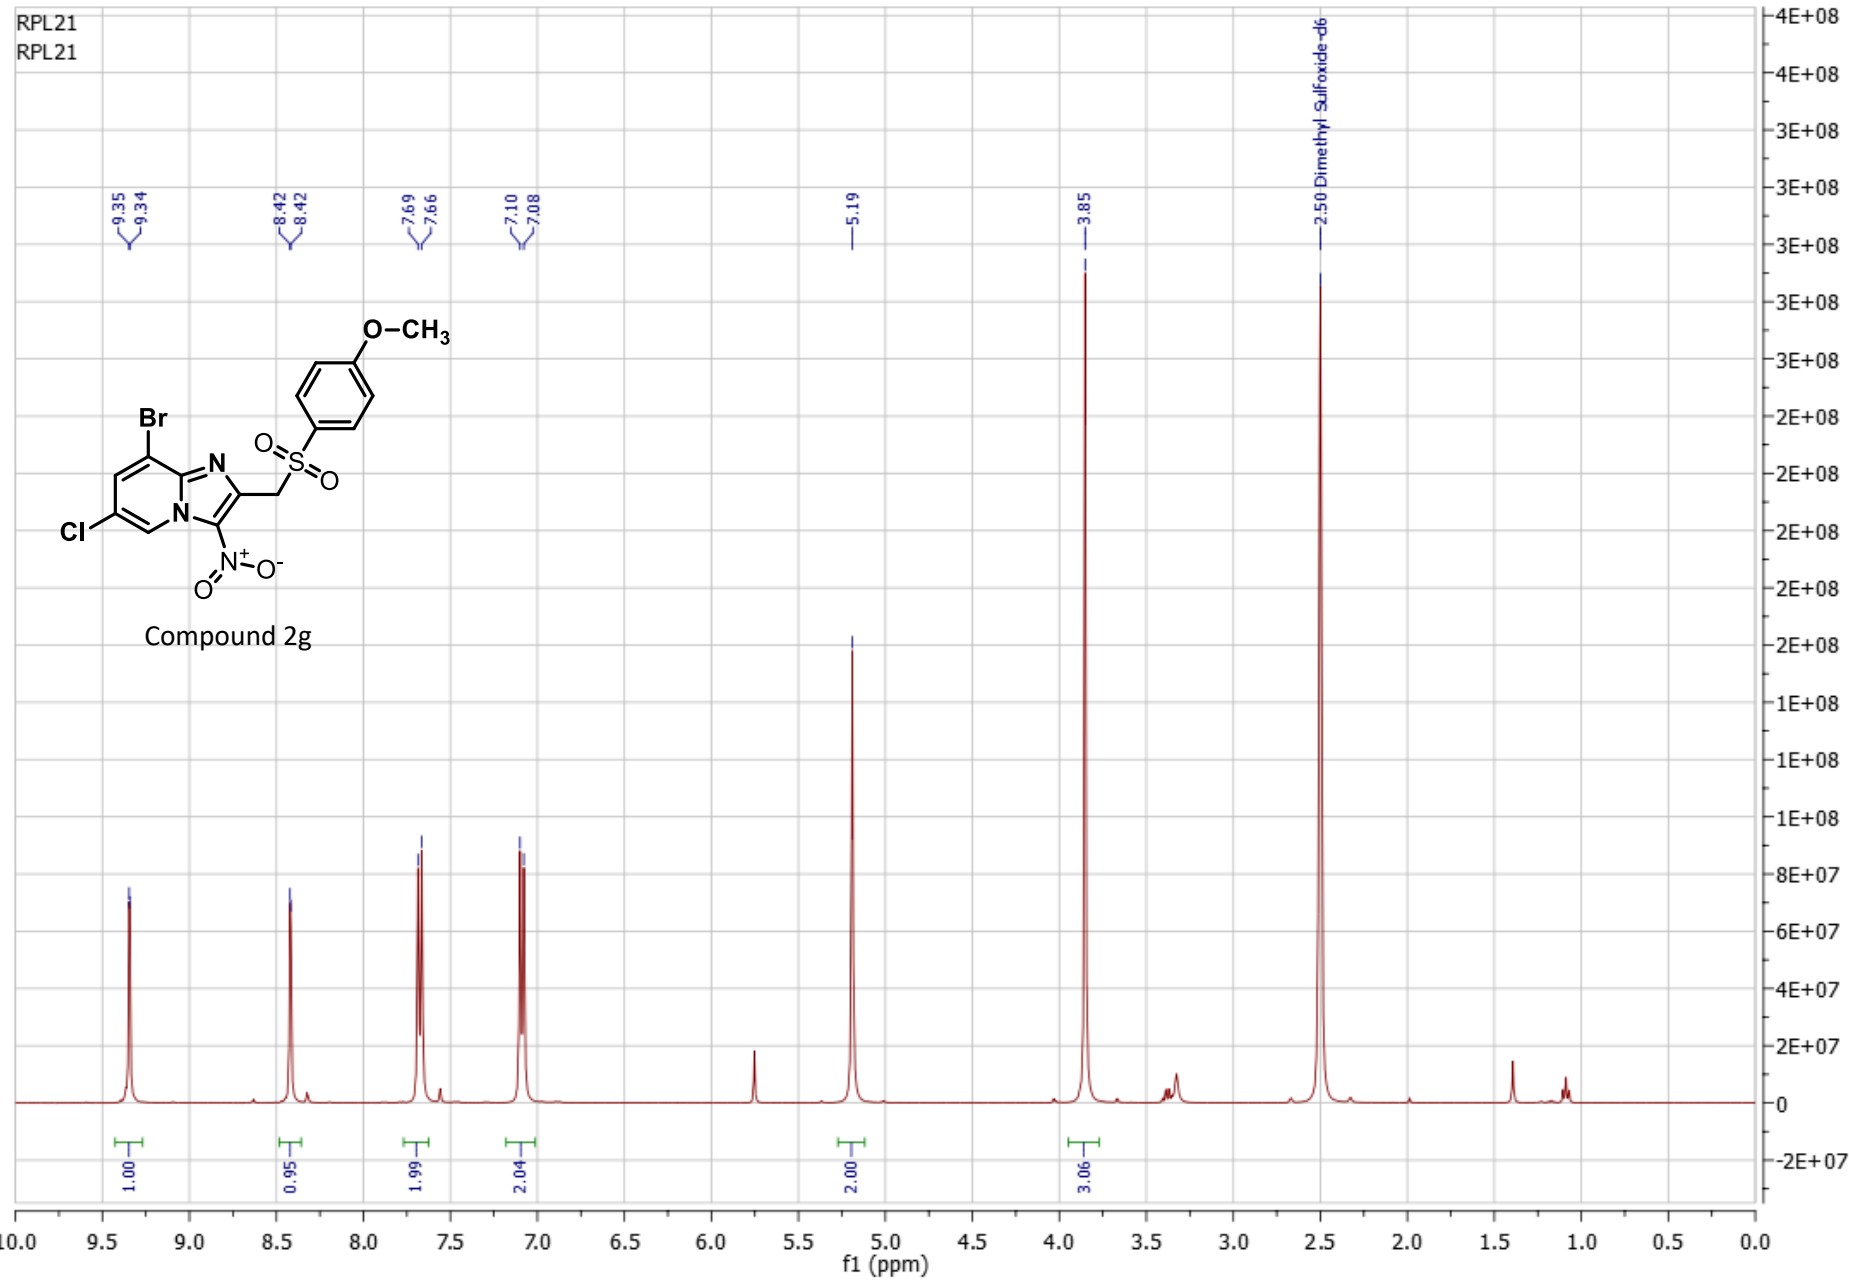

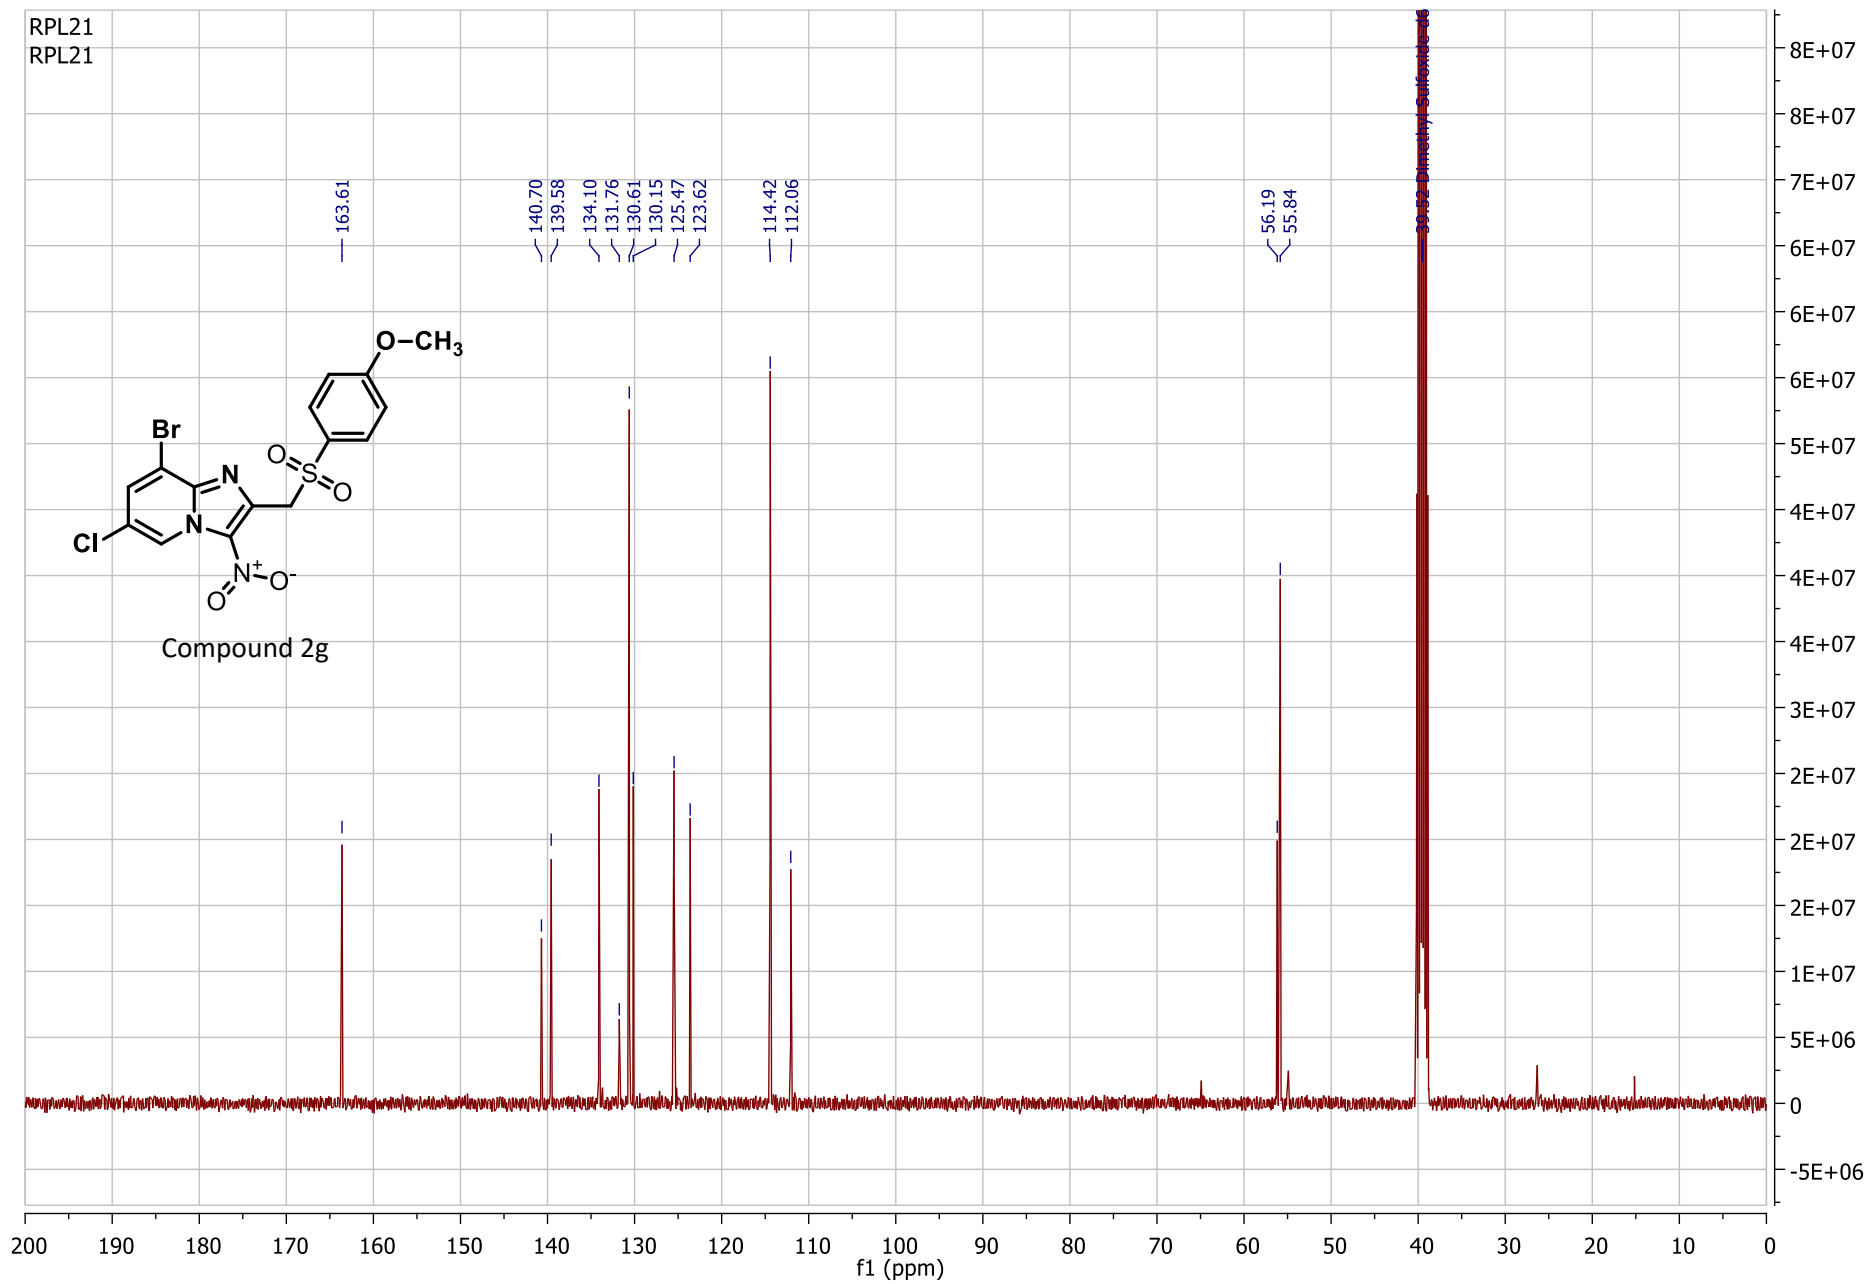

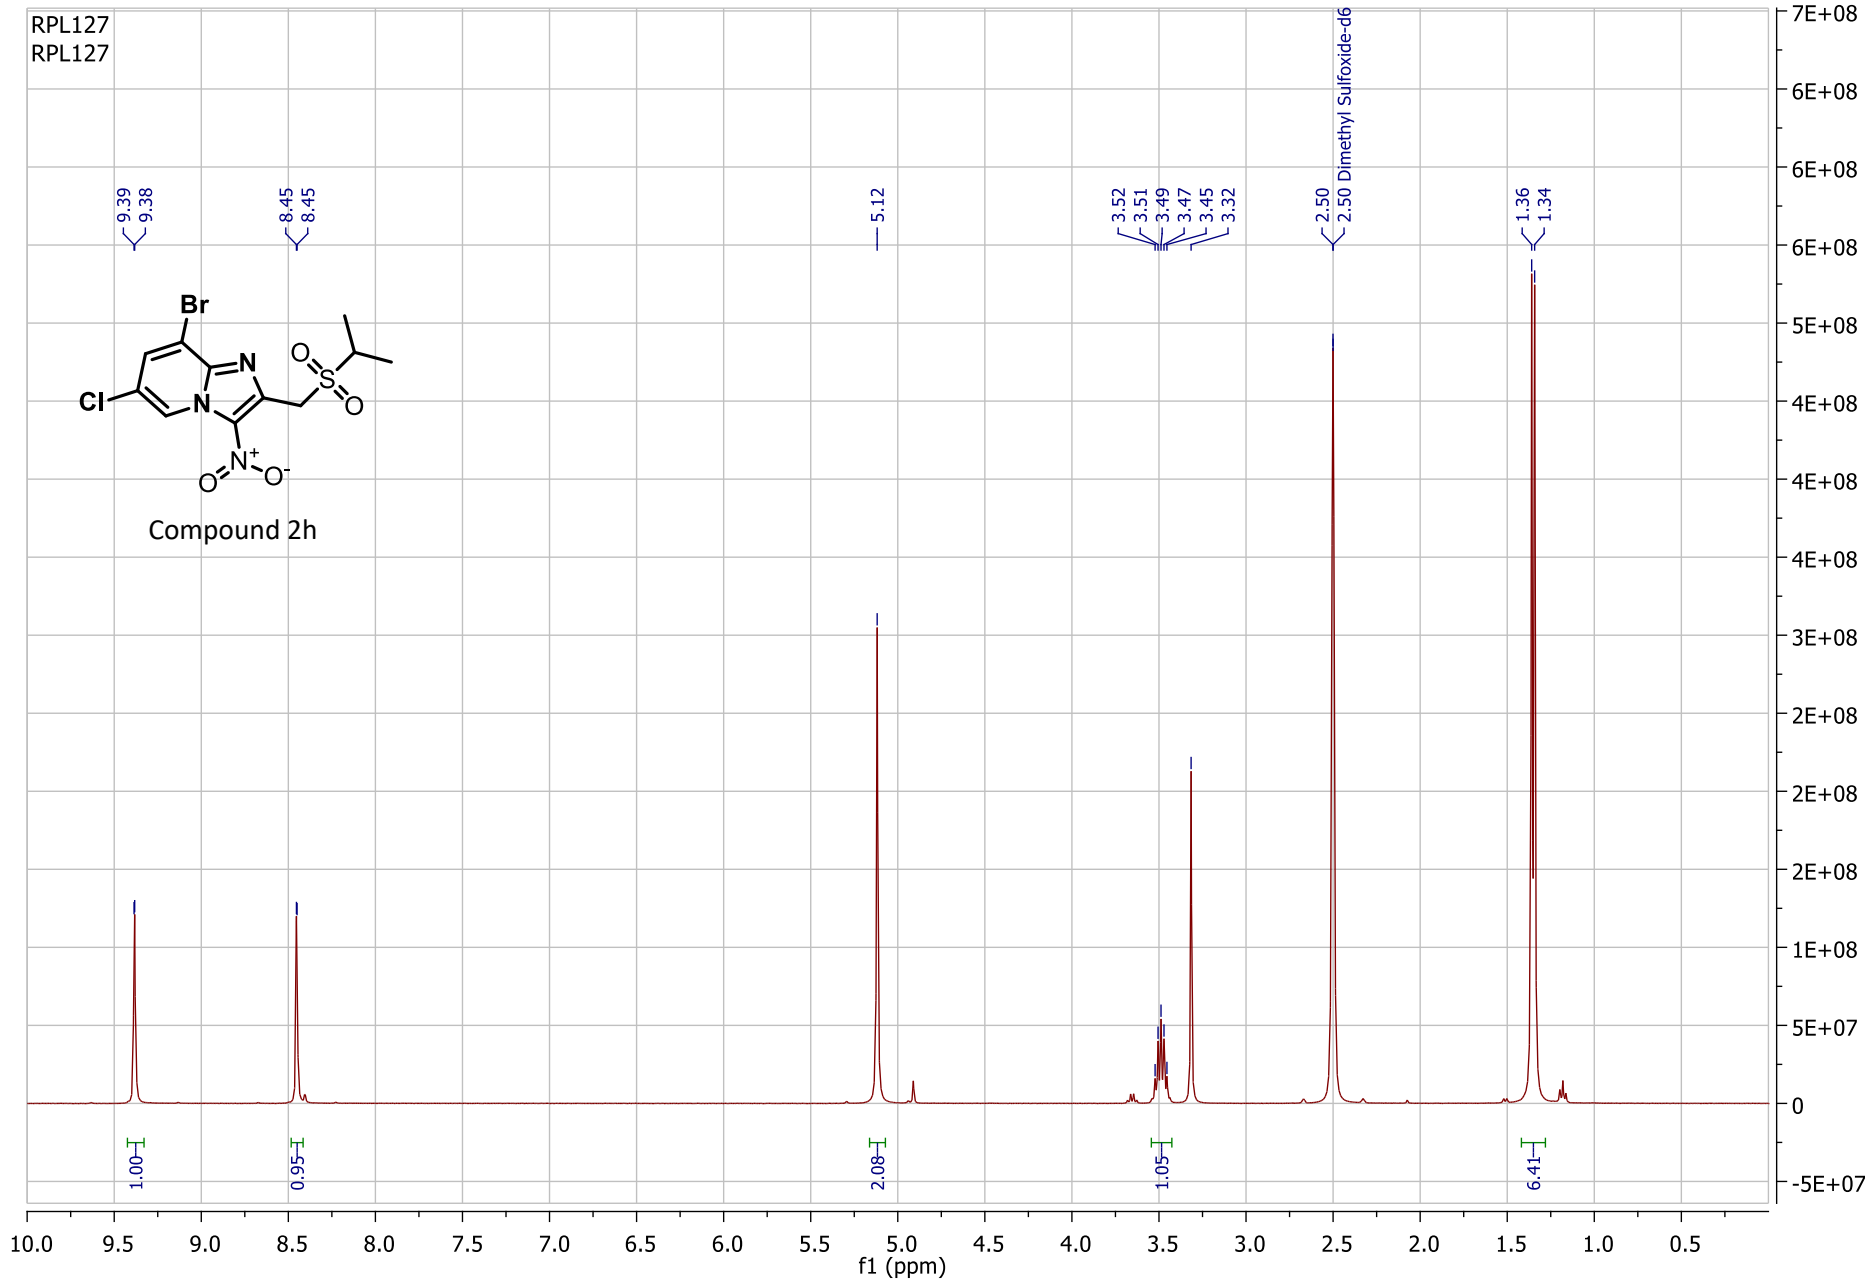



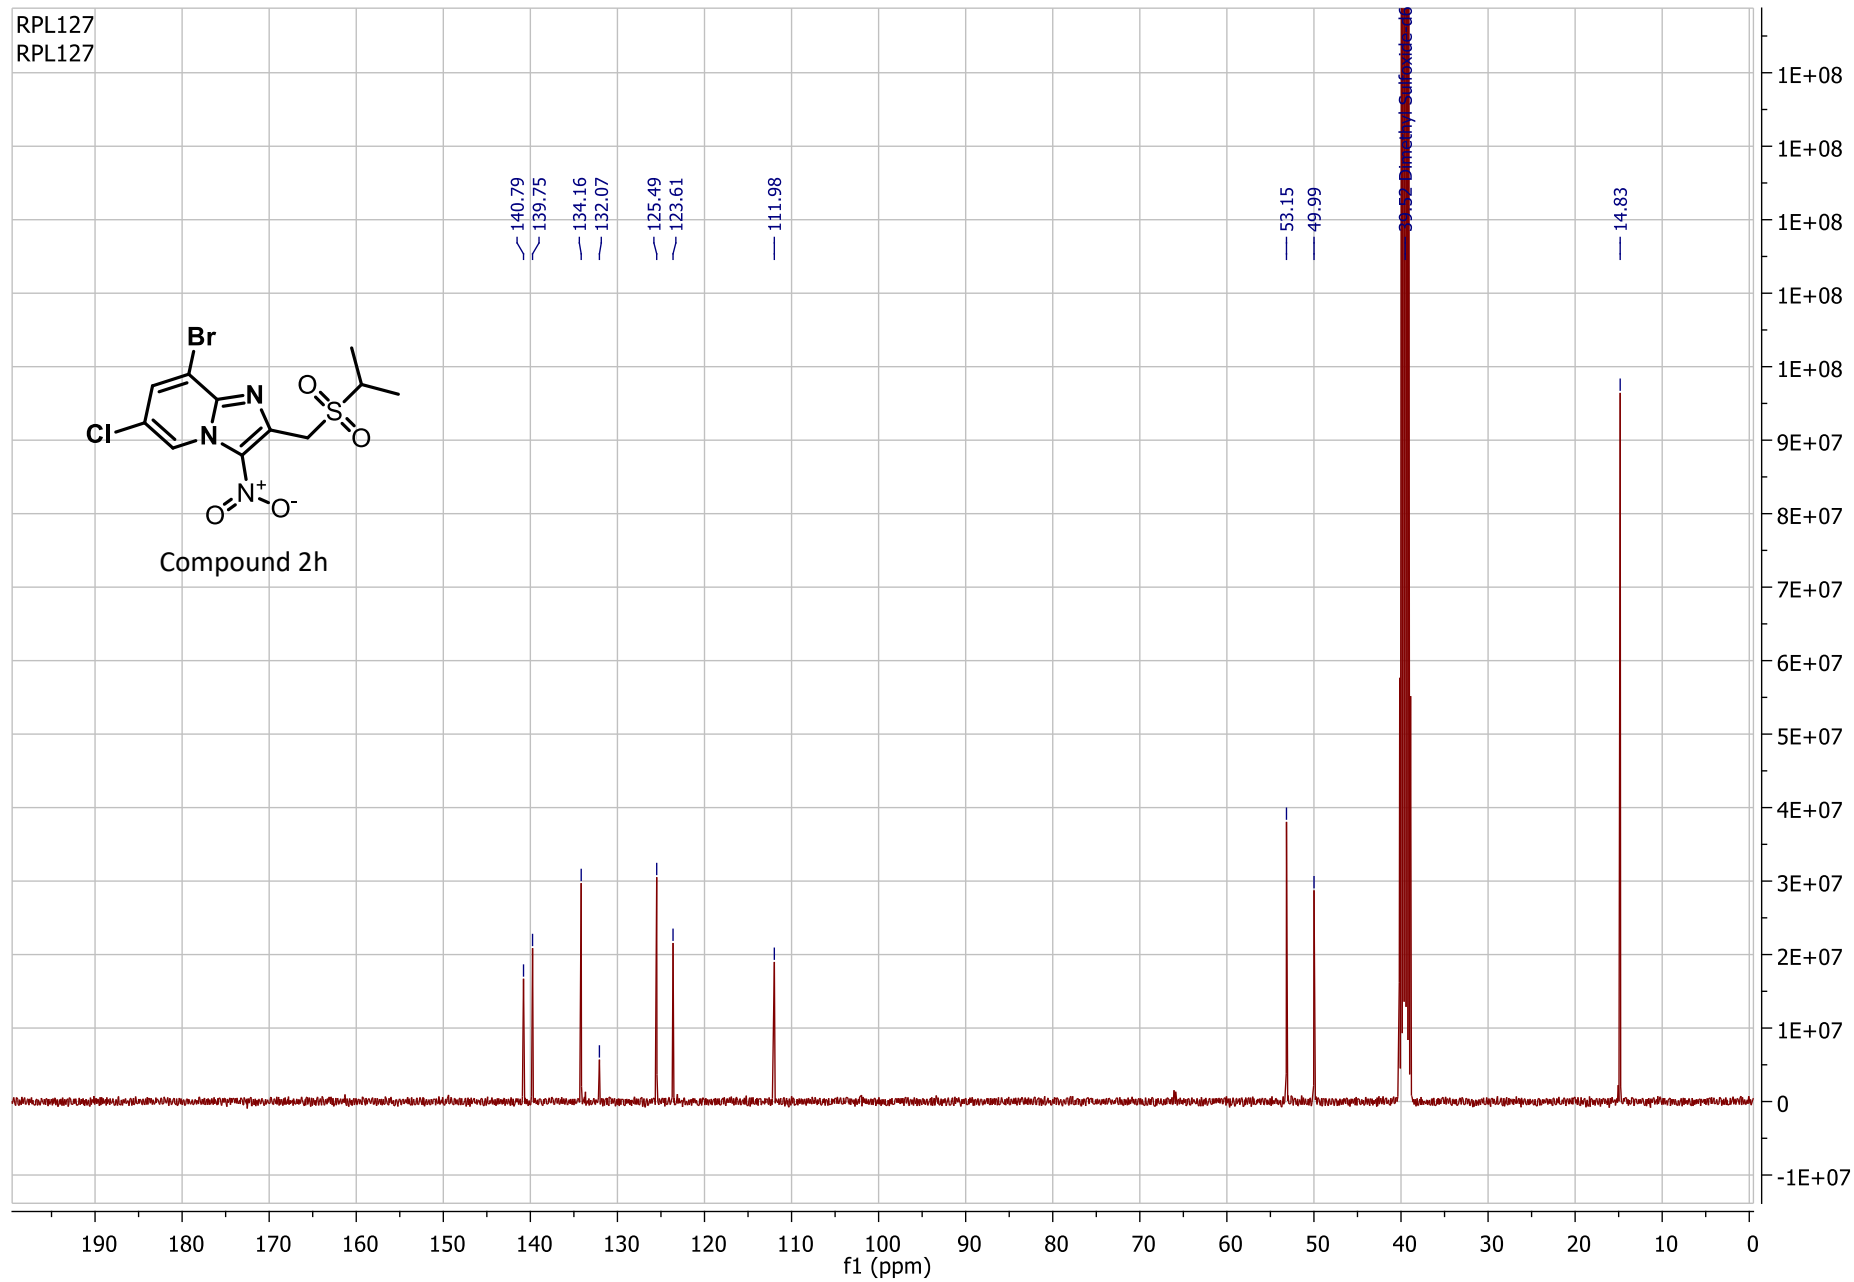

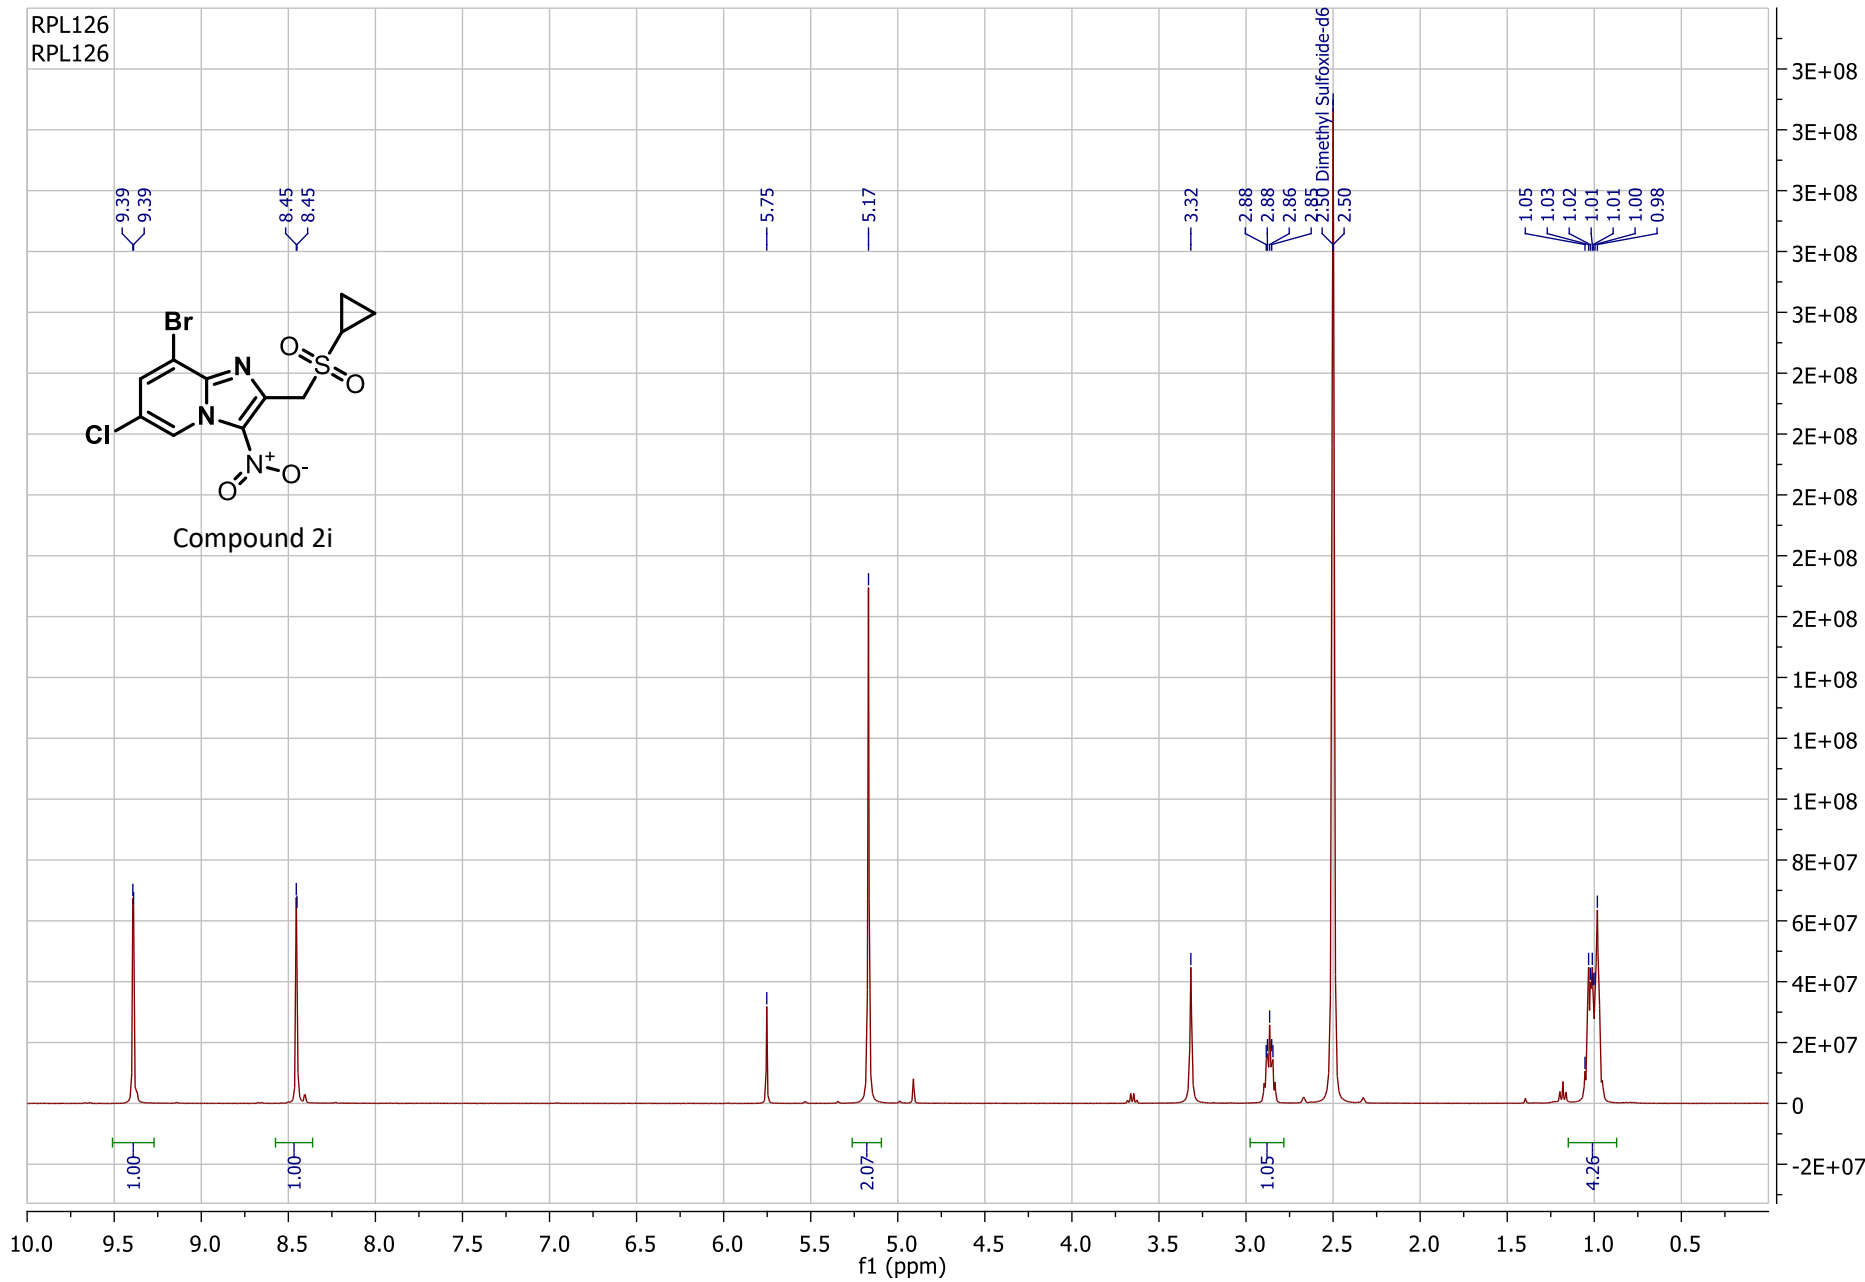

RPL126  
RPL126

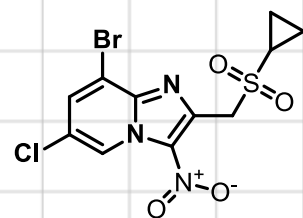

Compound 2i

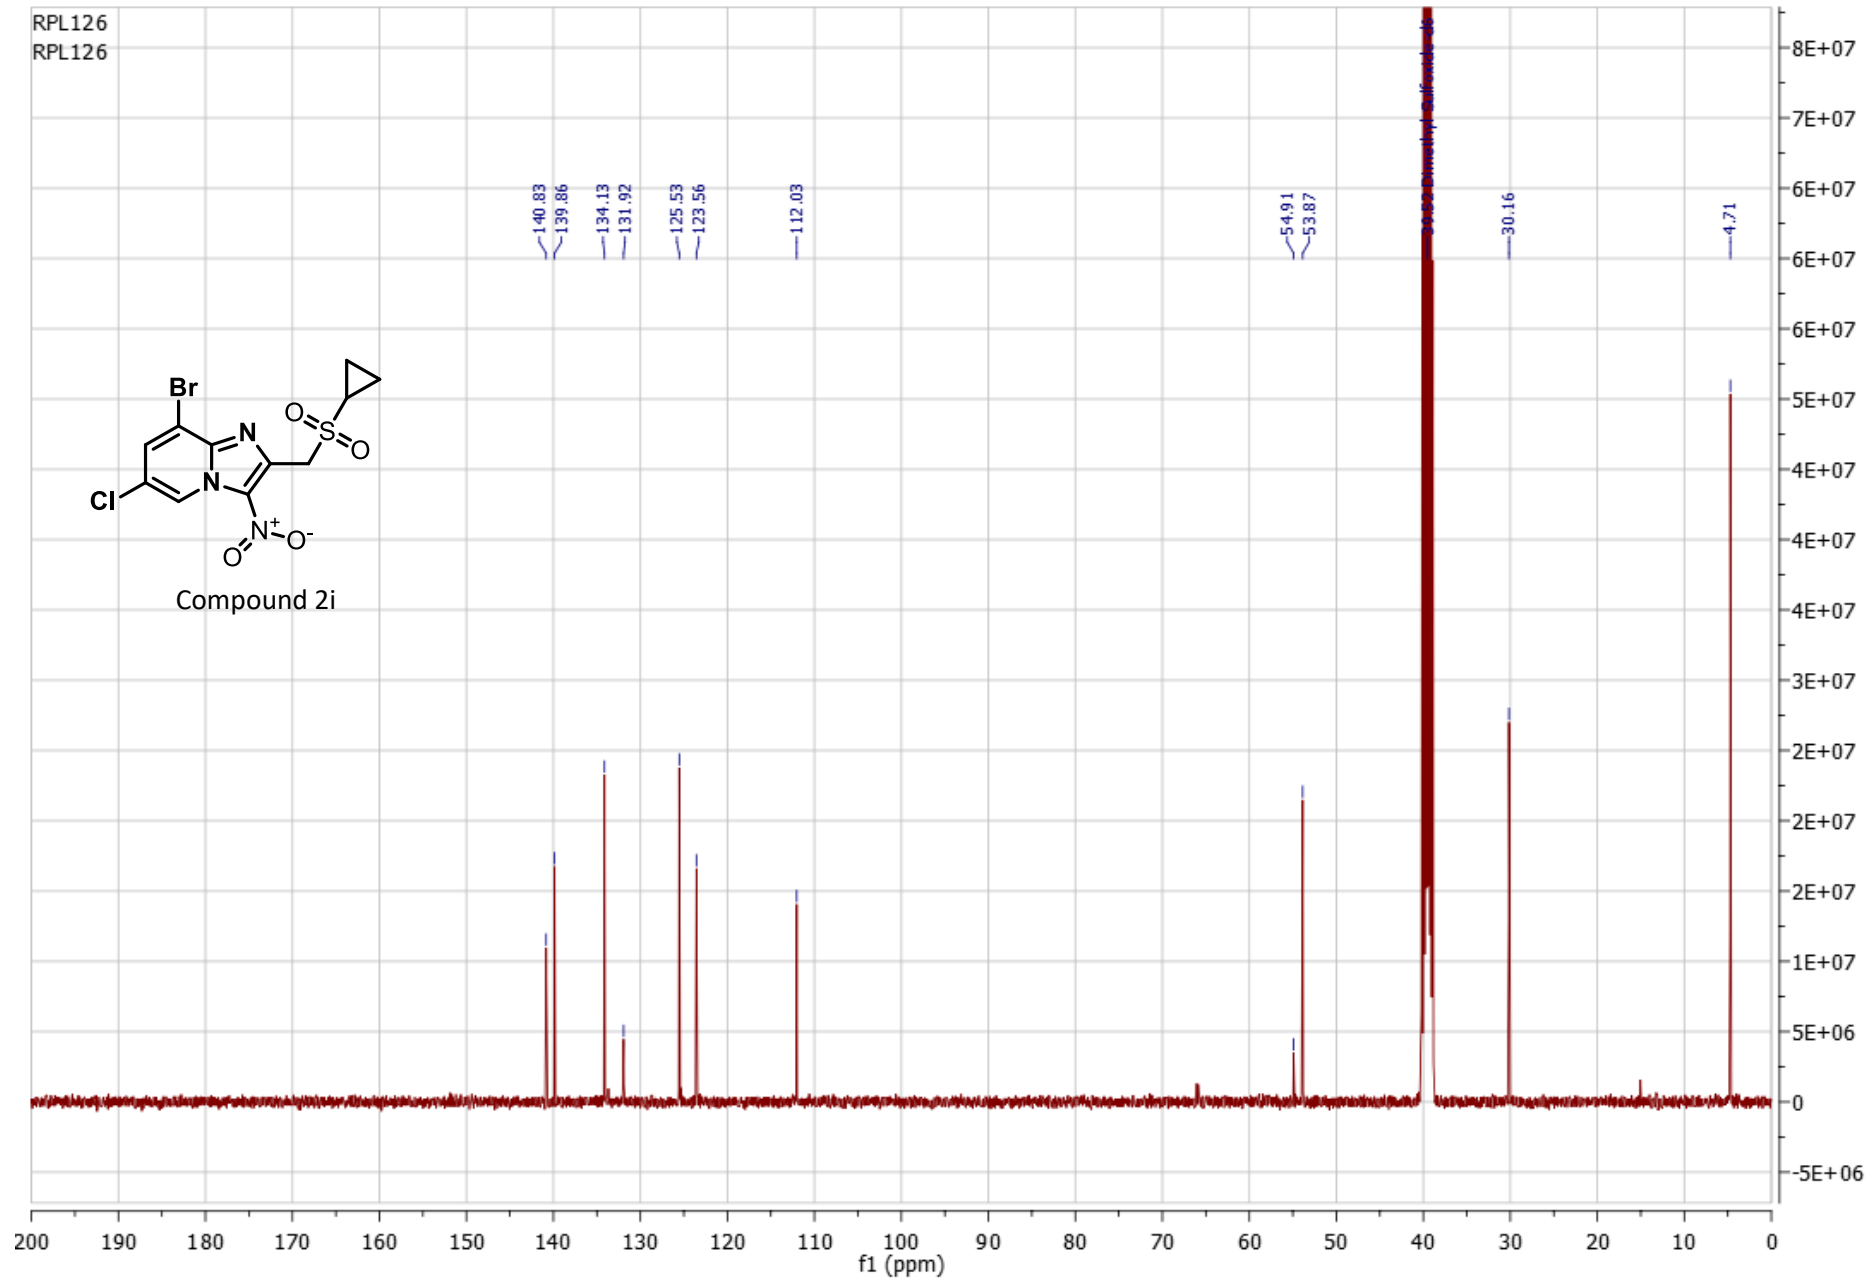

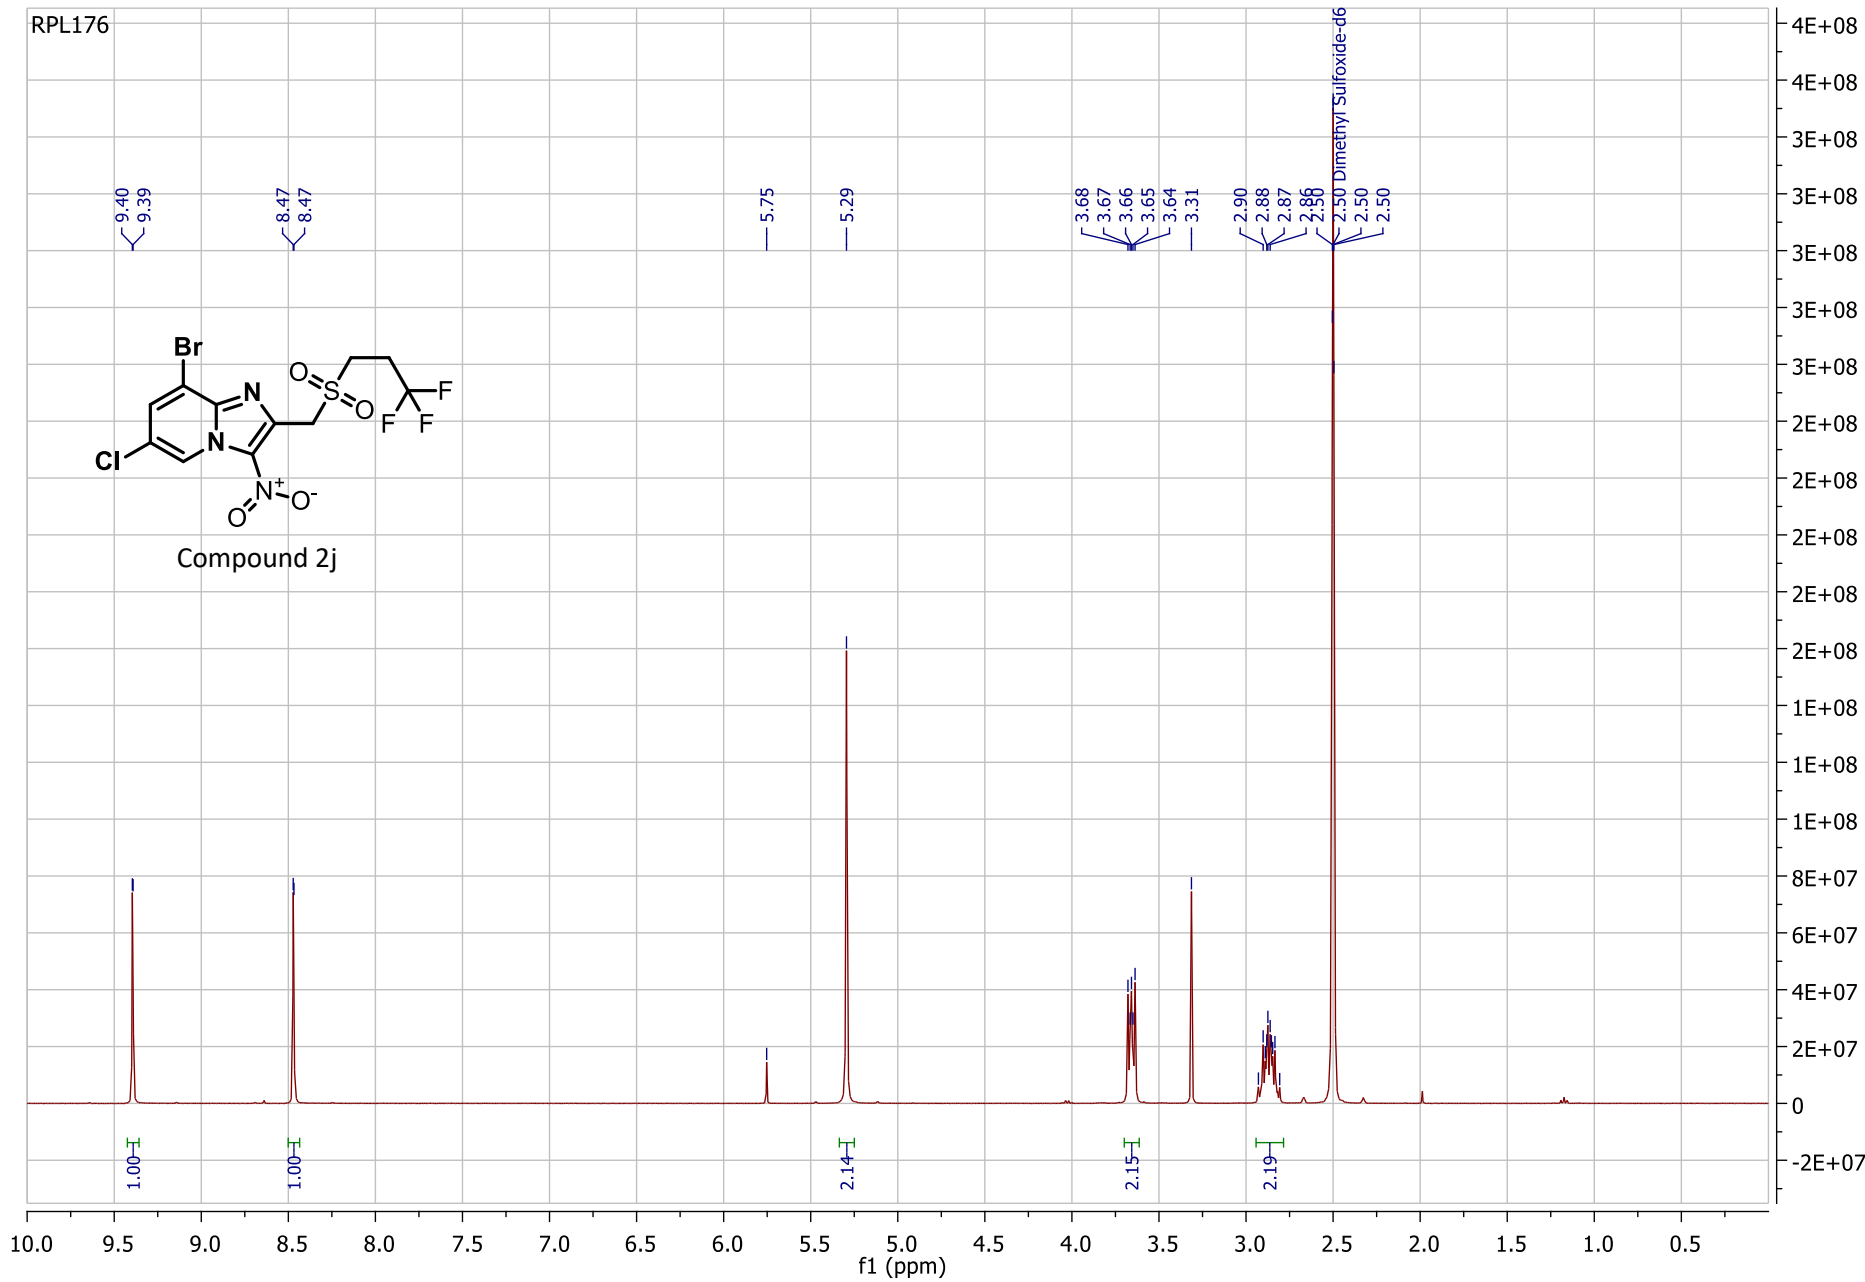

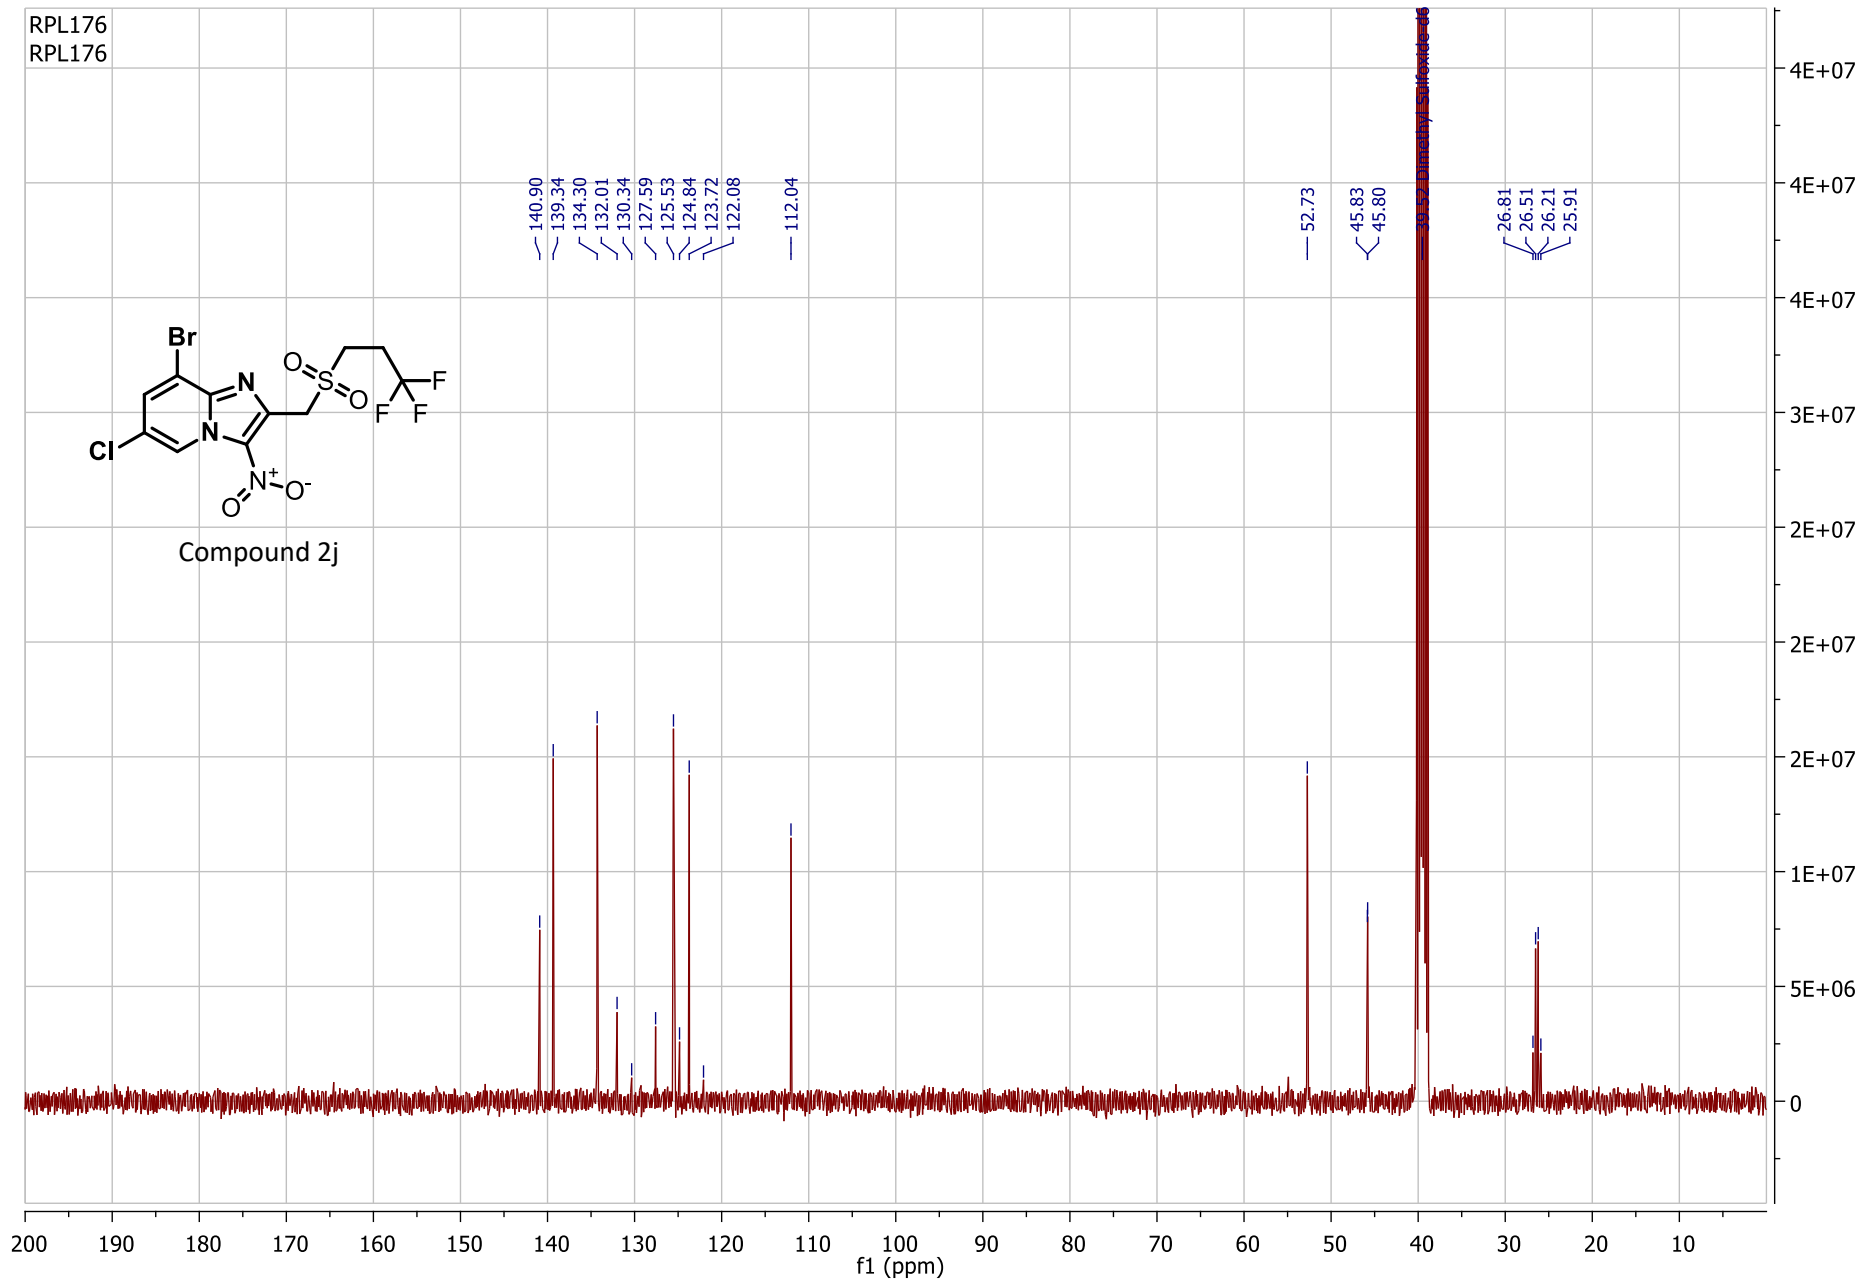

RPL54

Proton-16scans DMSO /opt/topspin3.2 terme 73

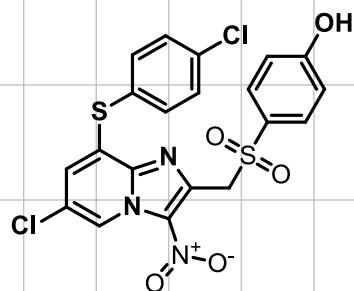

Compound 3a

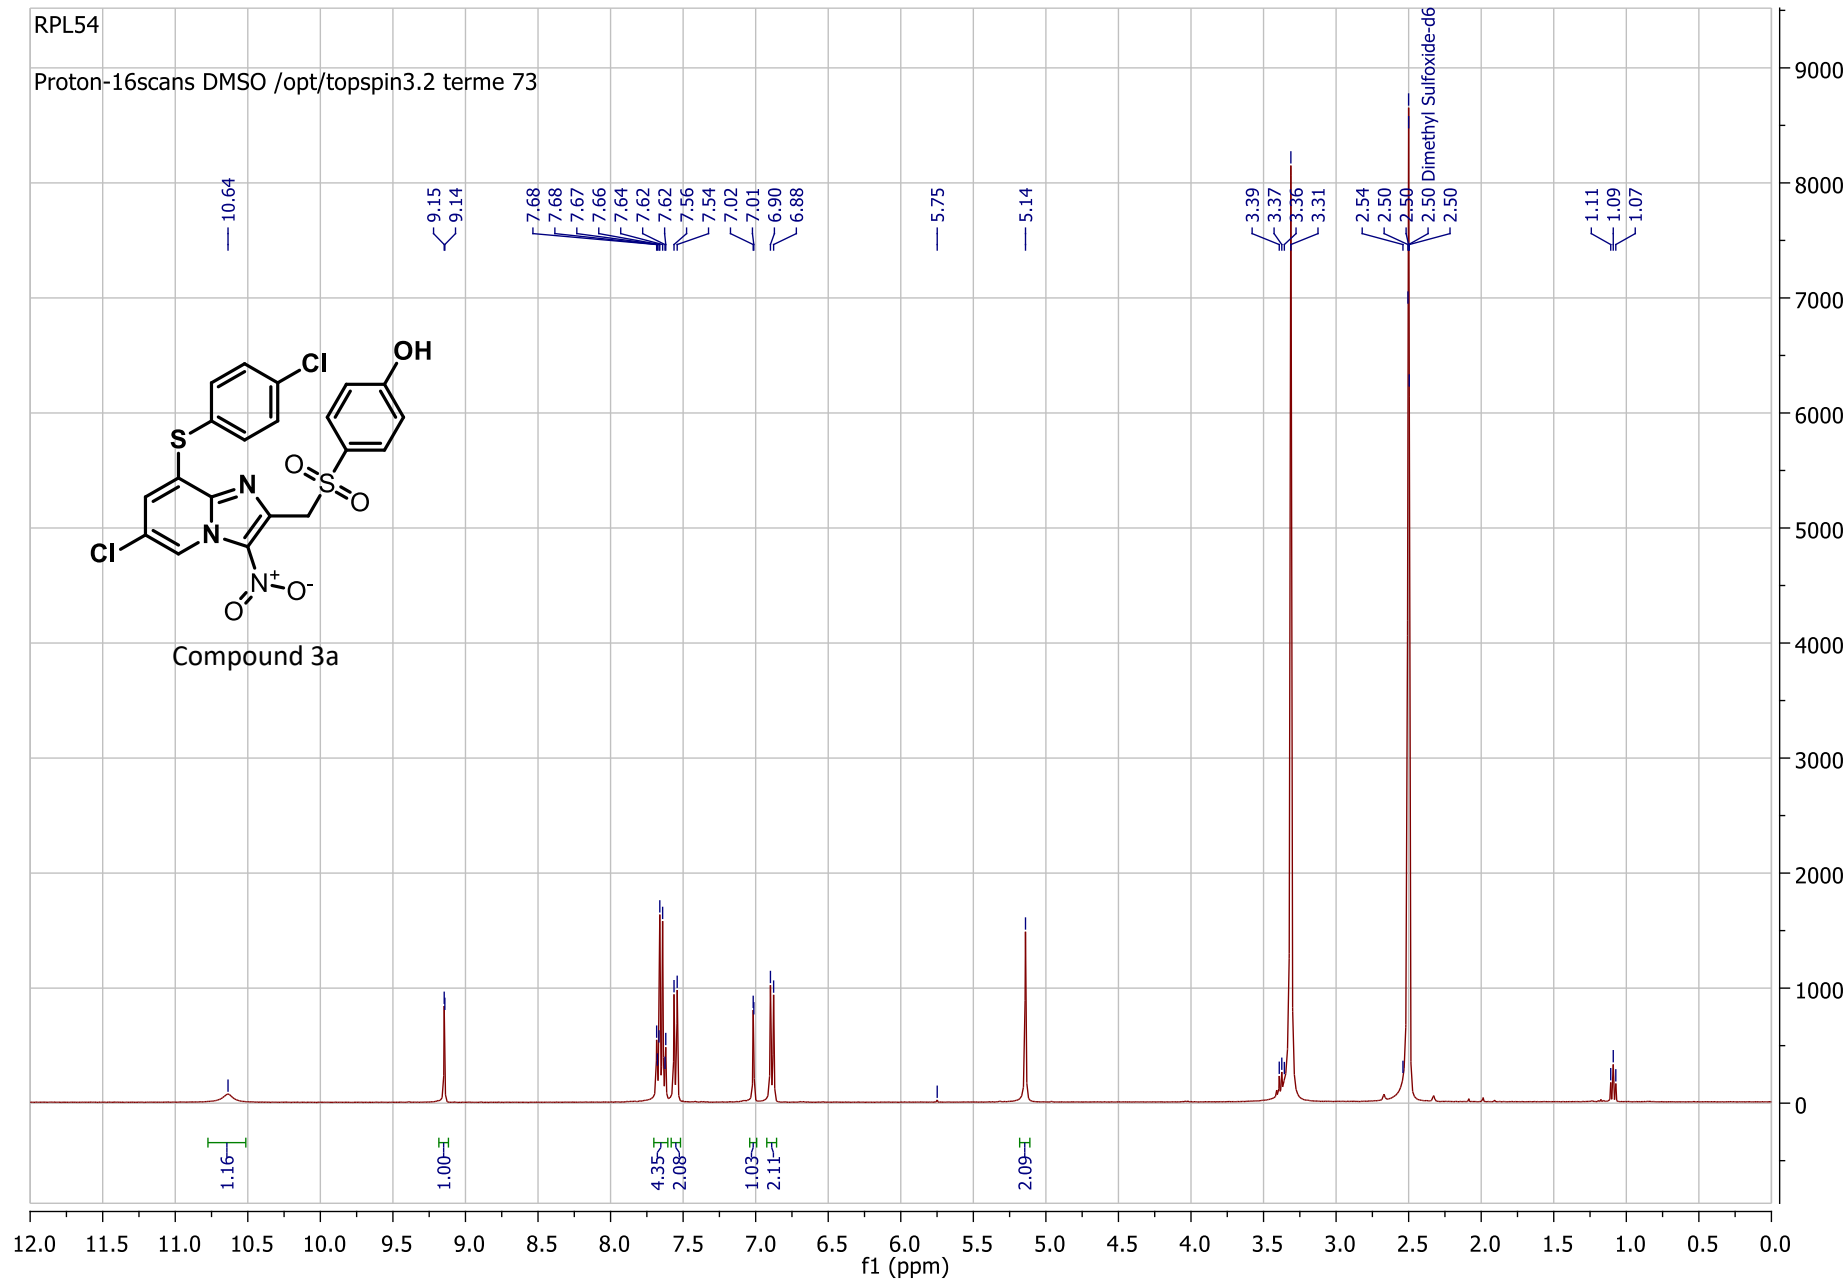

RPL54

C13CPD-nuit DMSO /opt/topspin3.2 terme 6

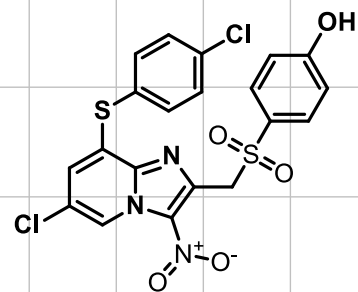

Compound 3a

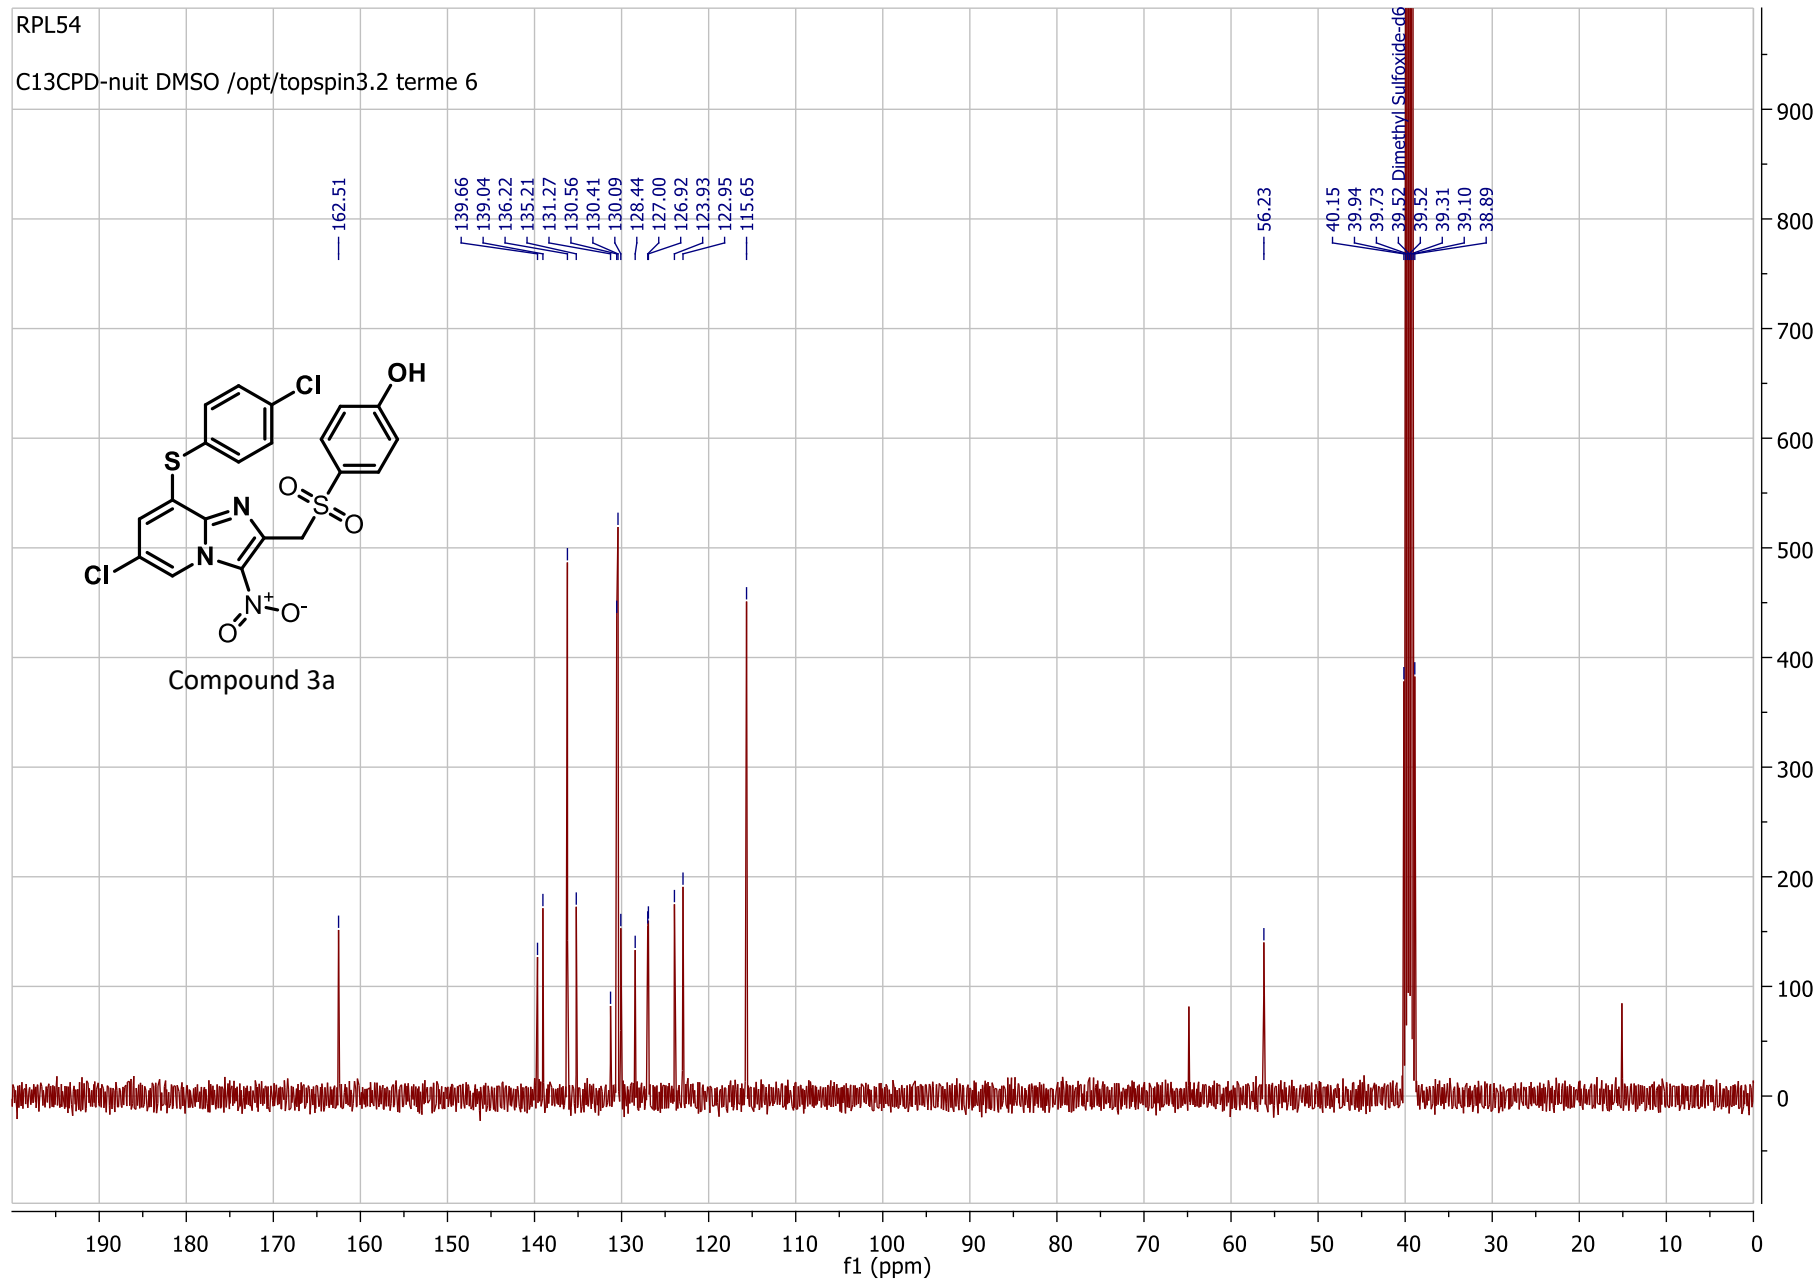

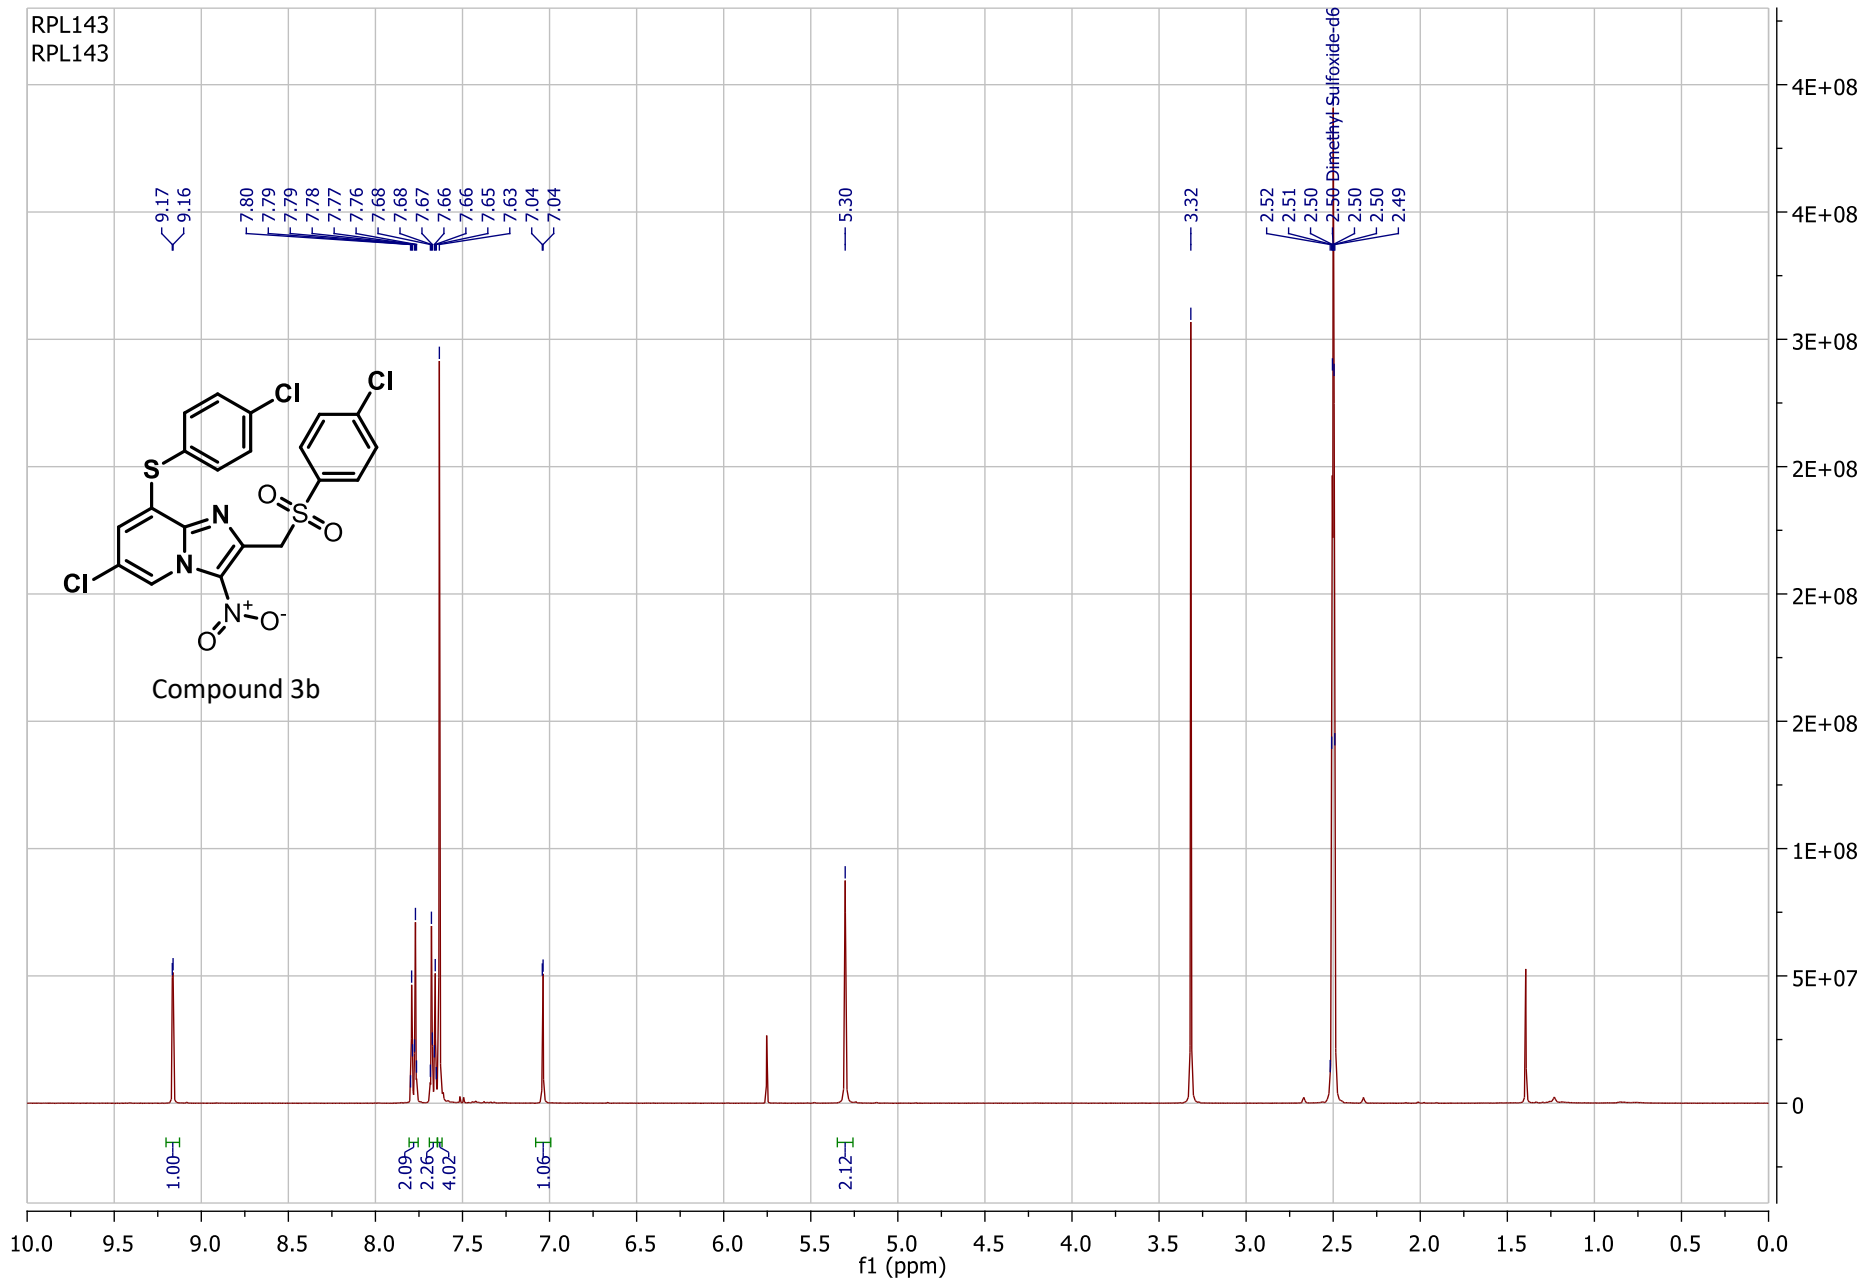



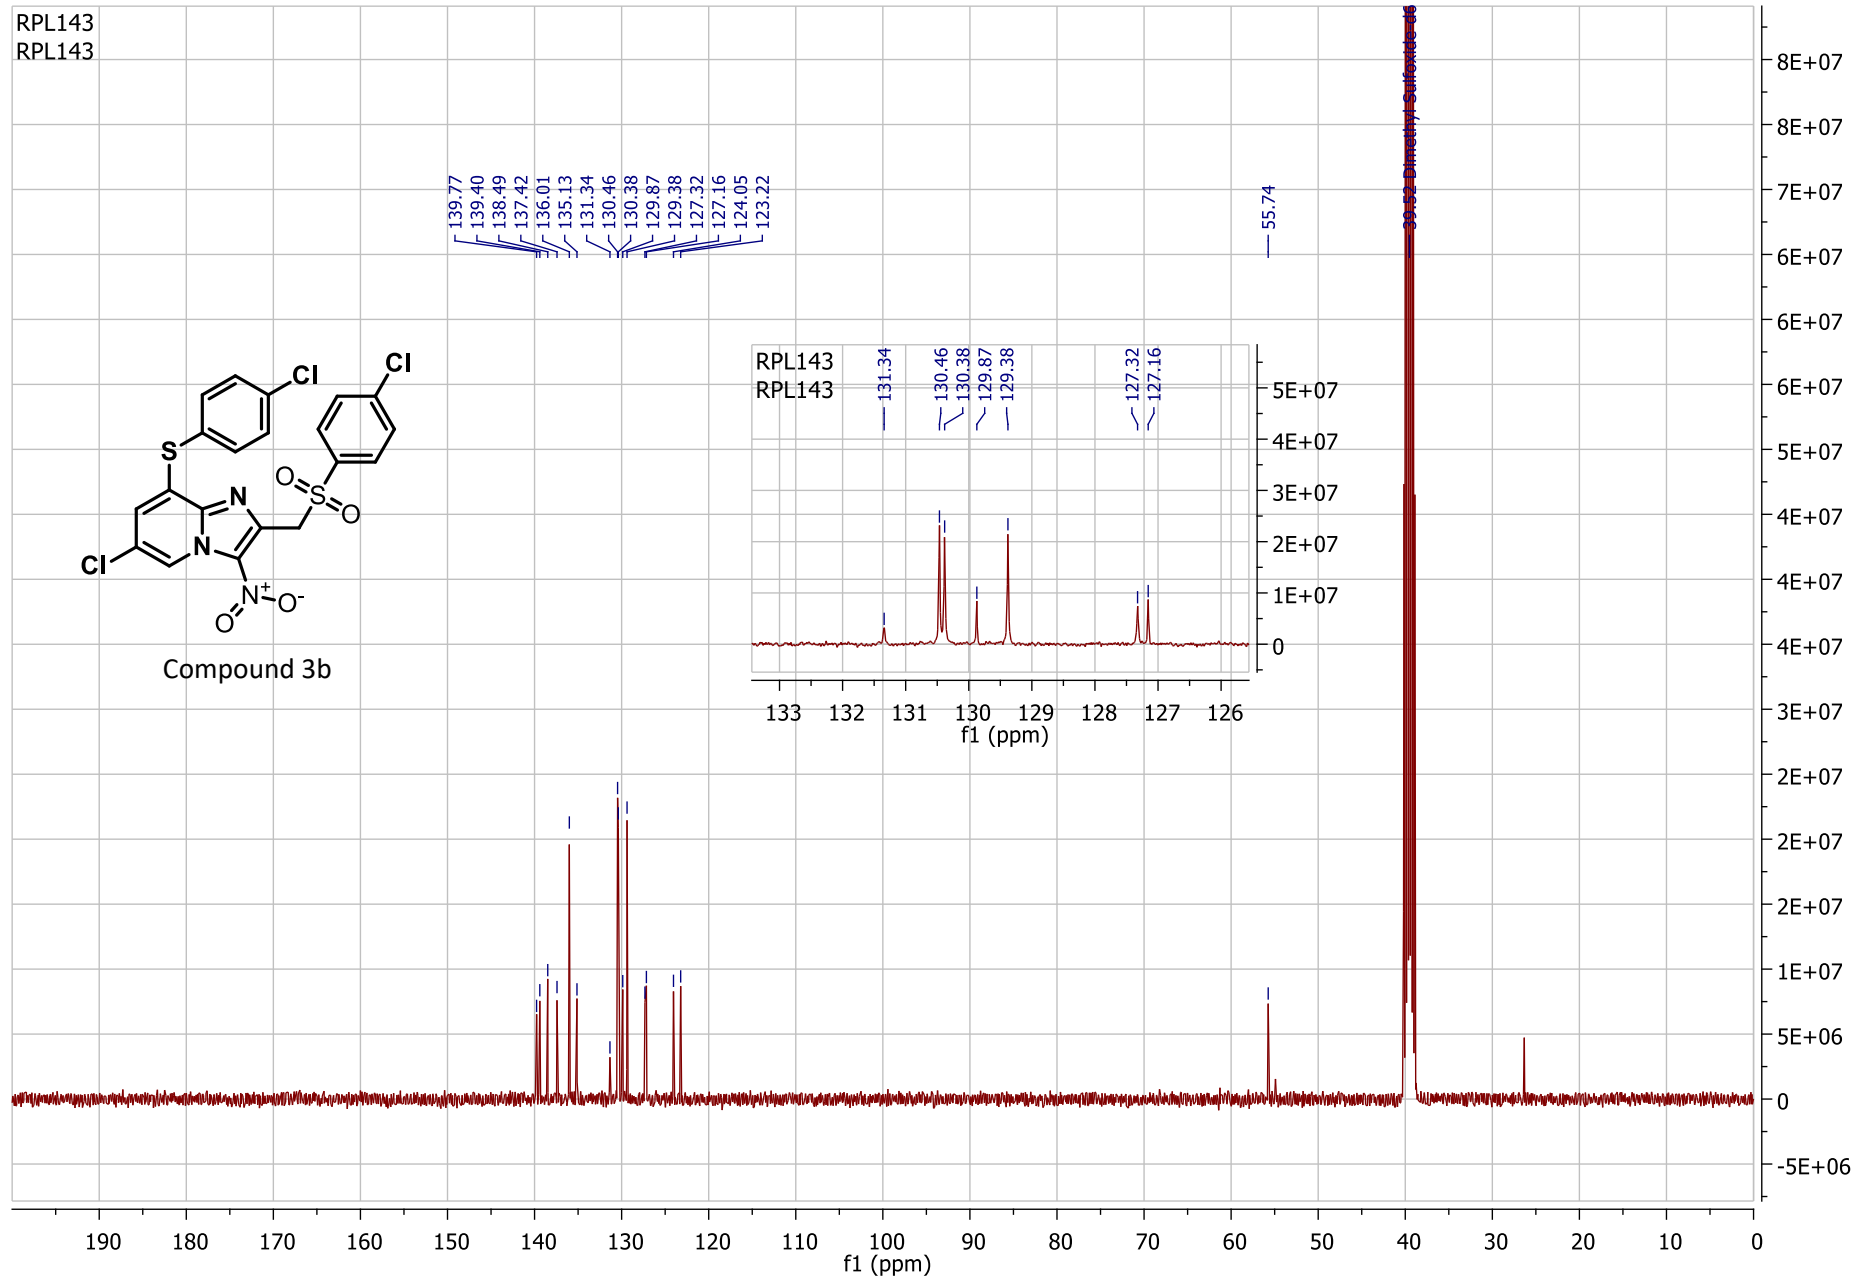

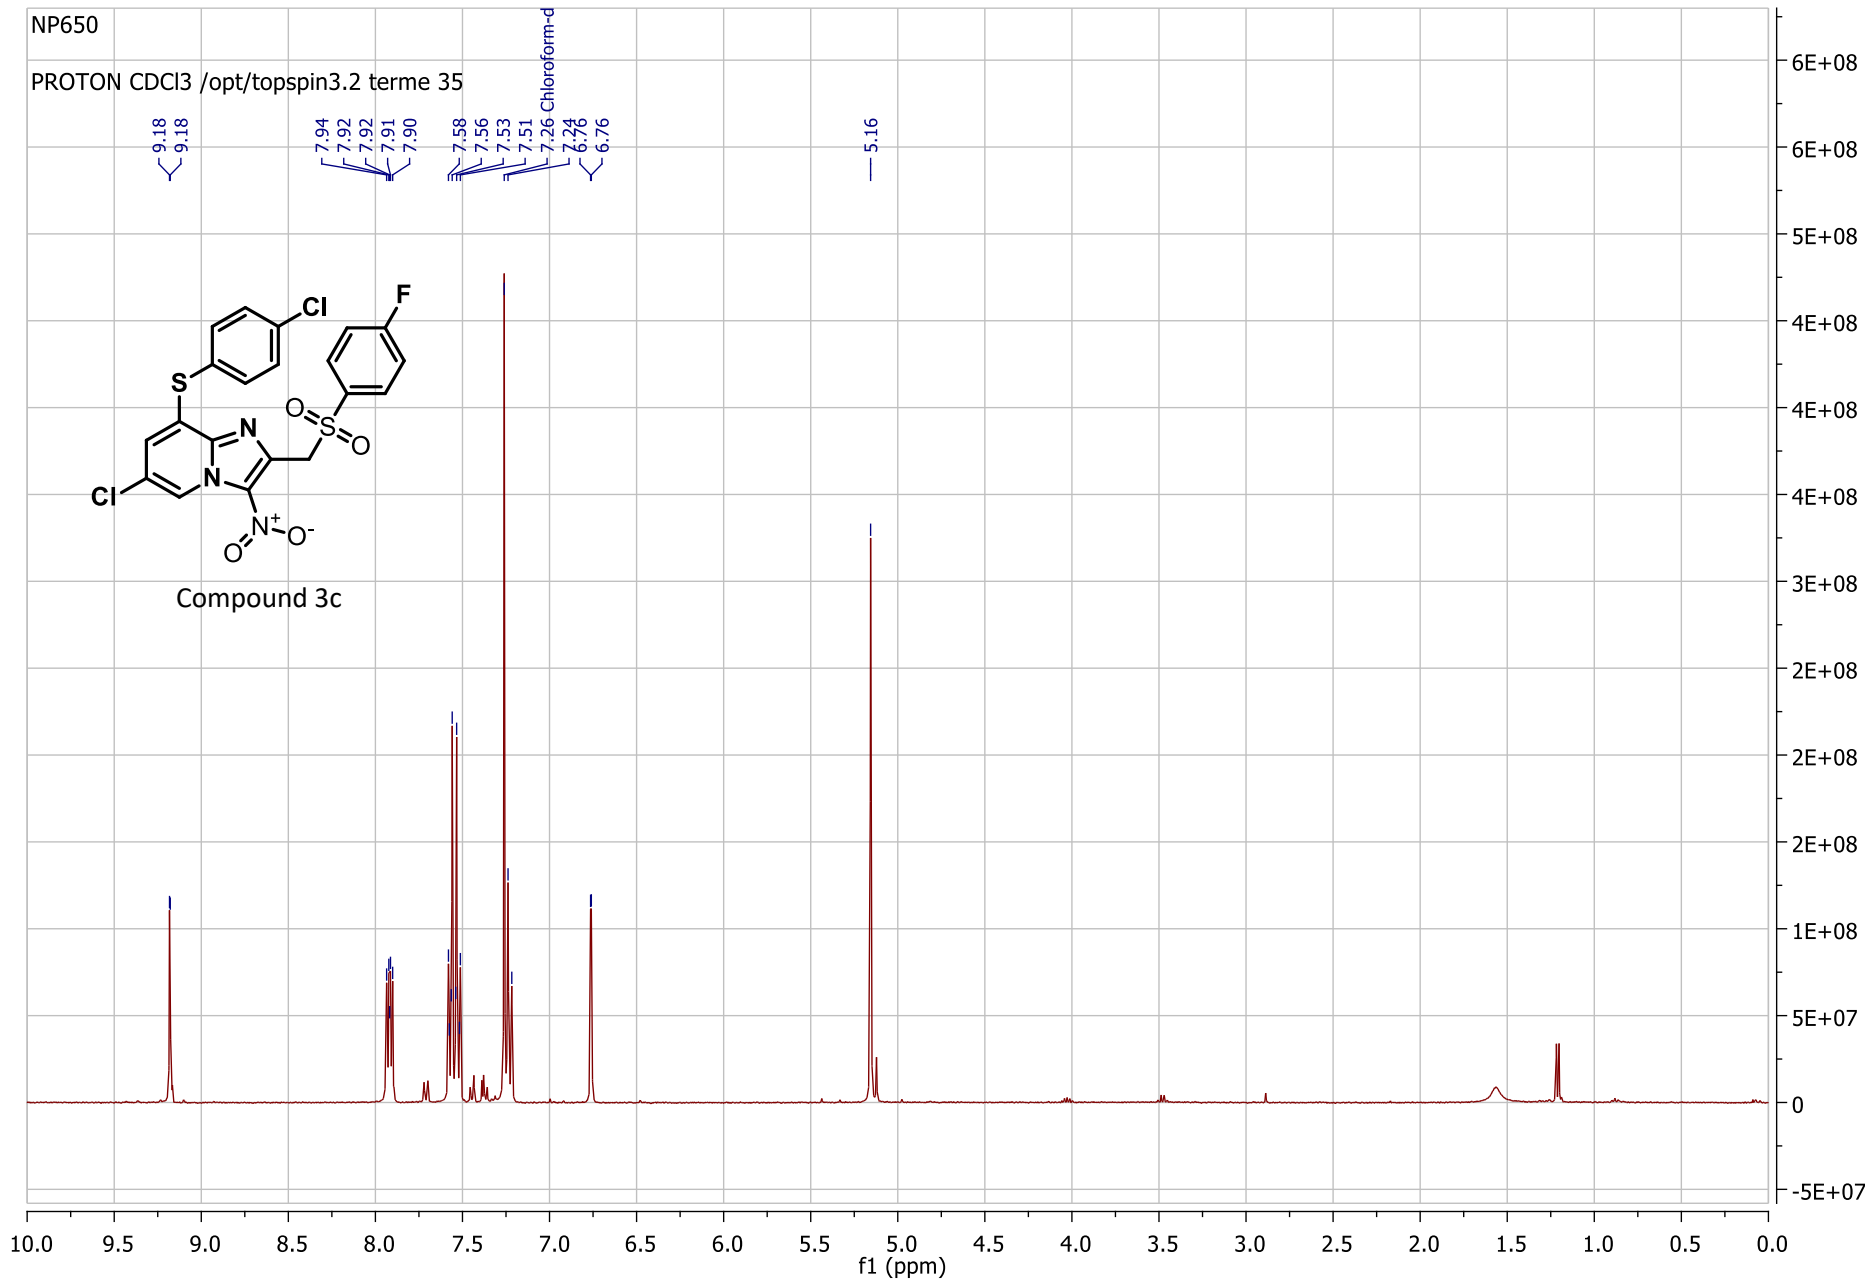

NP650

C13CPD-nuit CDCl3 /opt/topspin3.2 terme 1

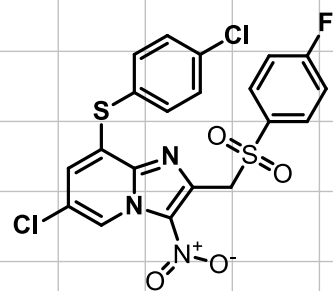

Compound 3c

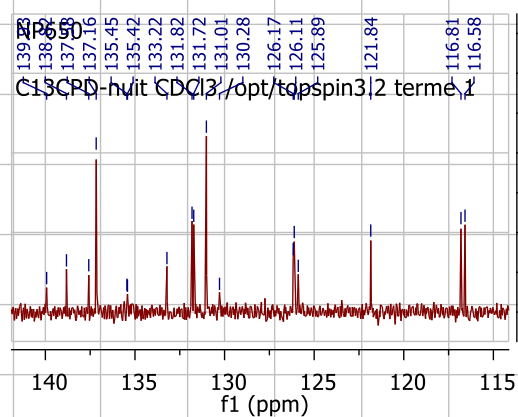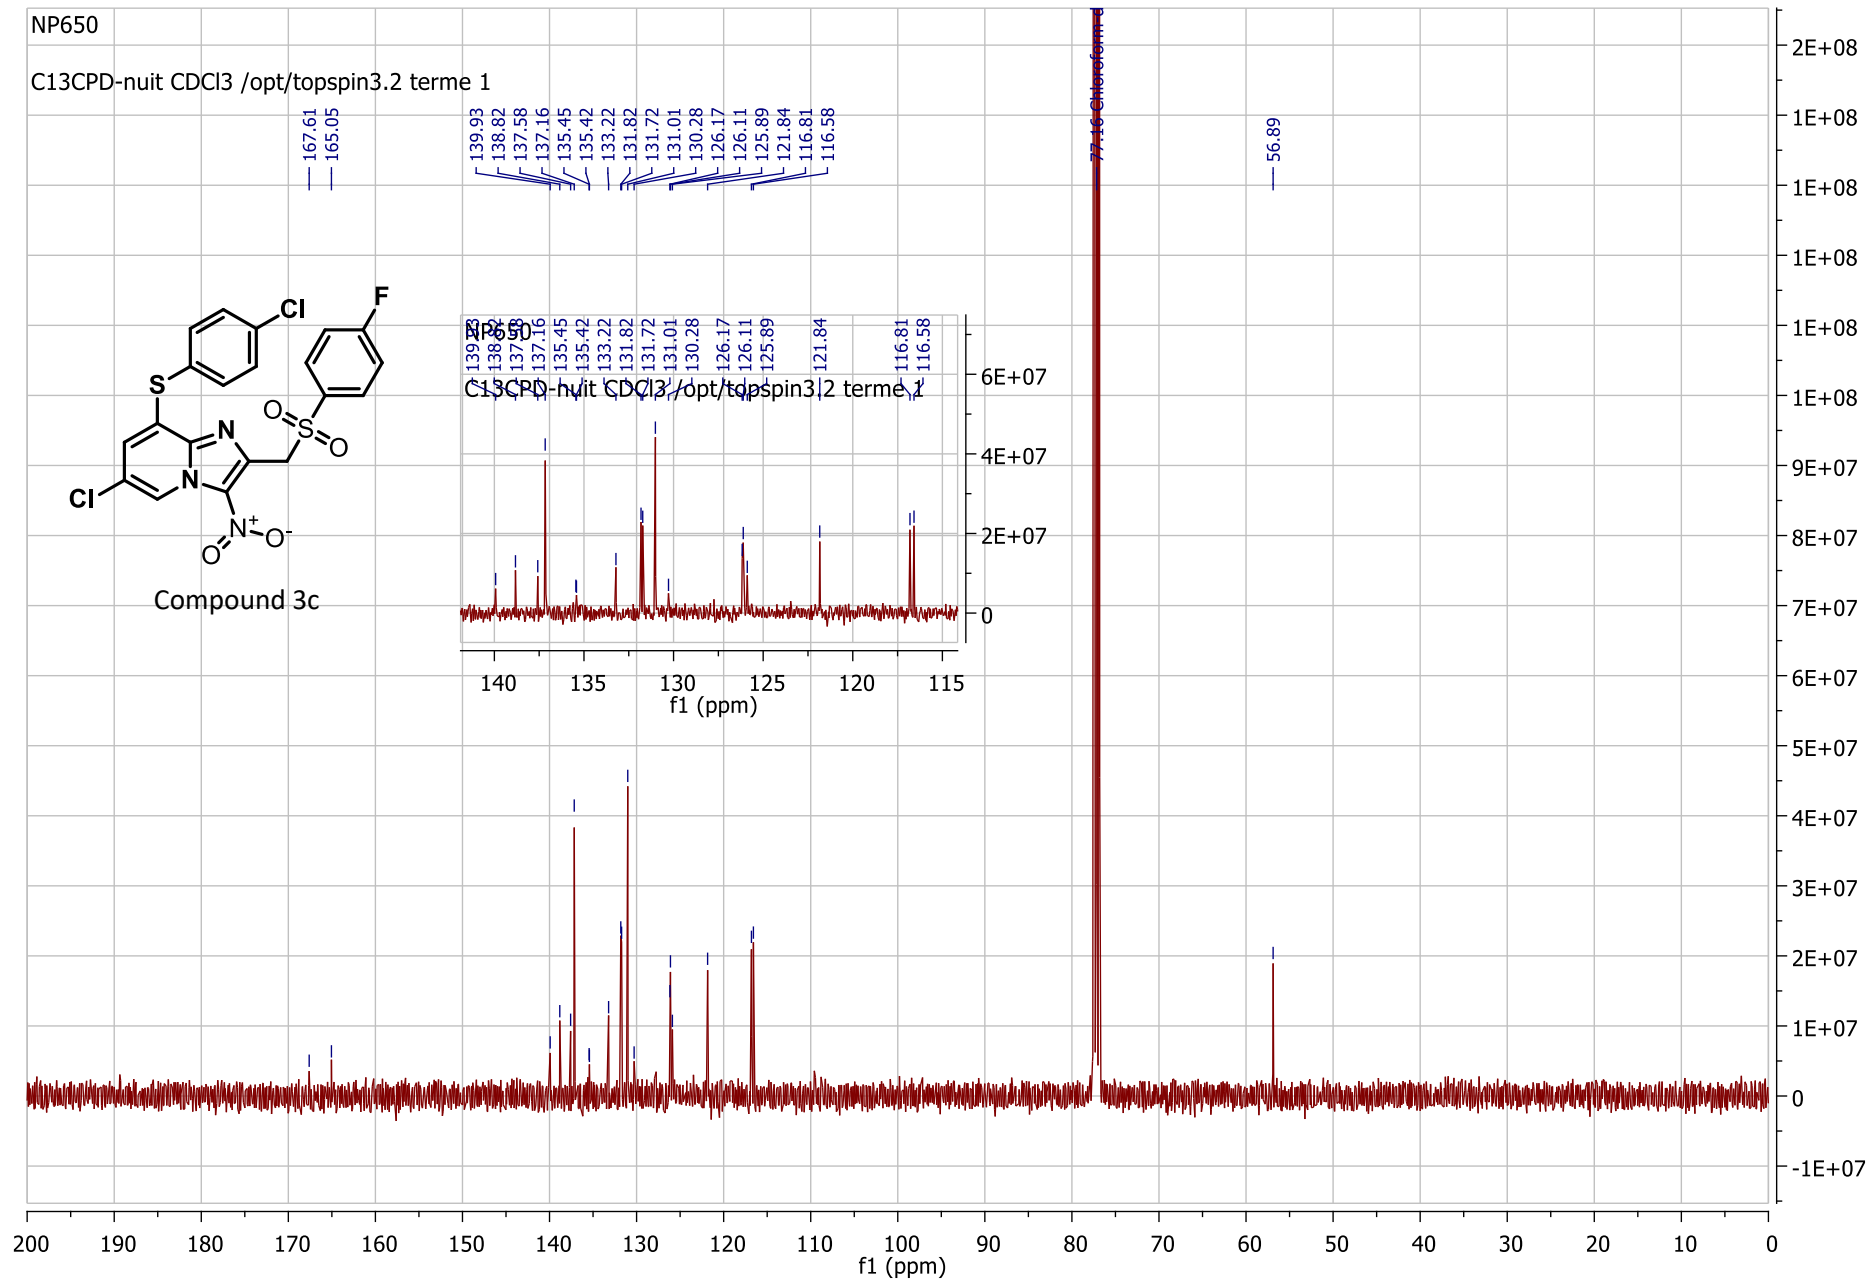

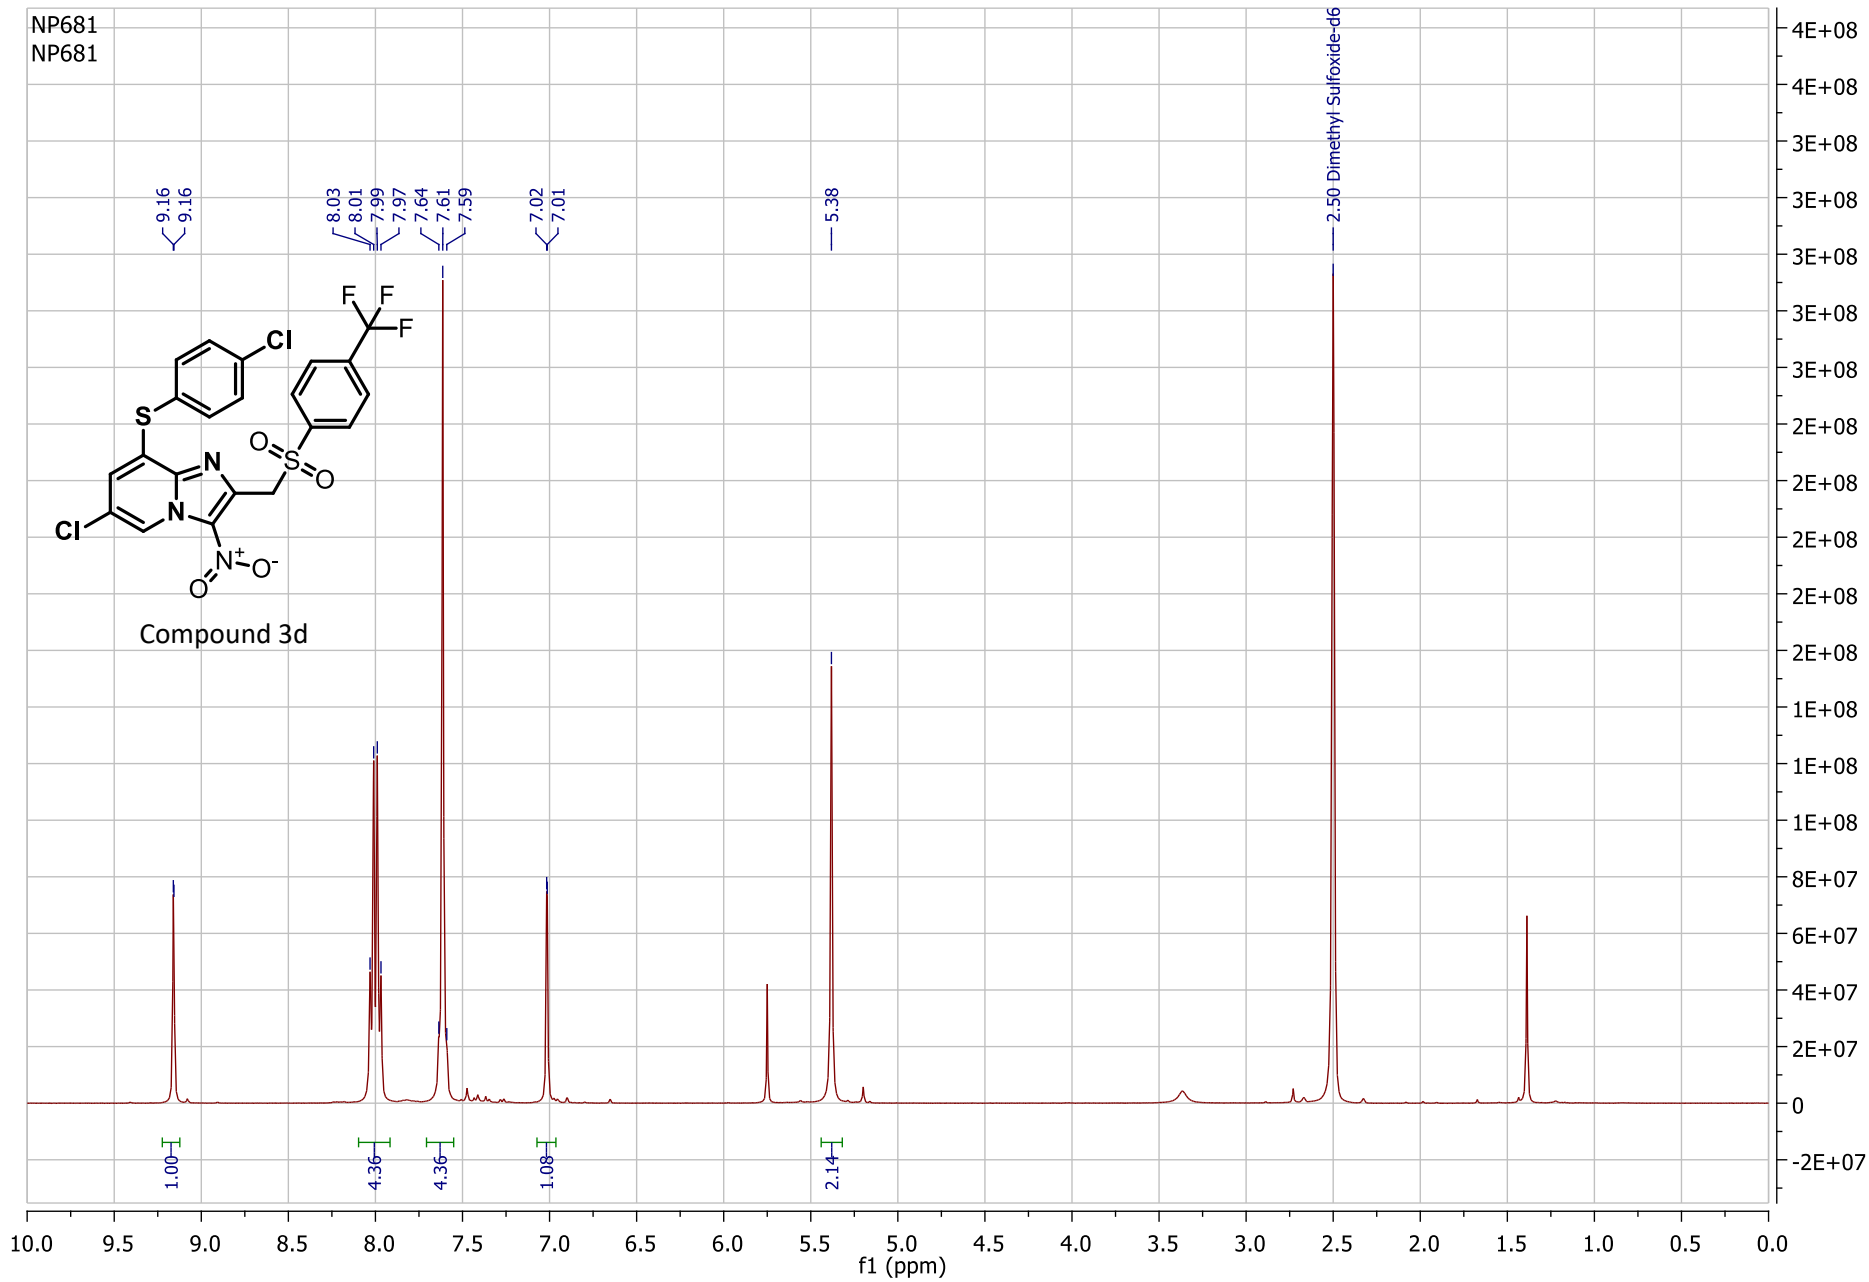

NP681  
NP681

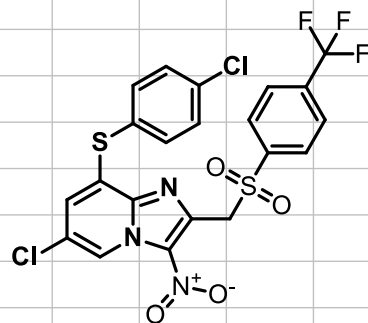

Compound 3d

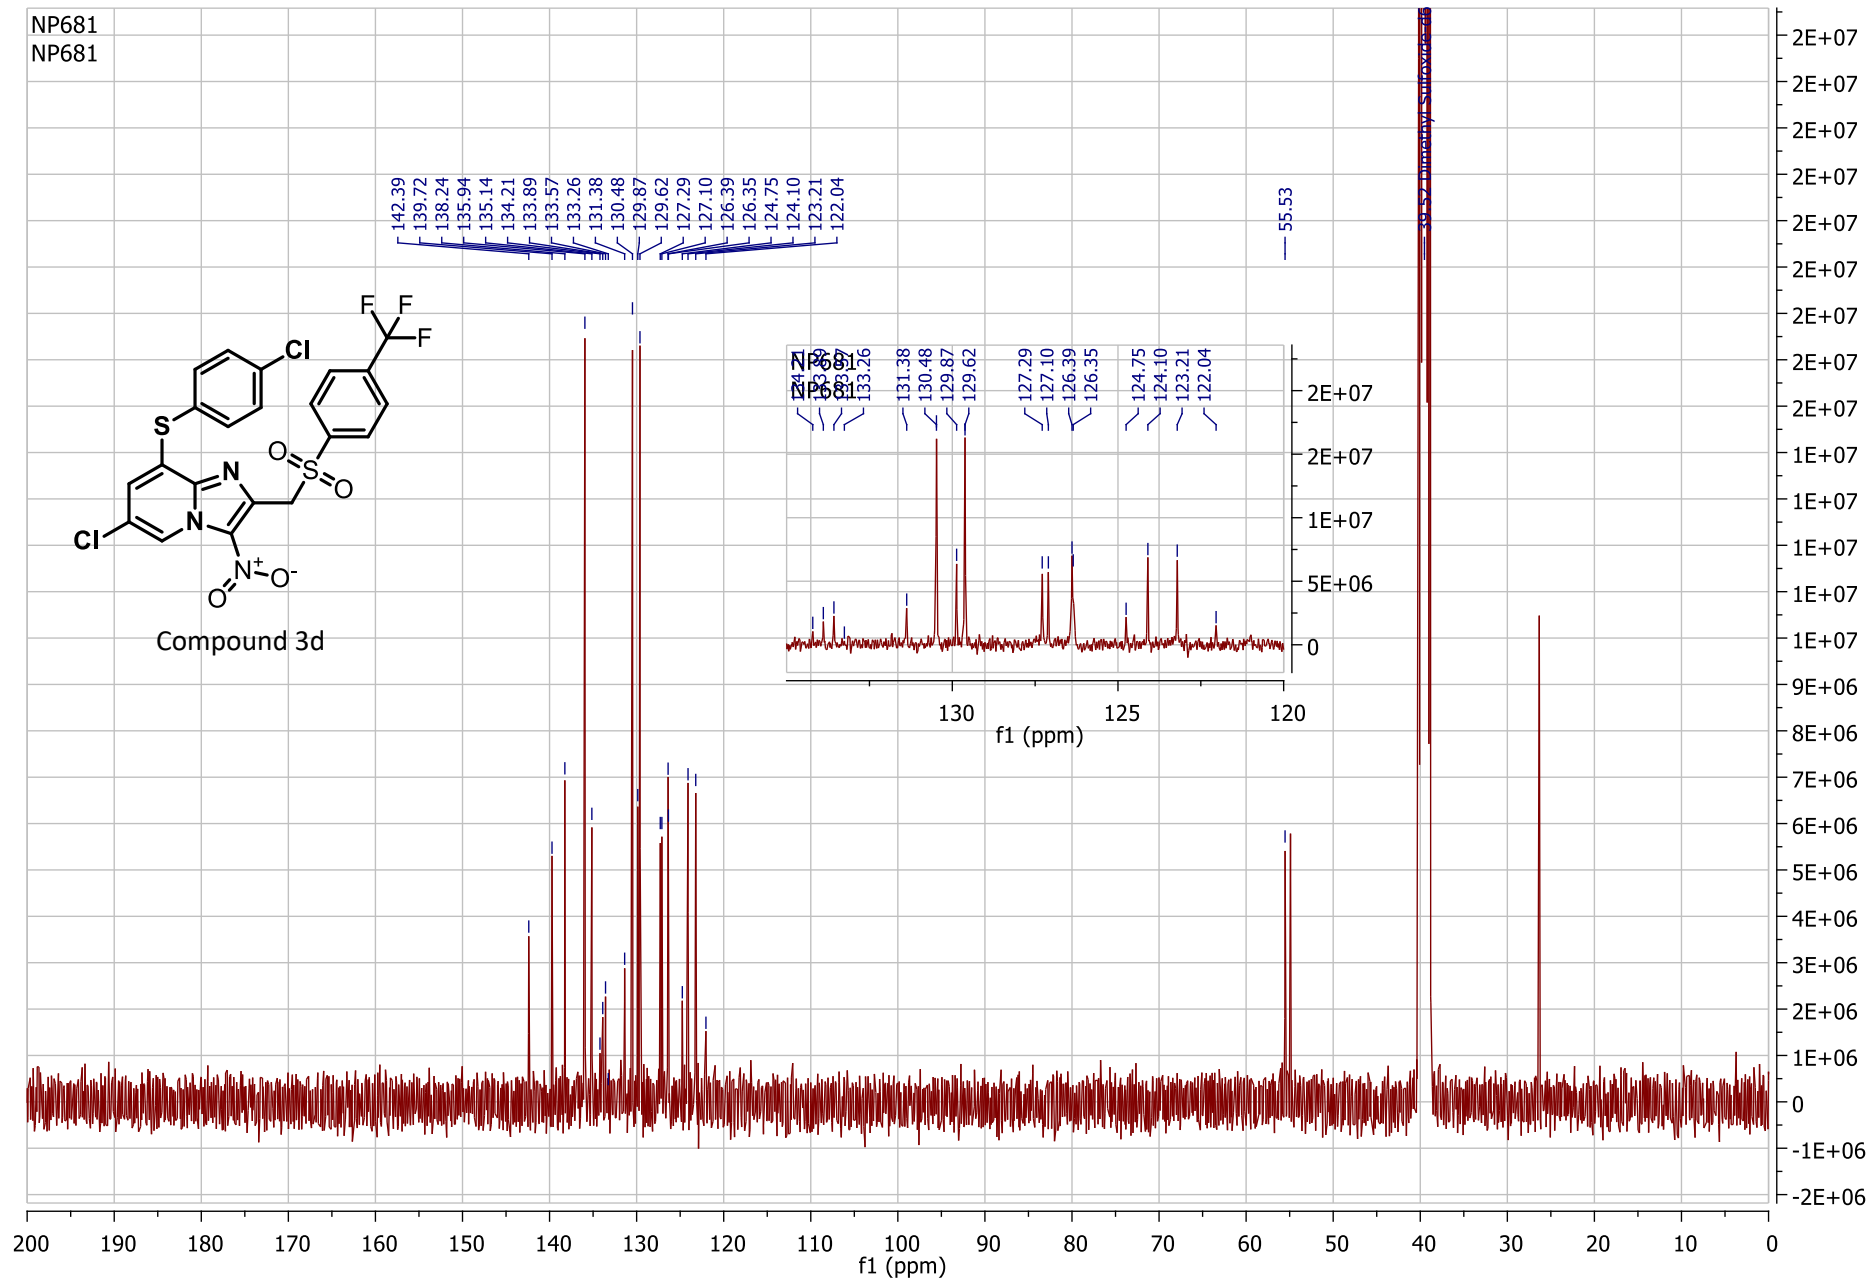

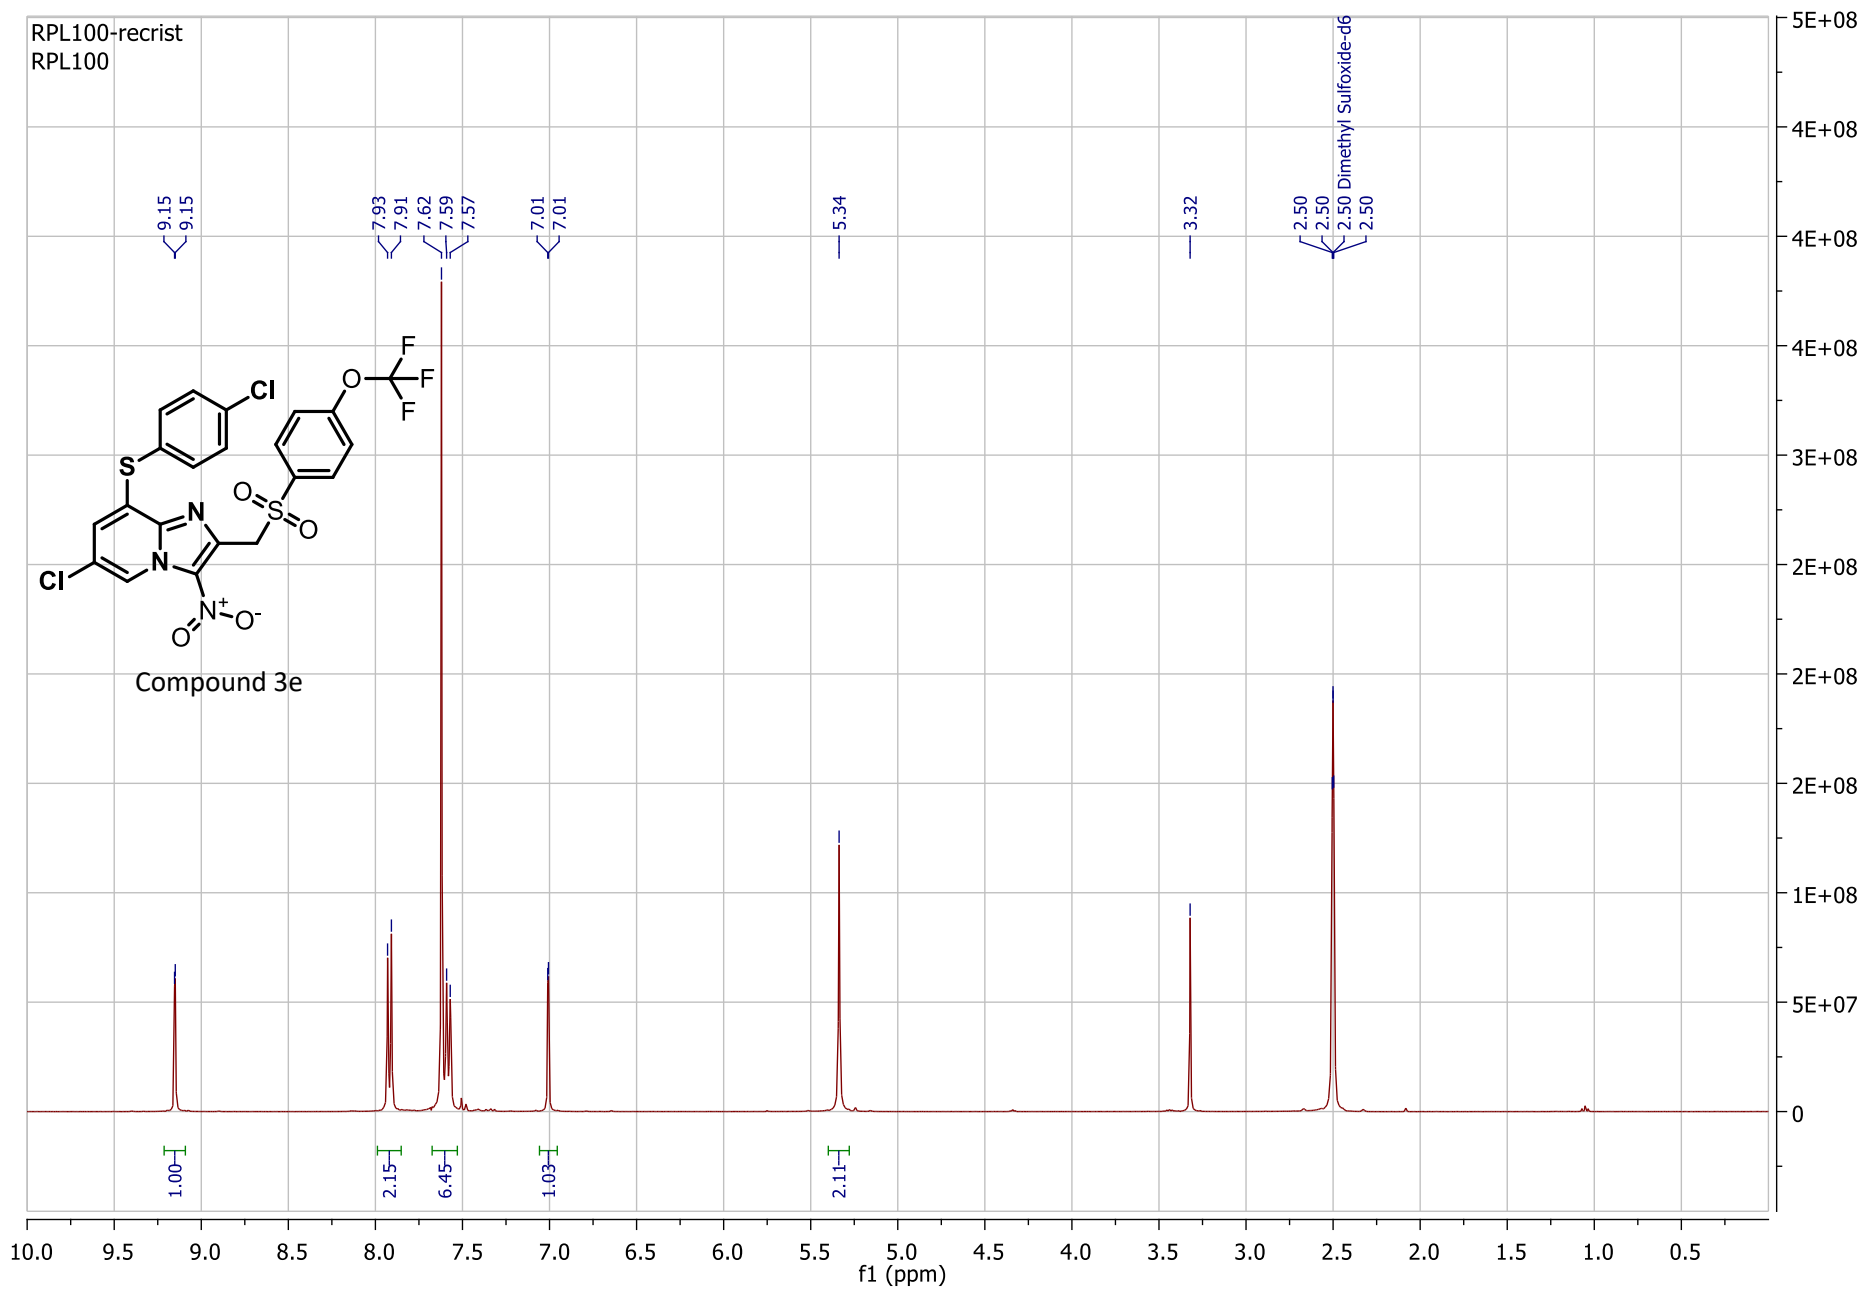

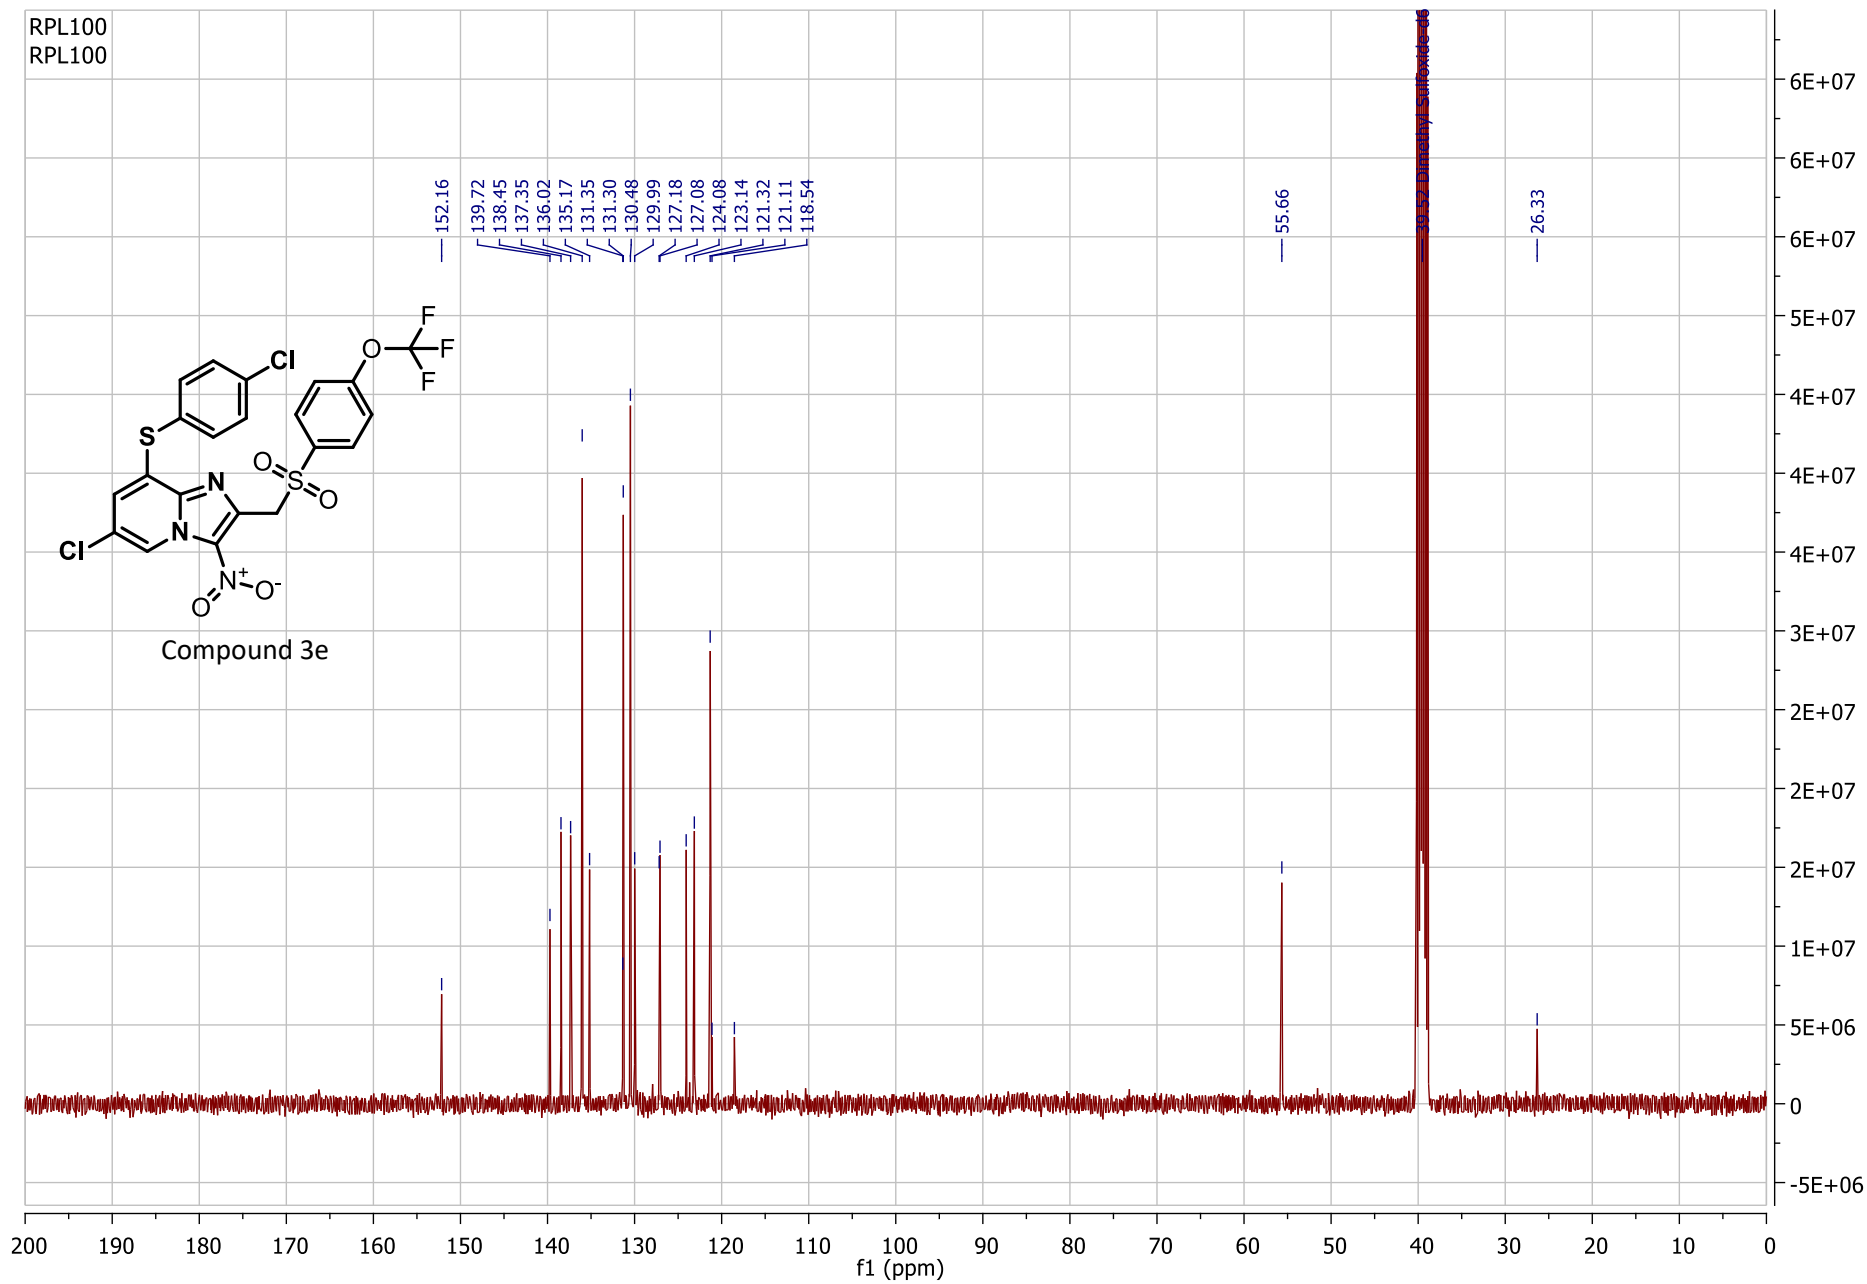

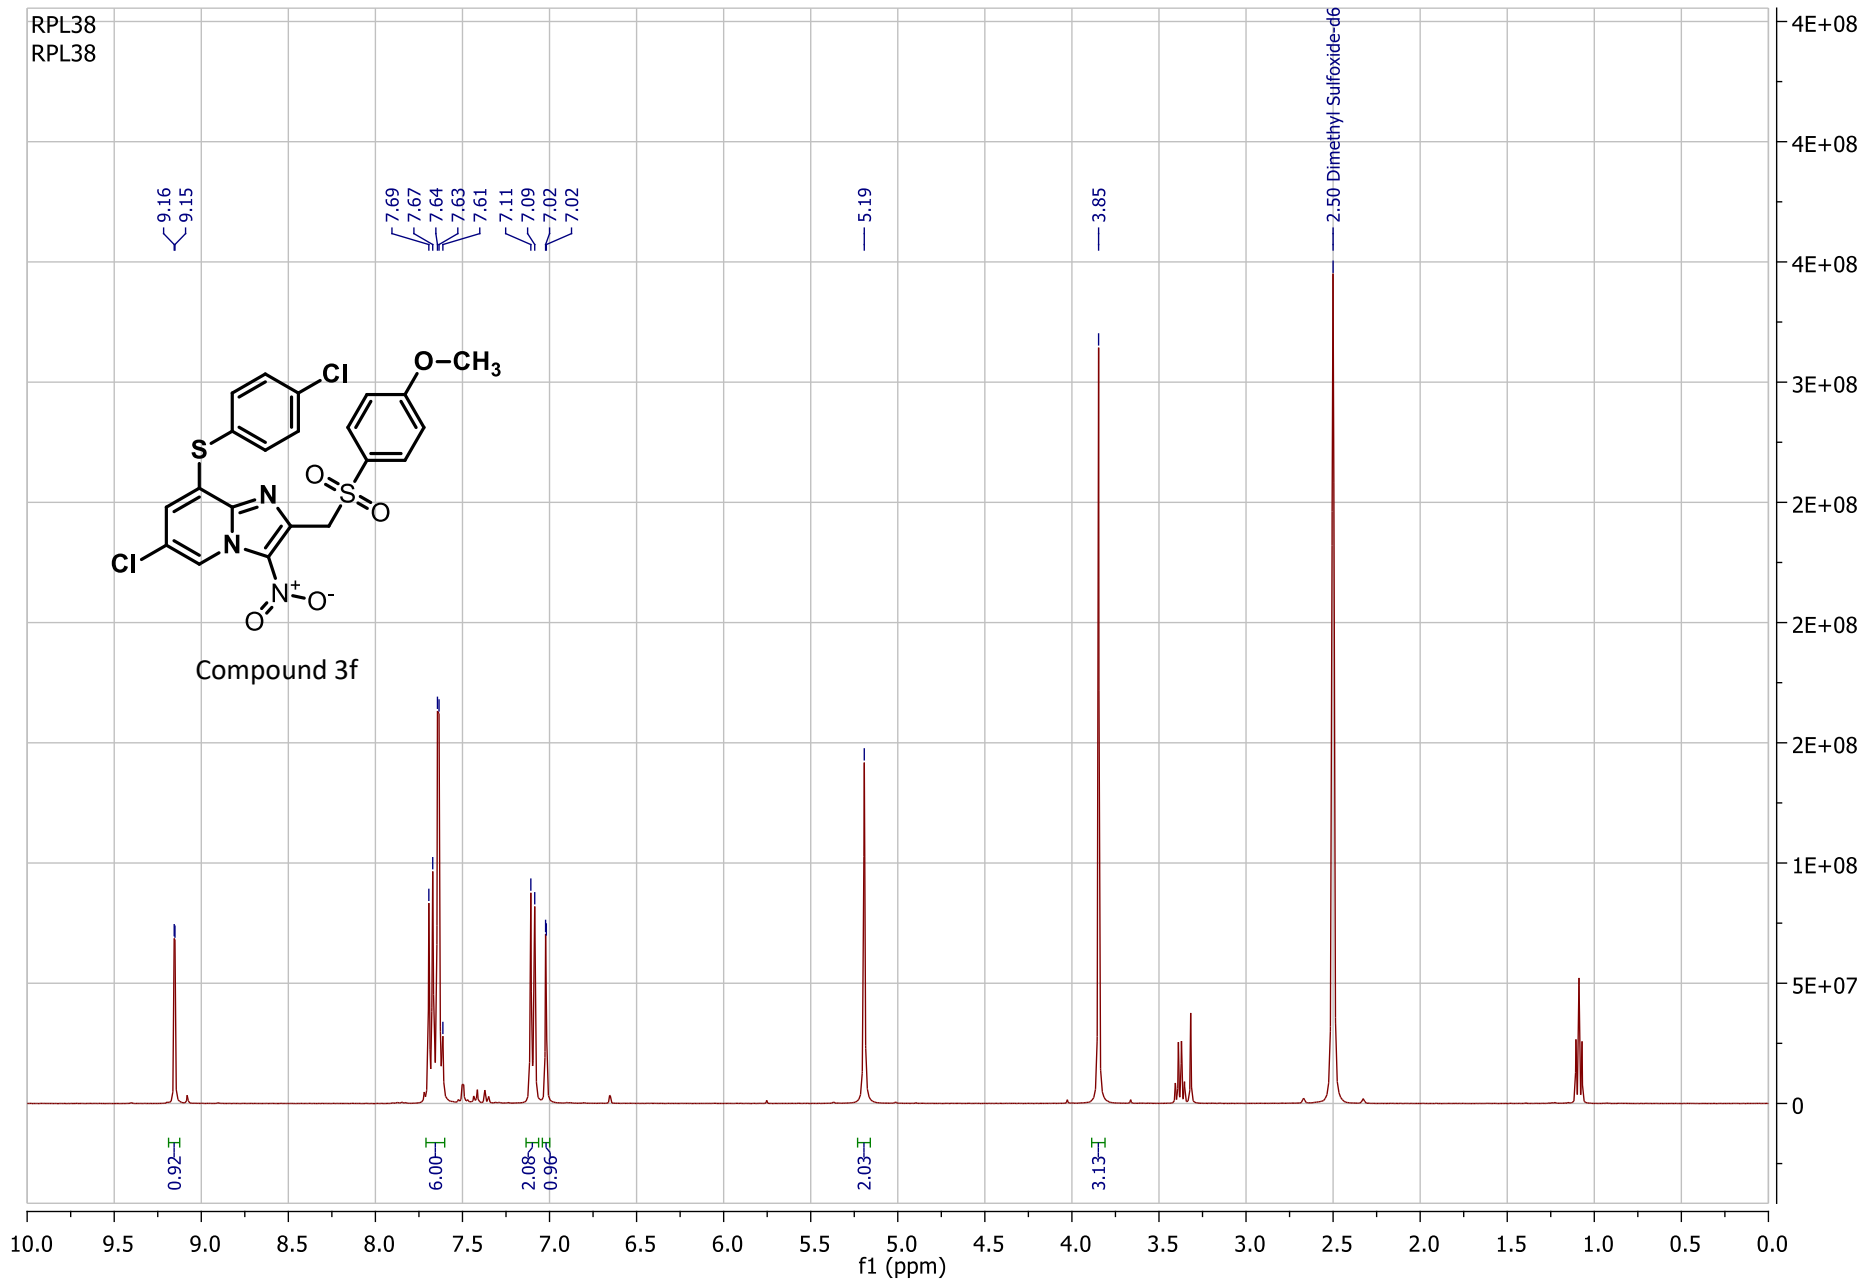



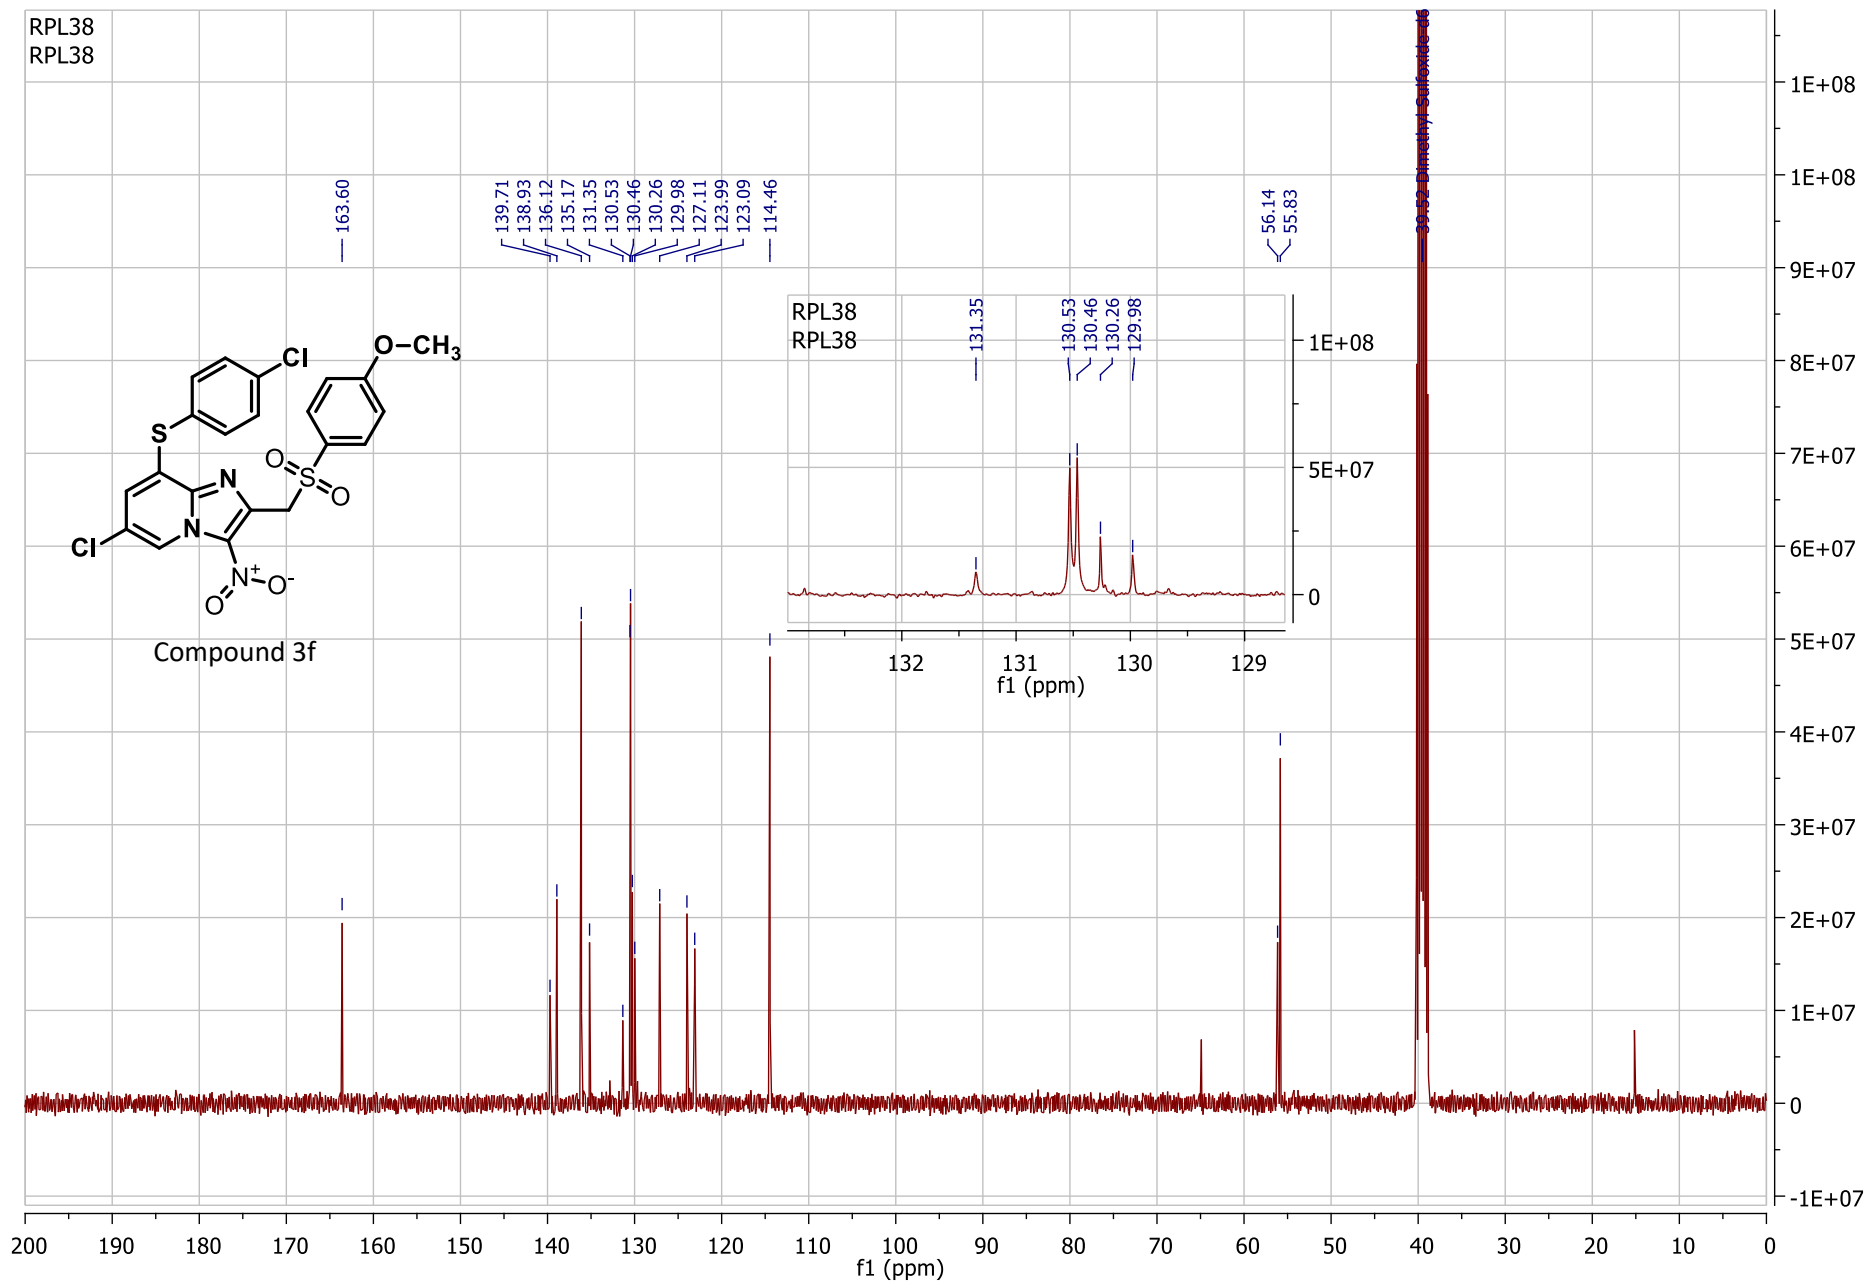

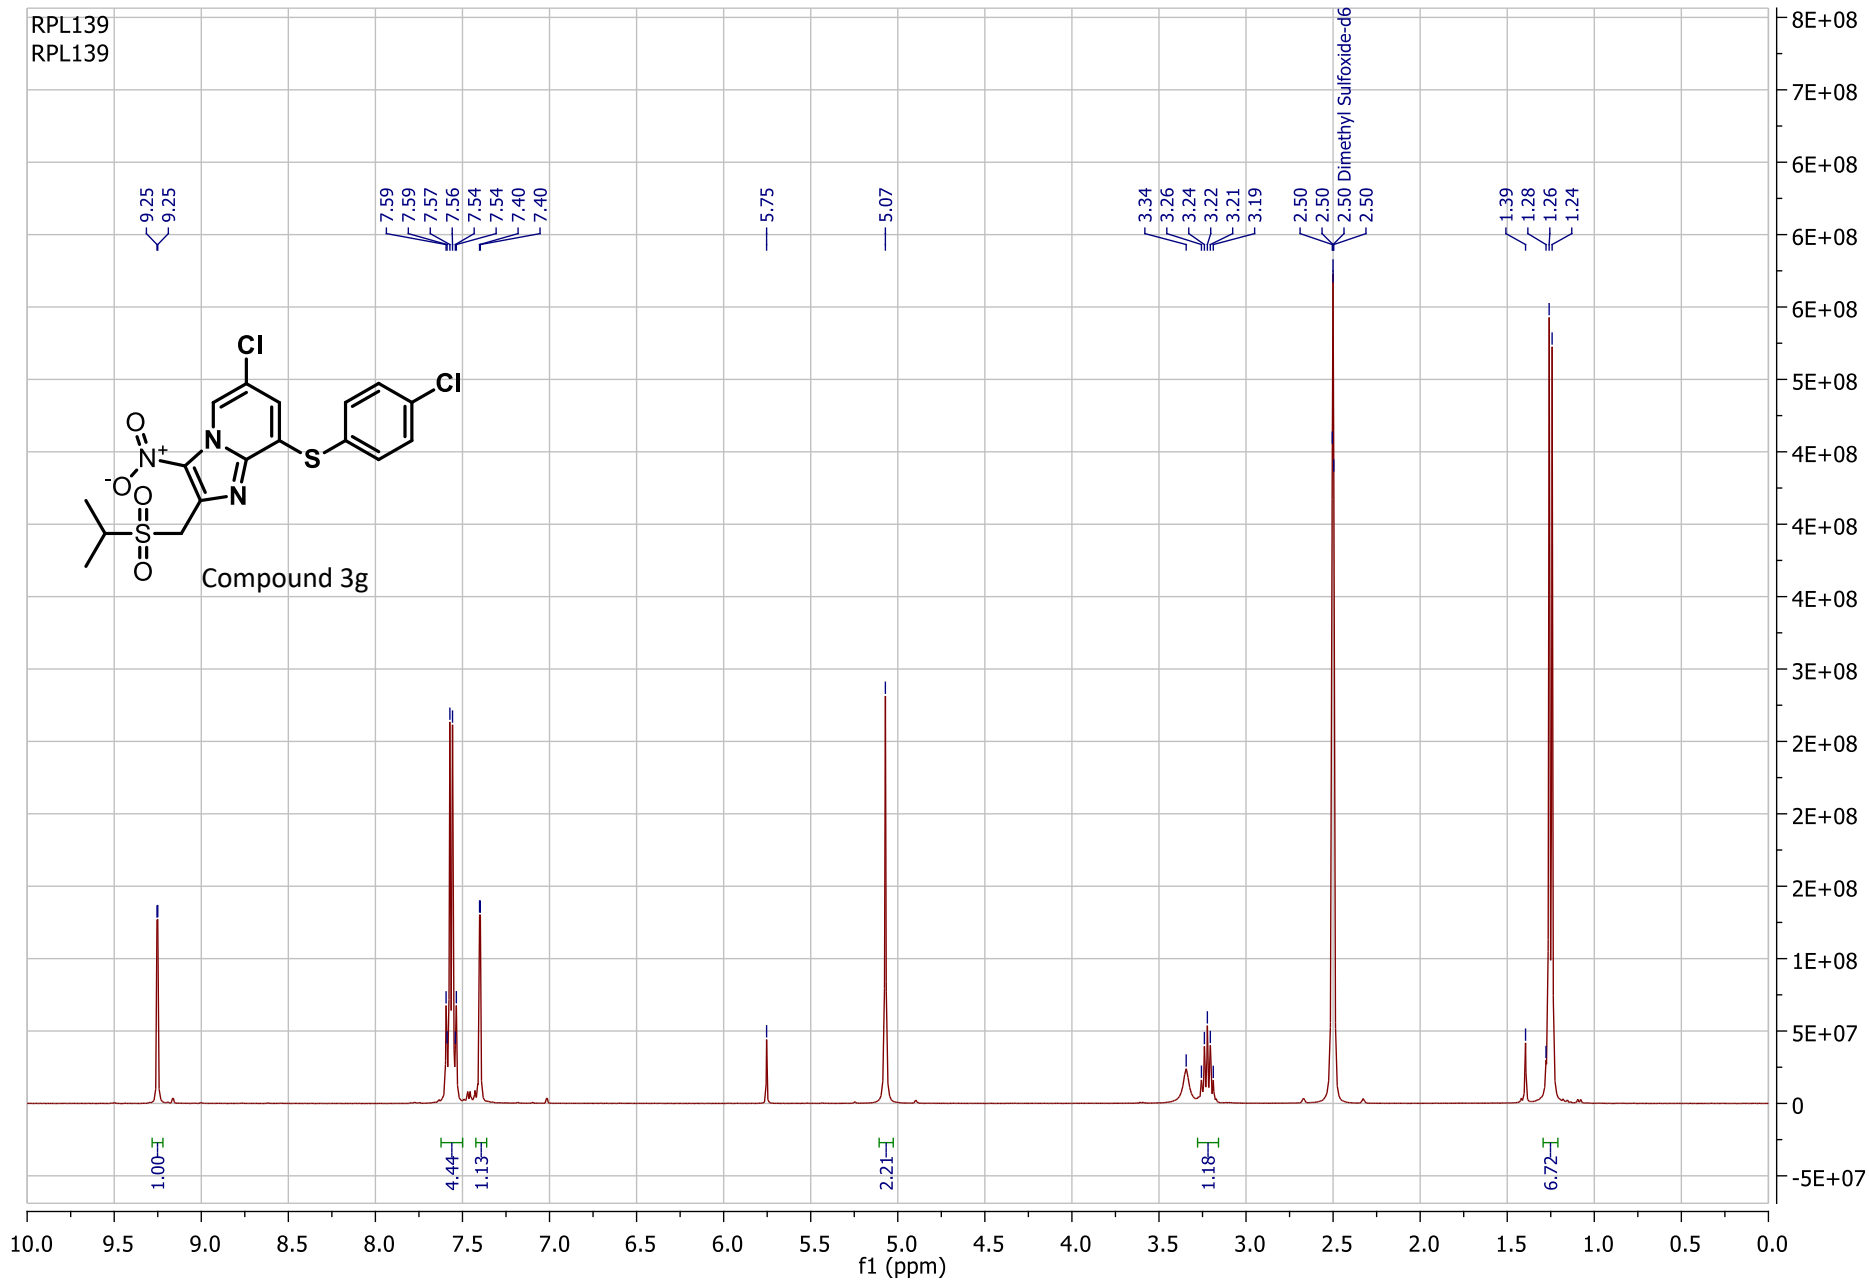

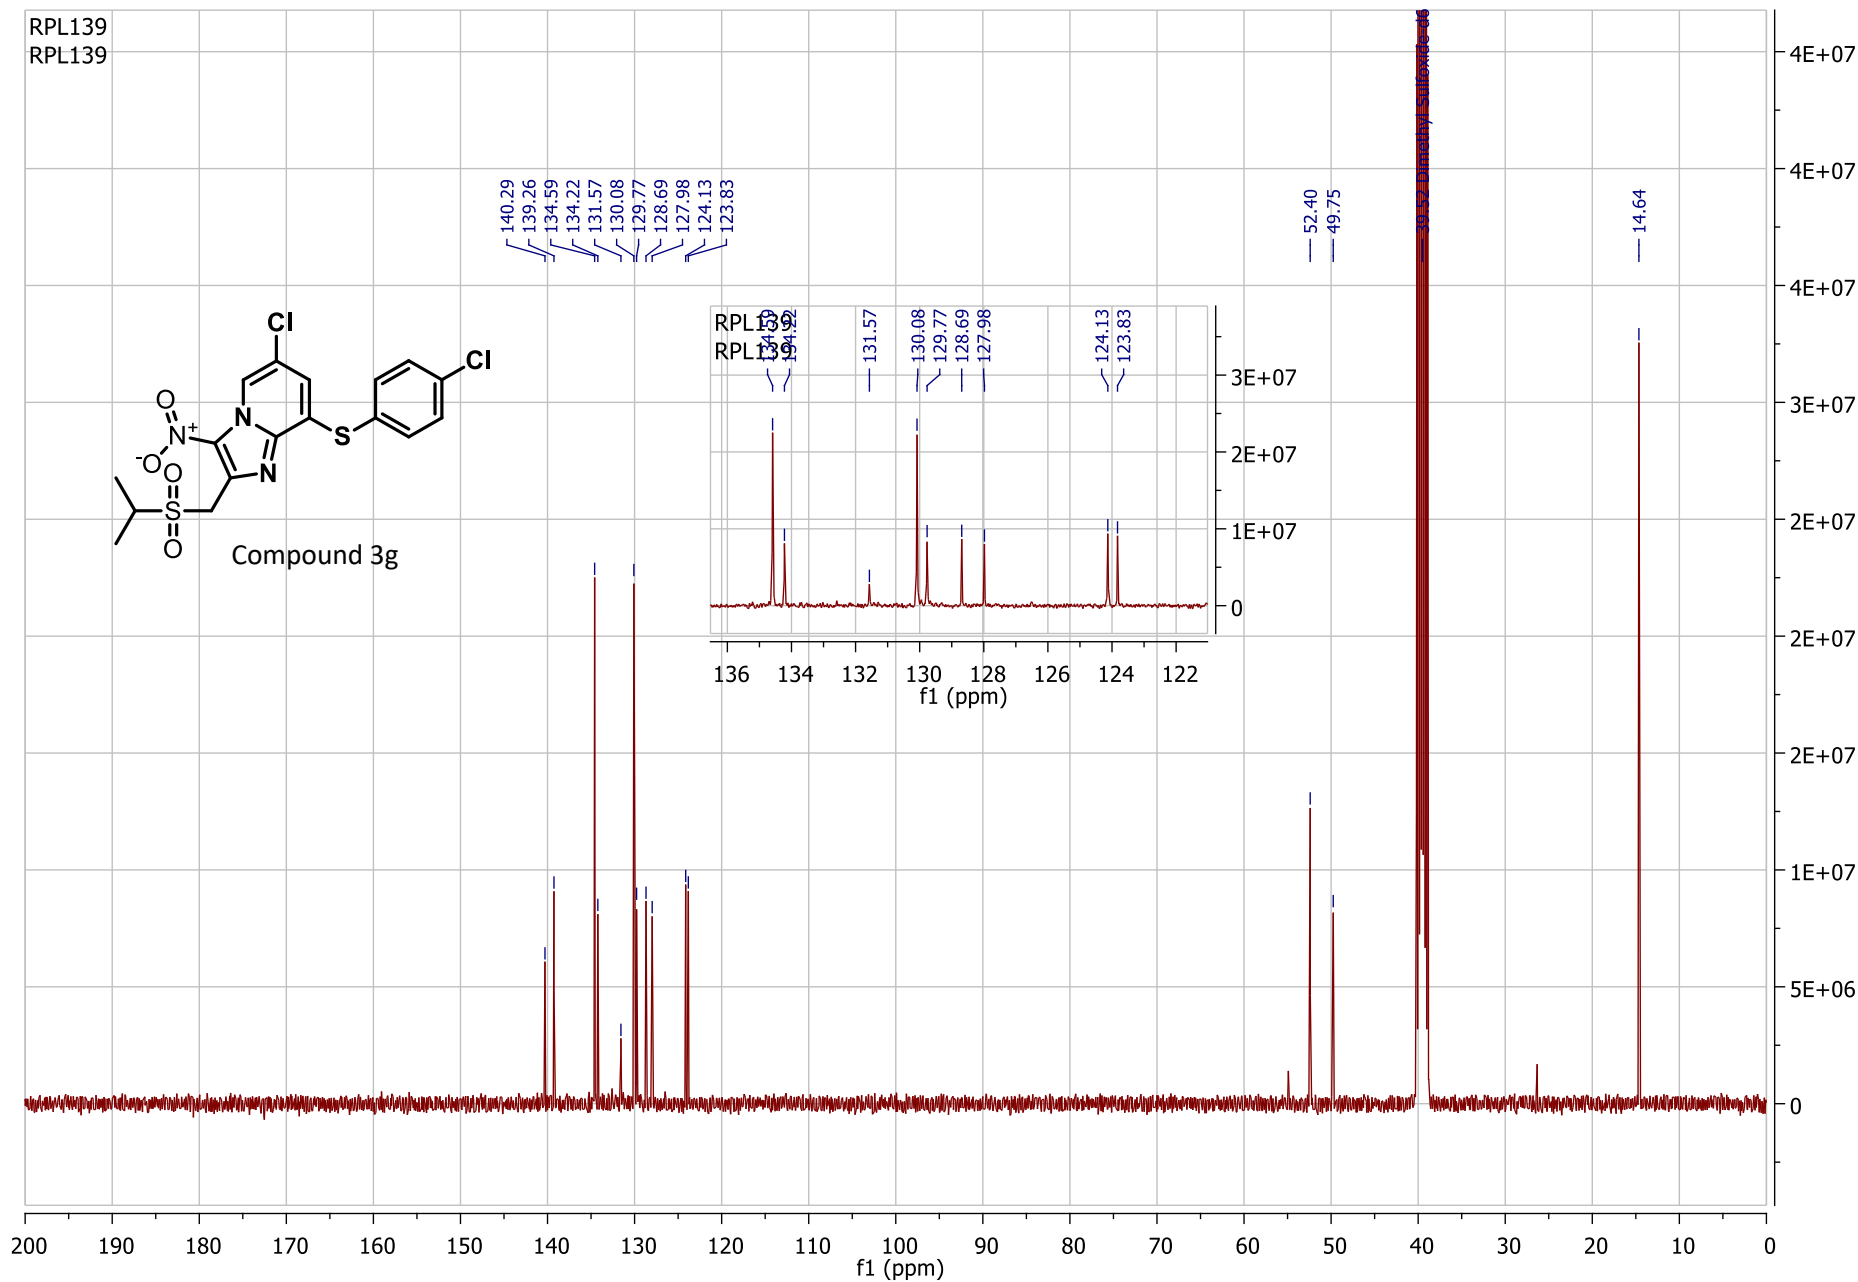

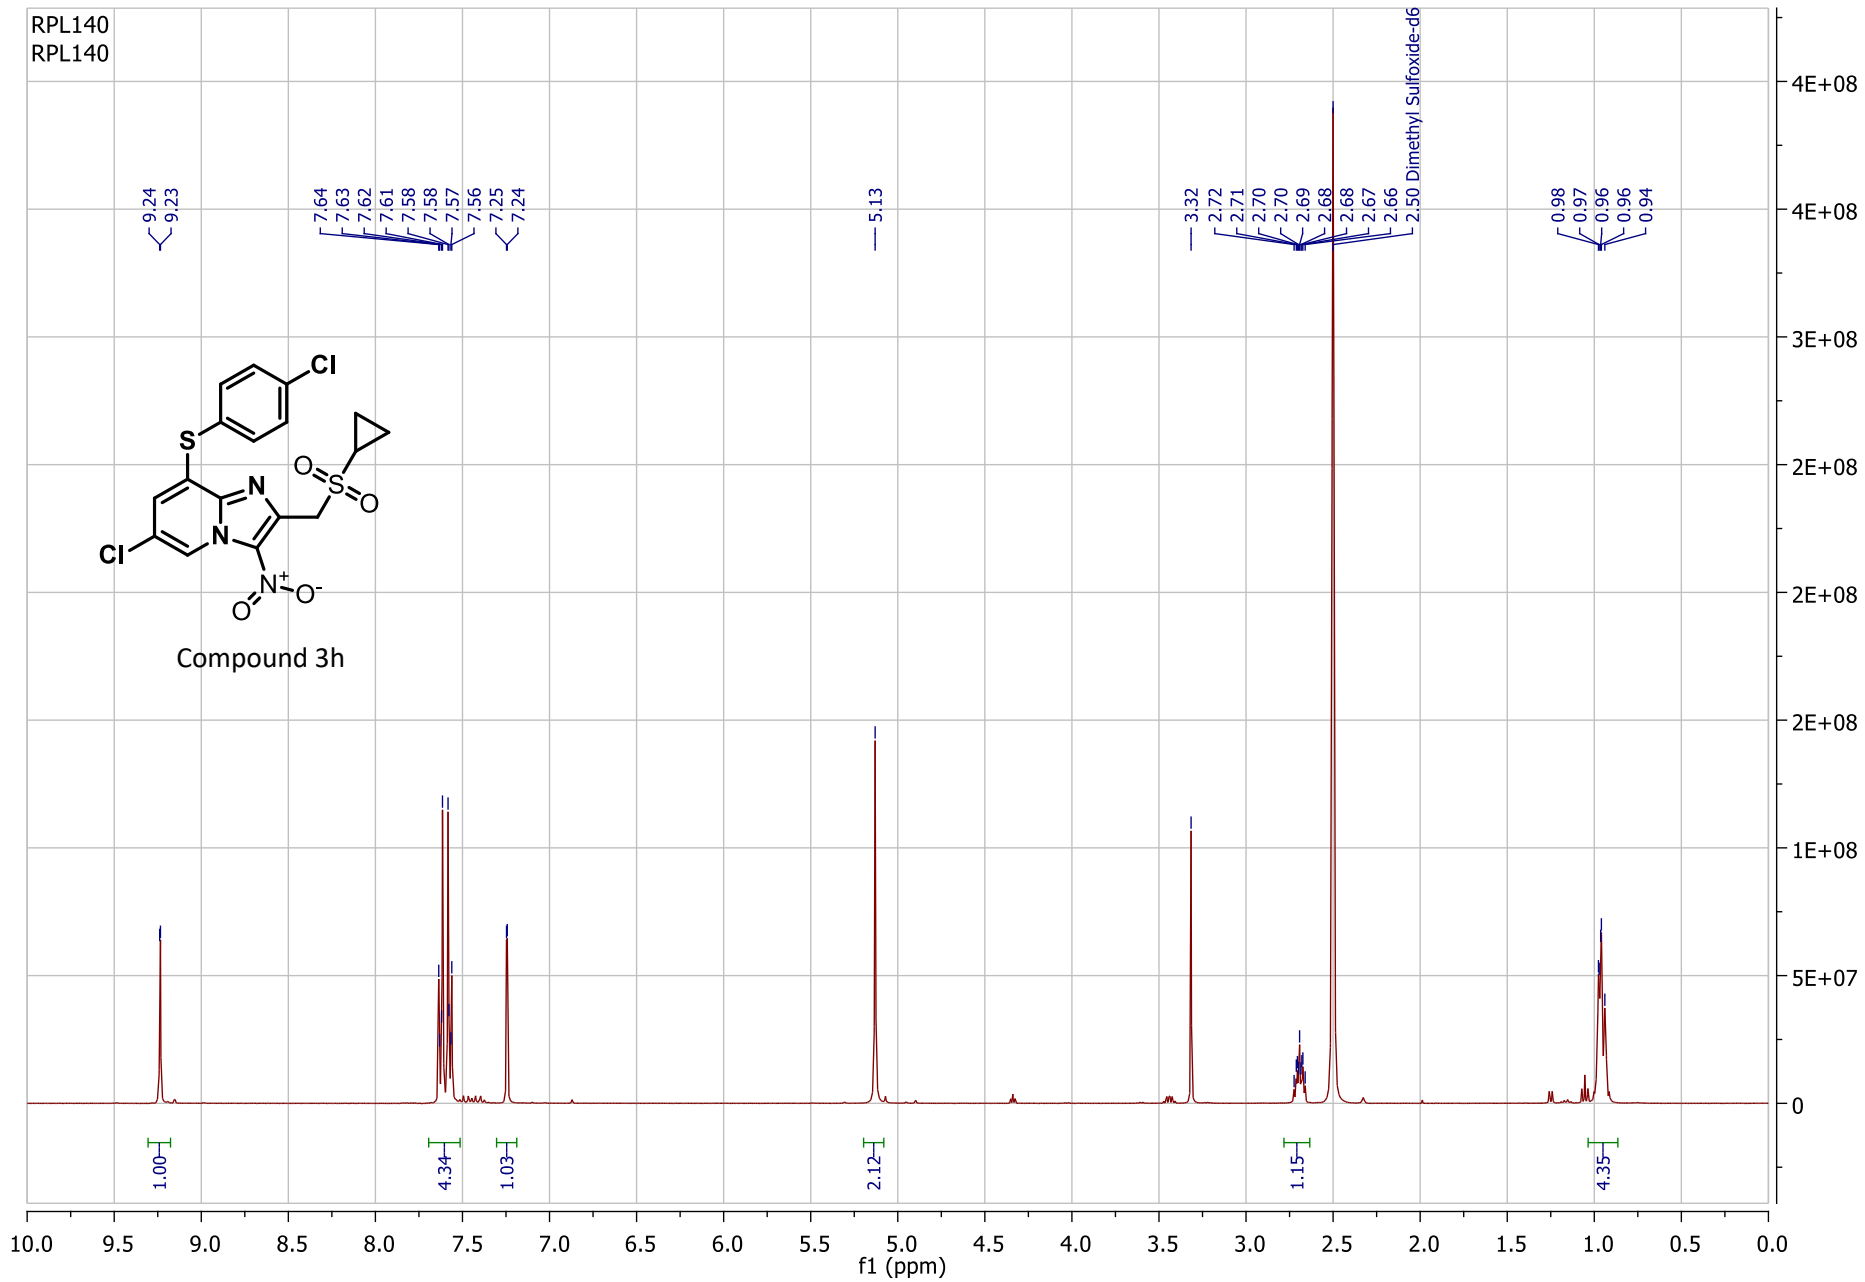

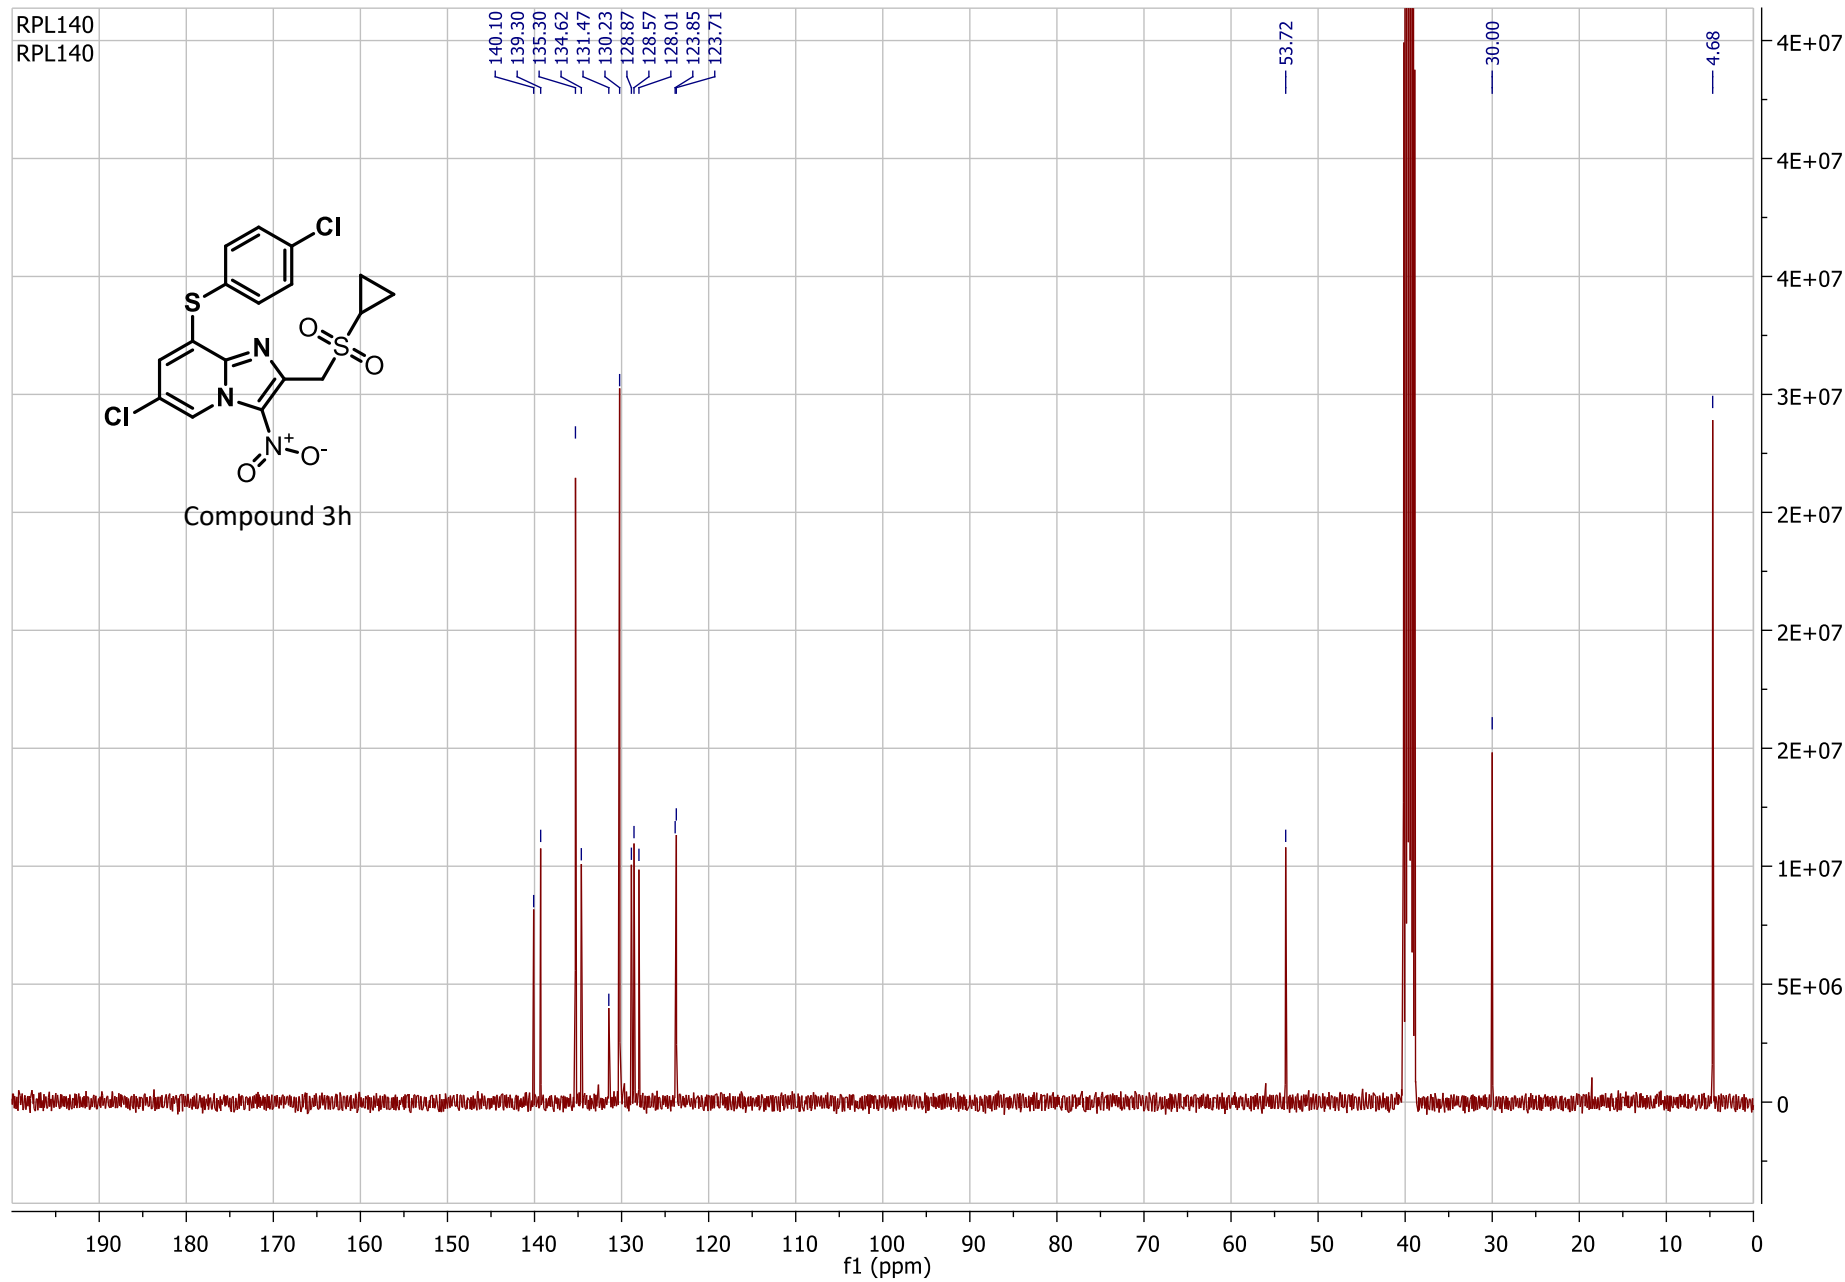

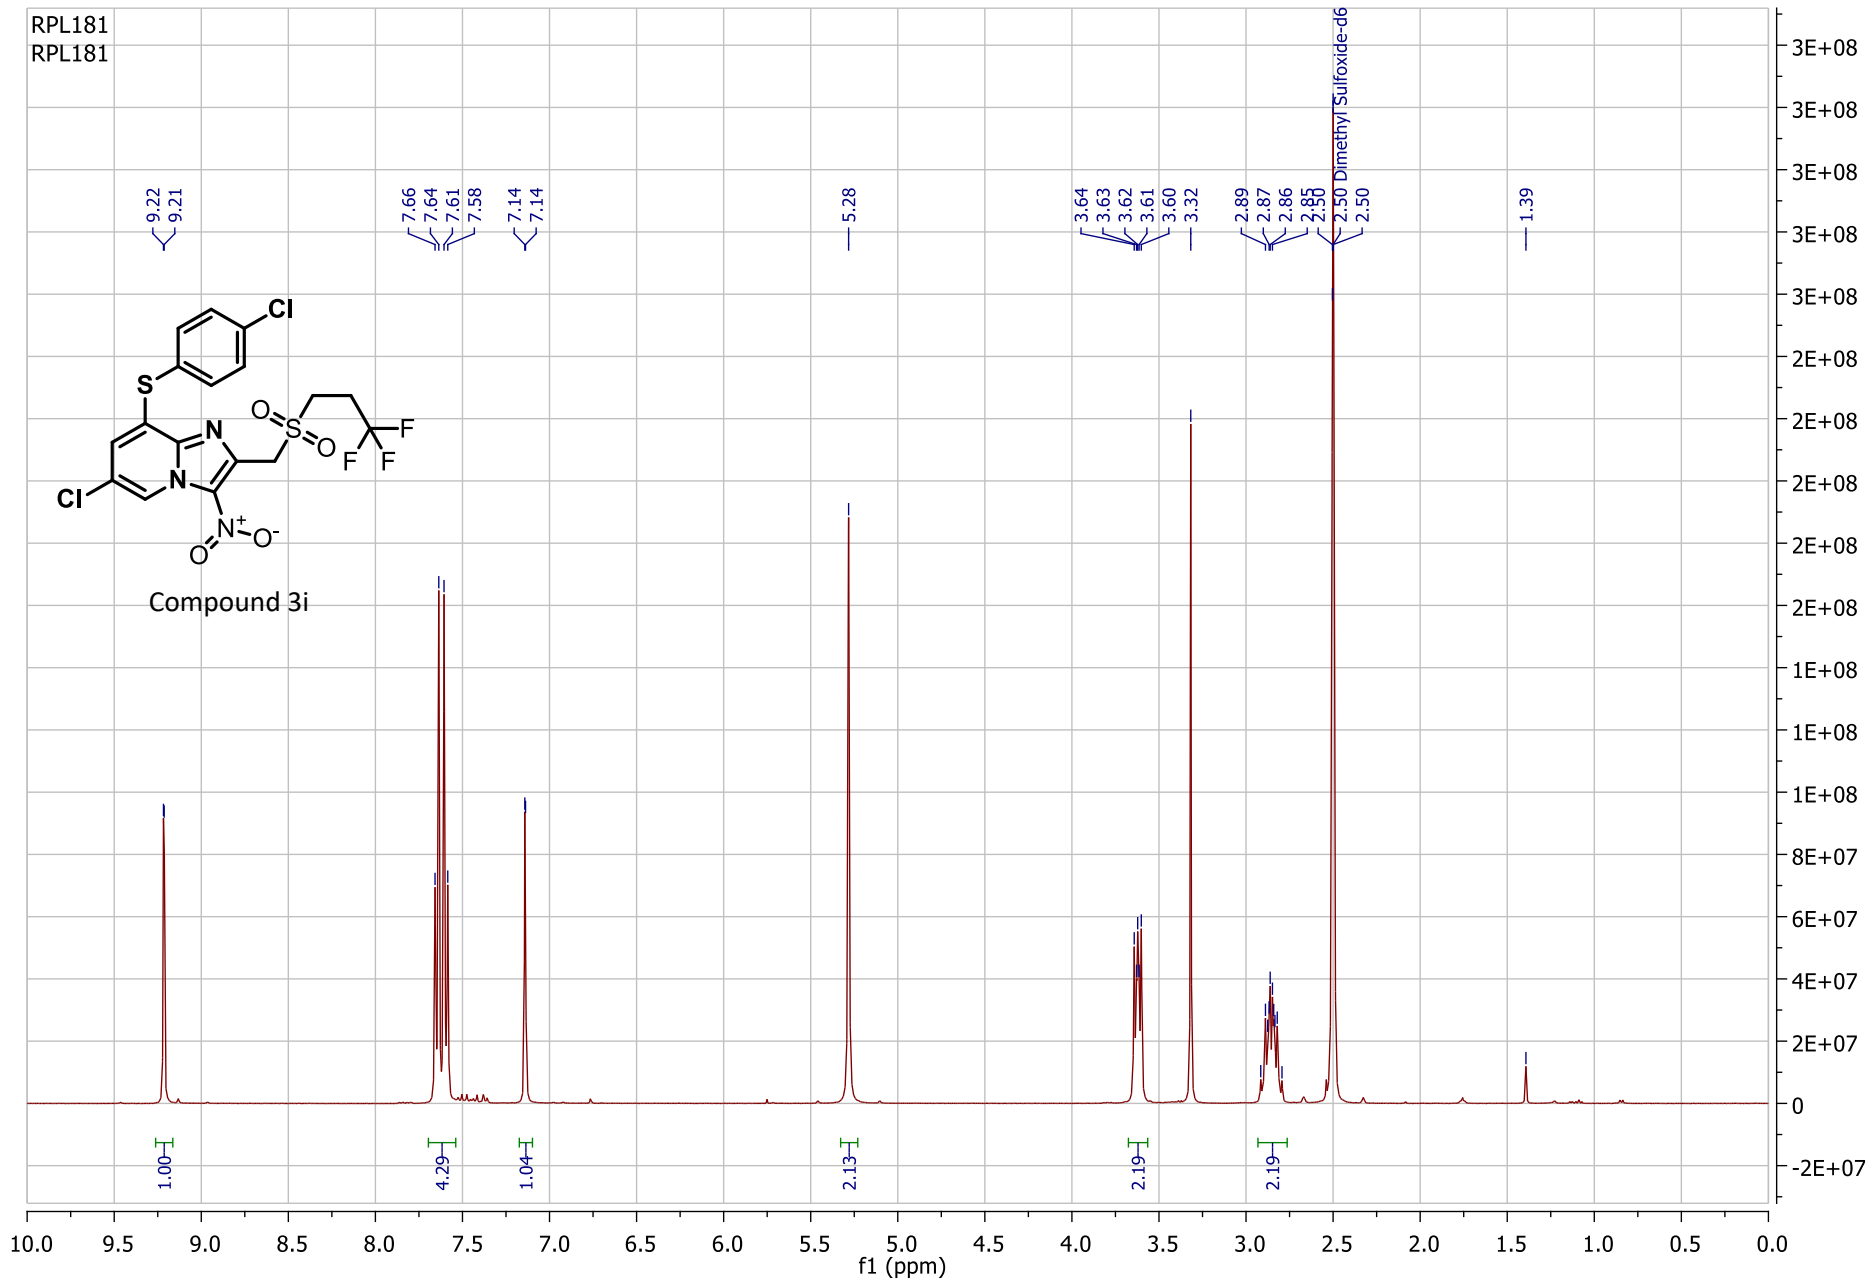

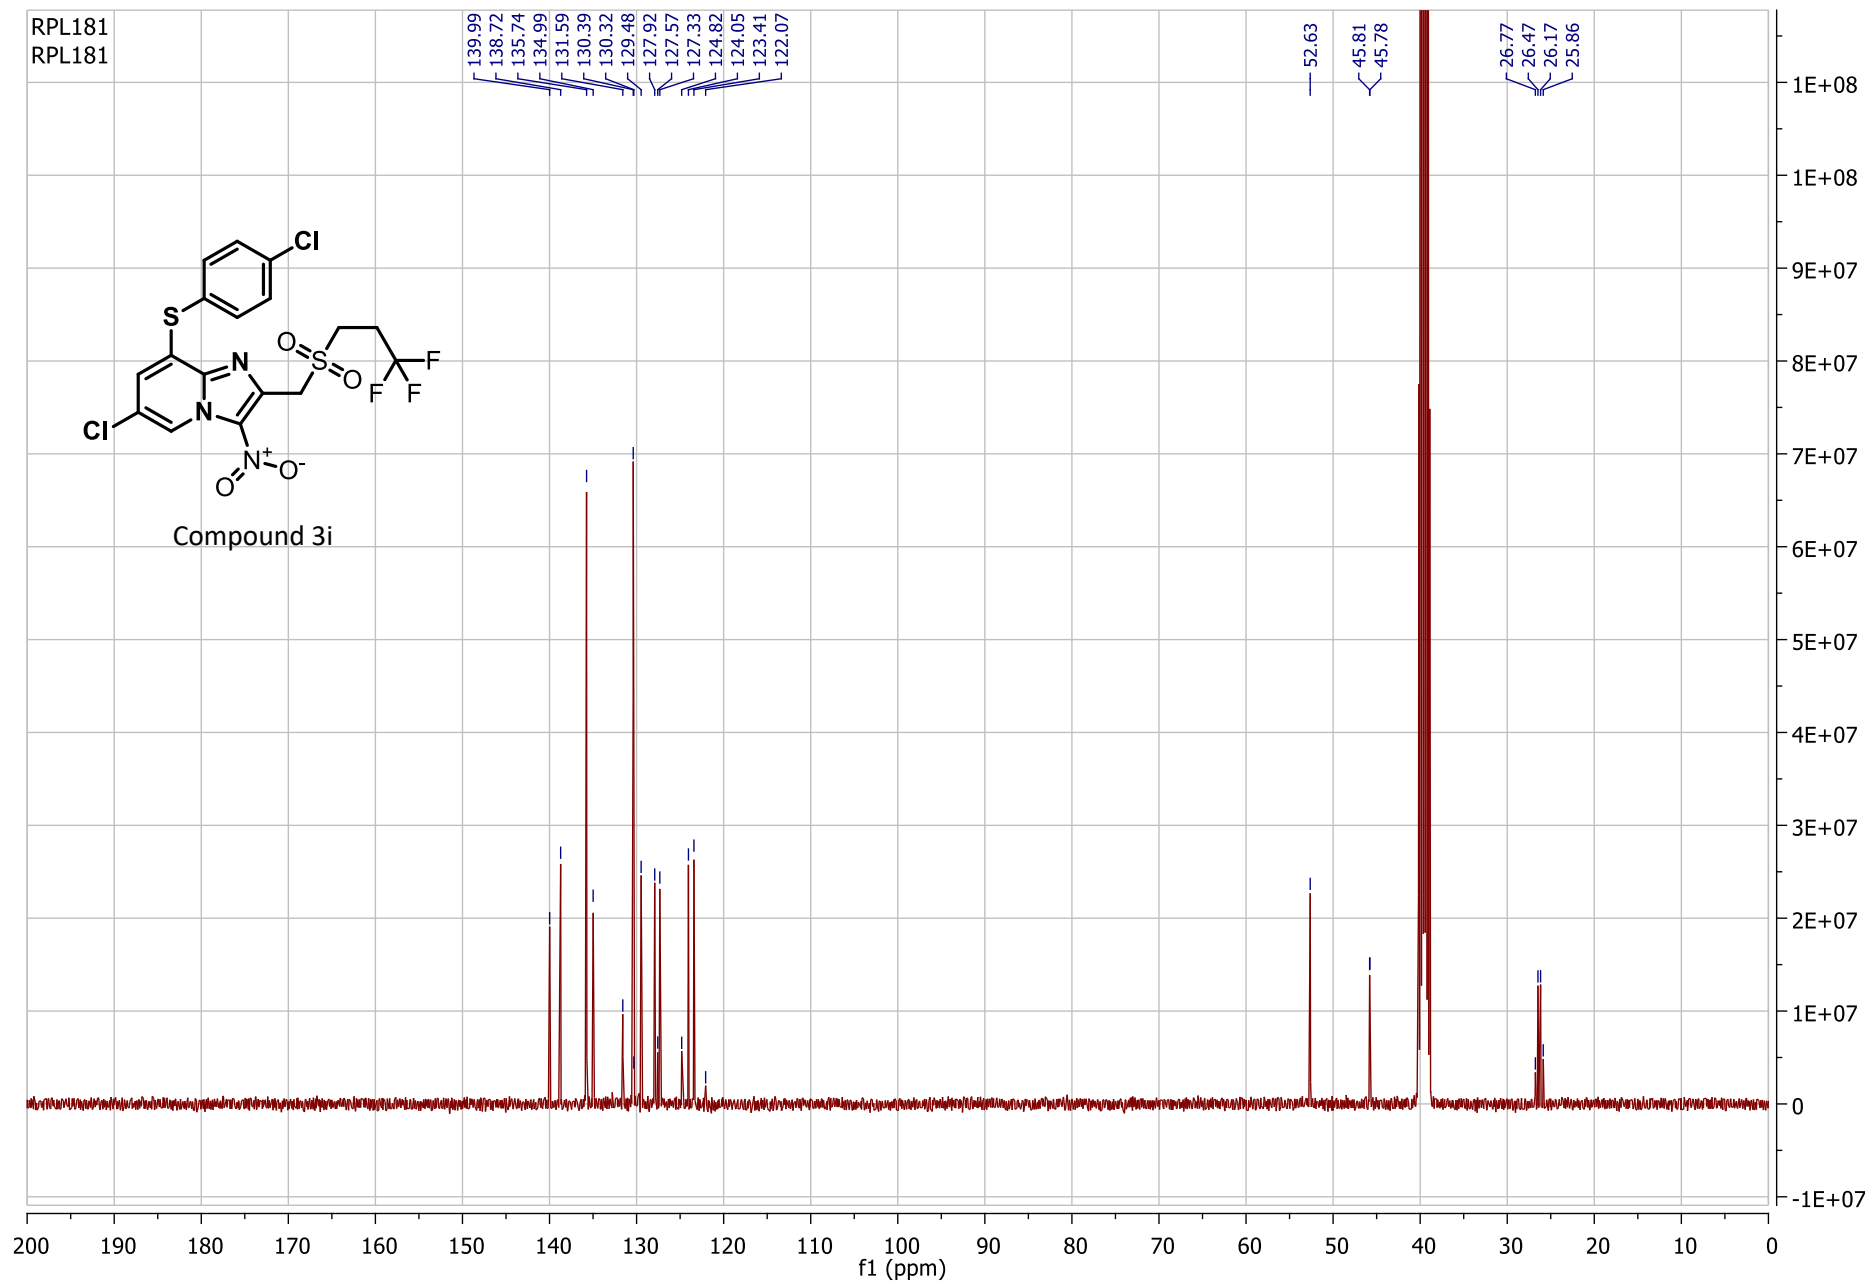

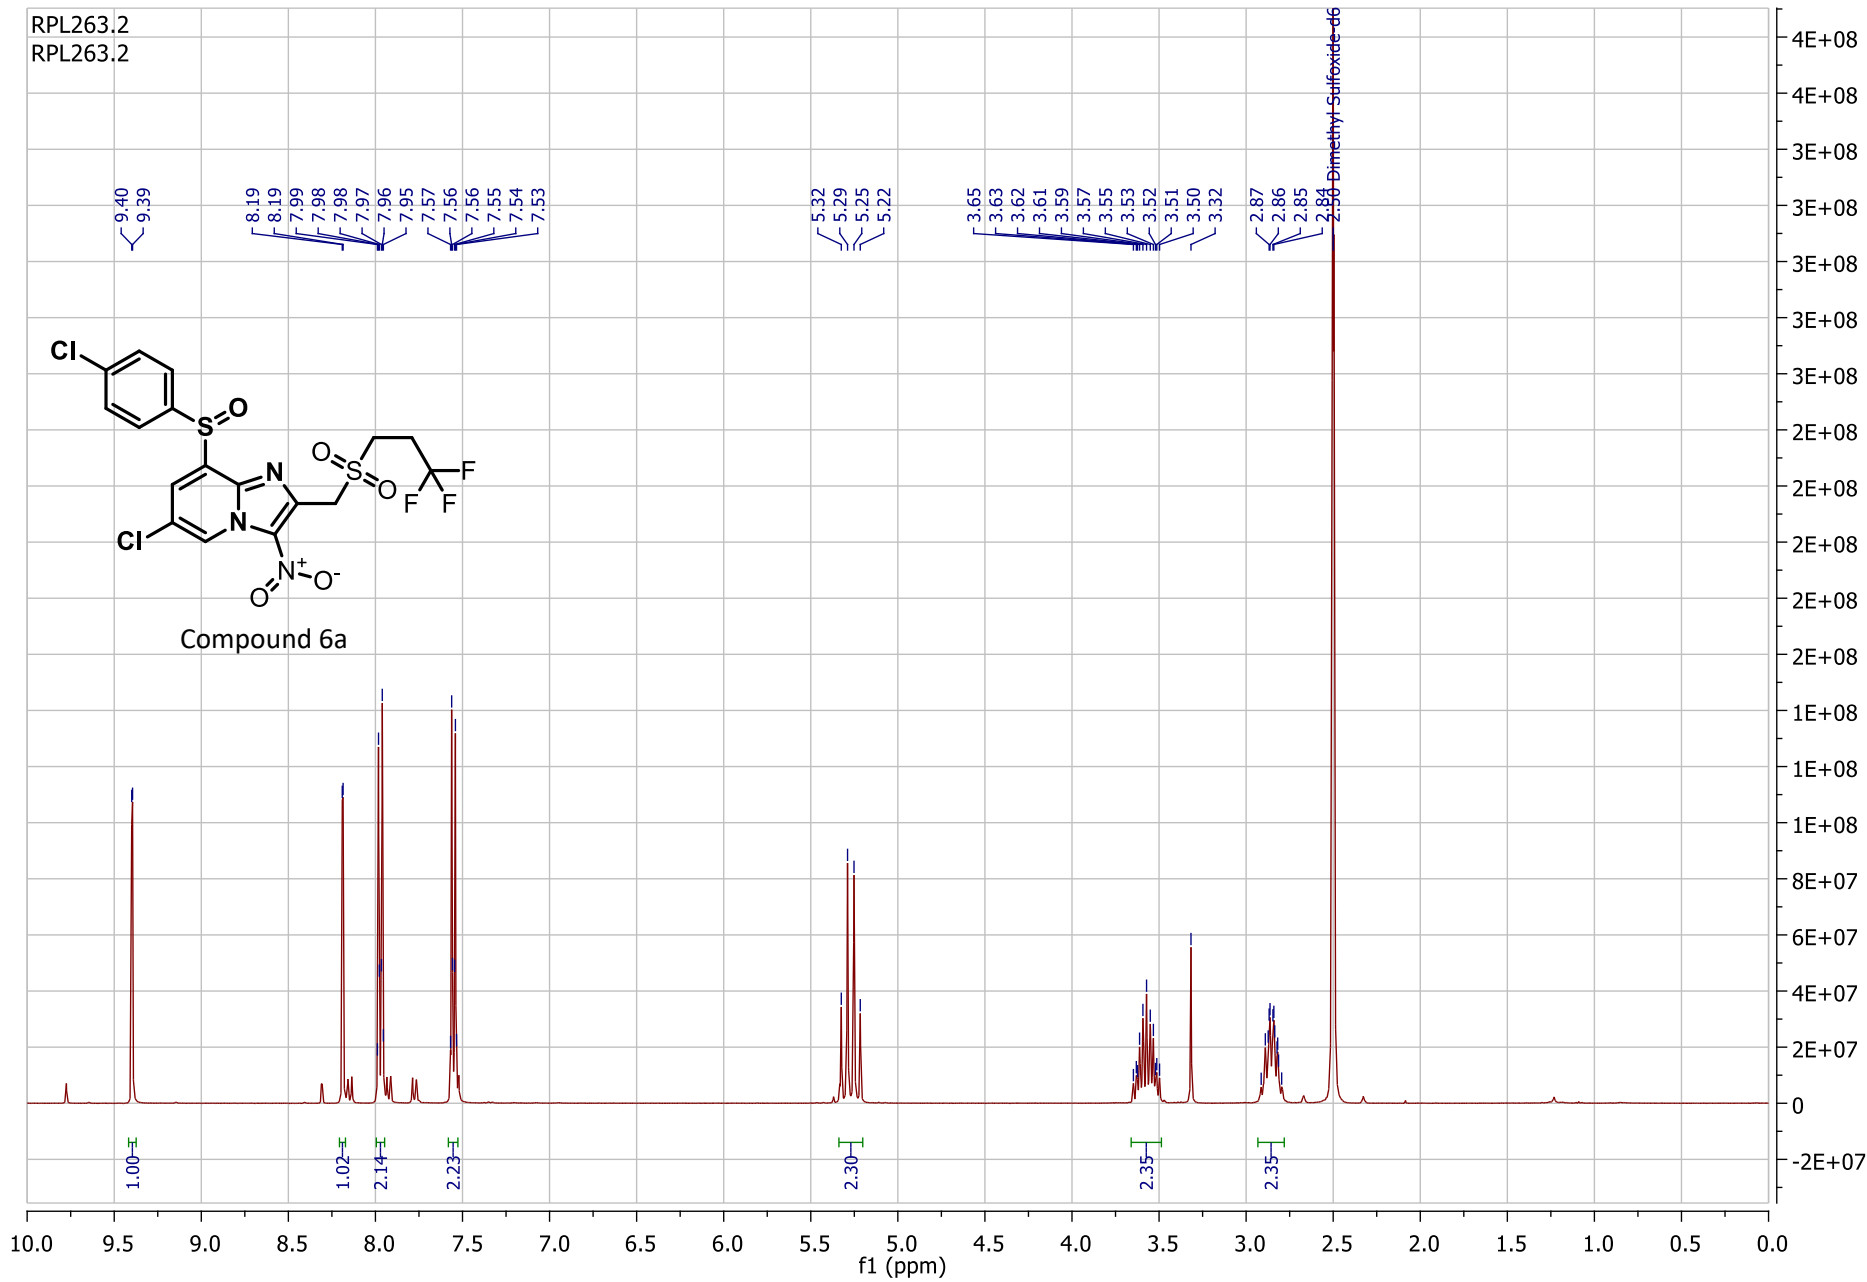



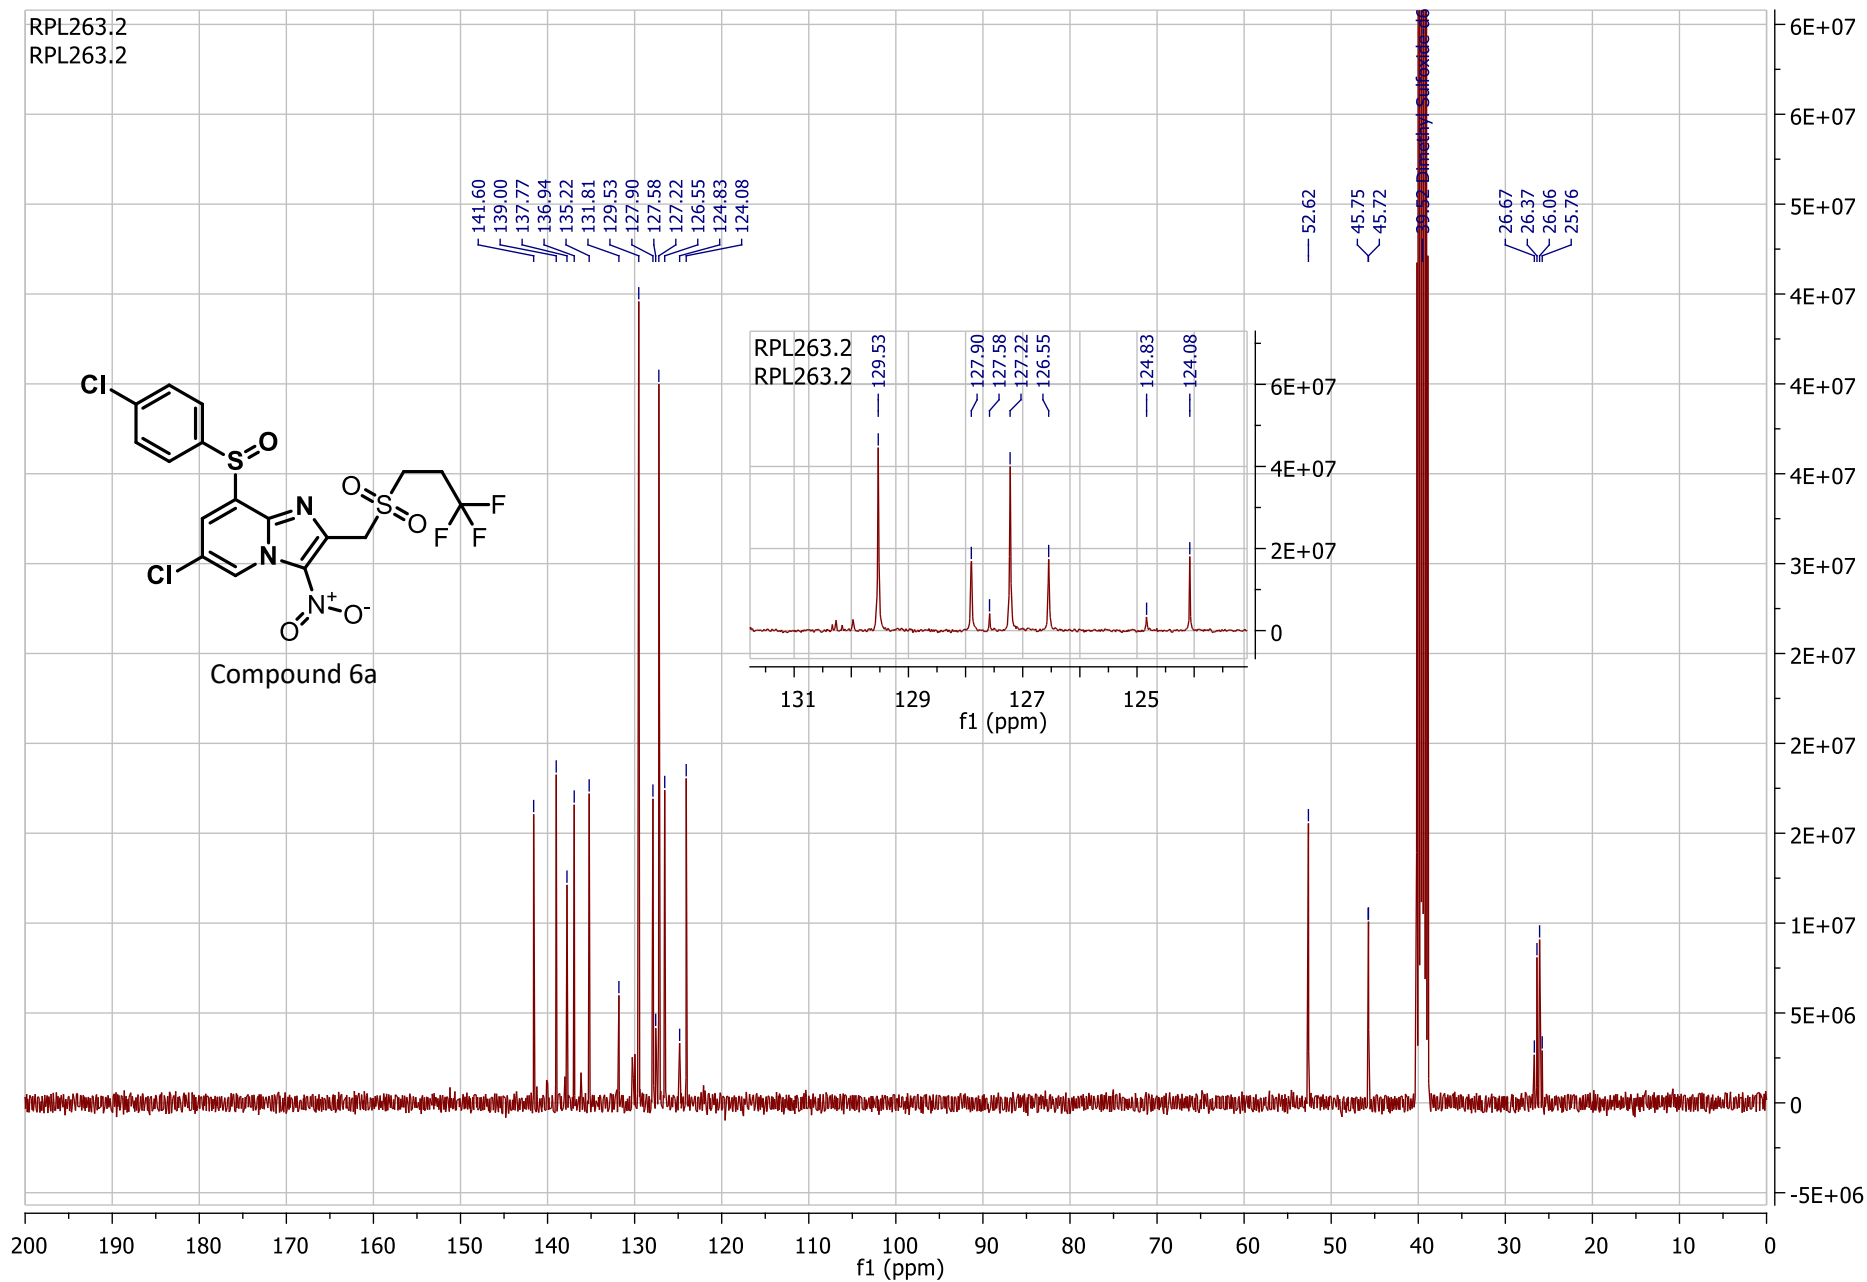

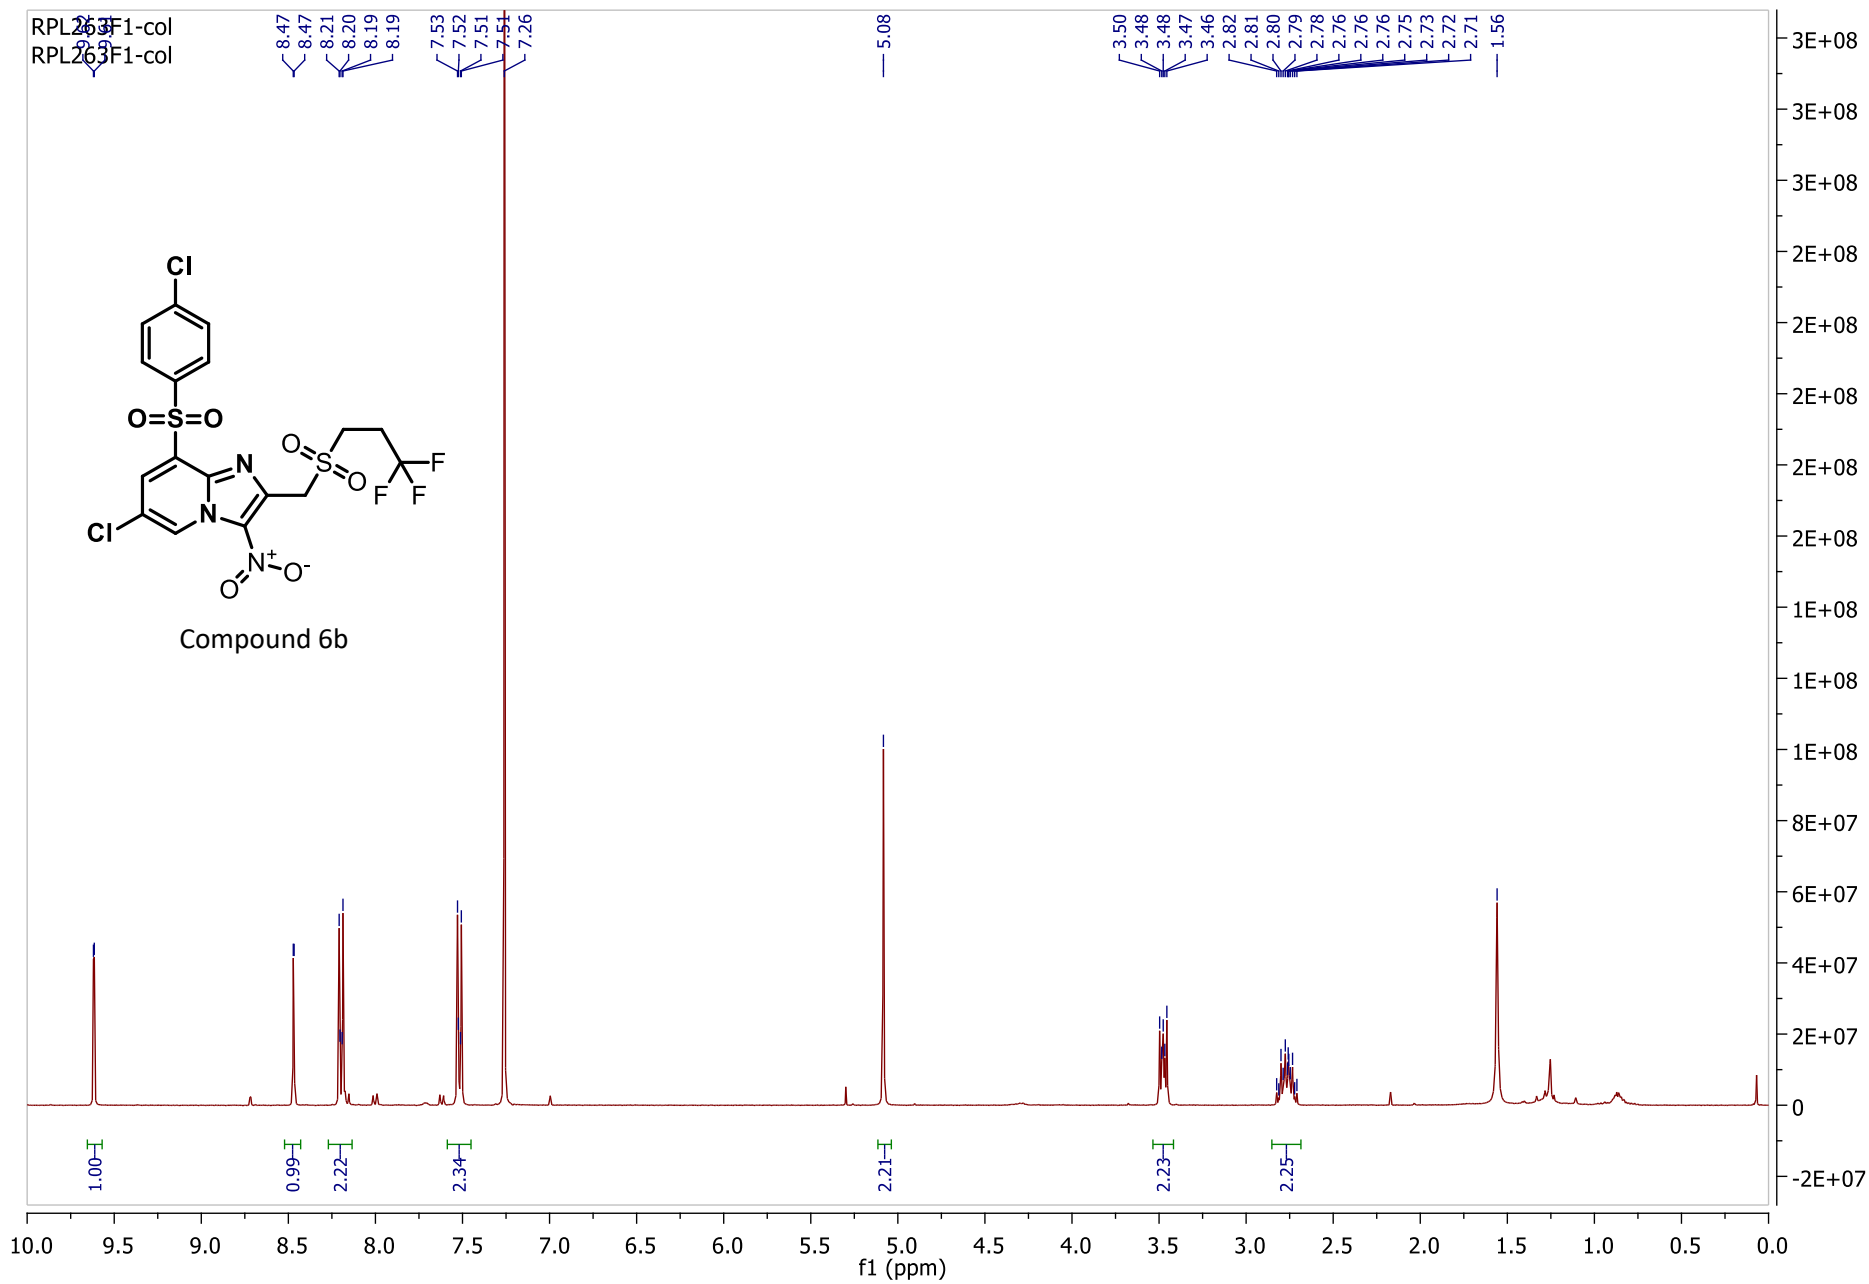

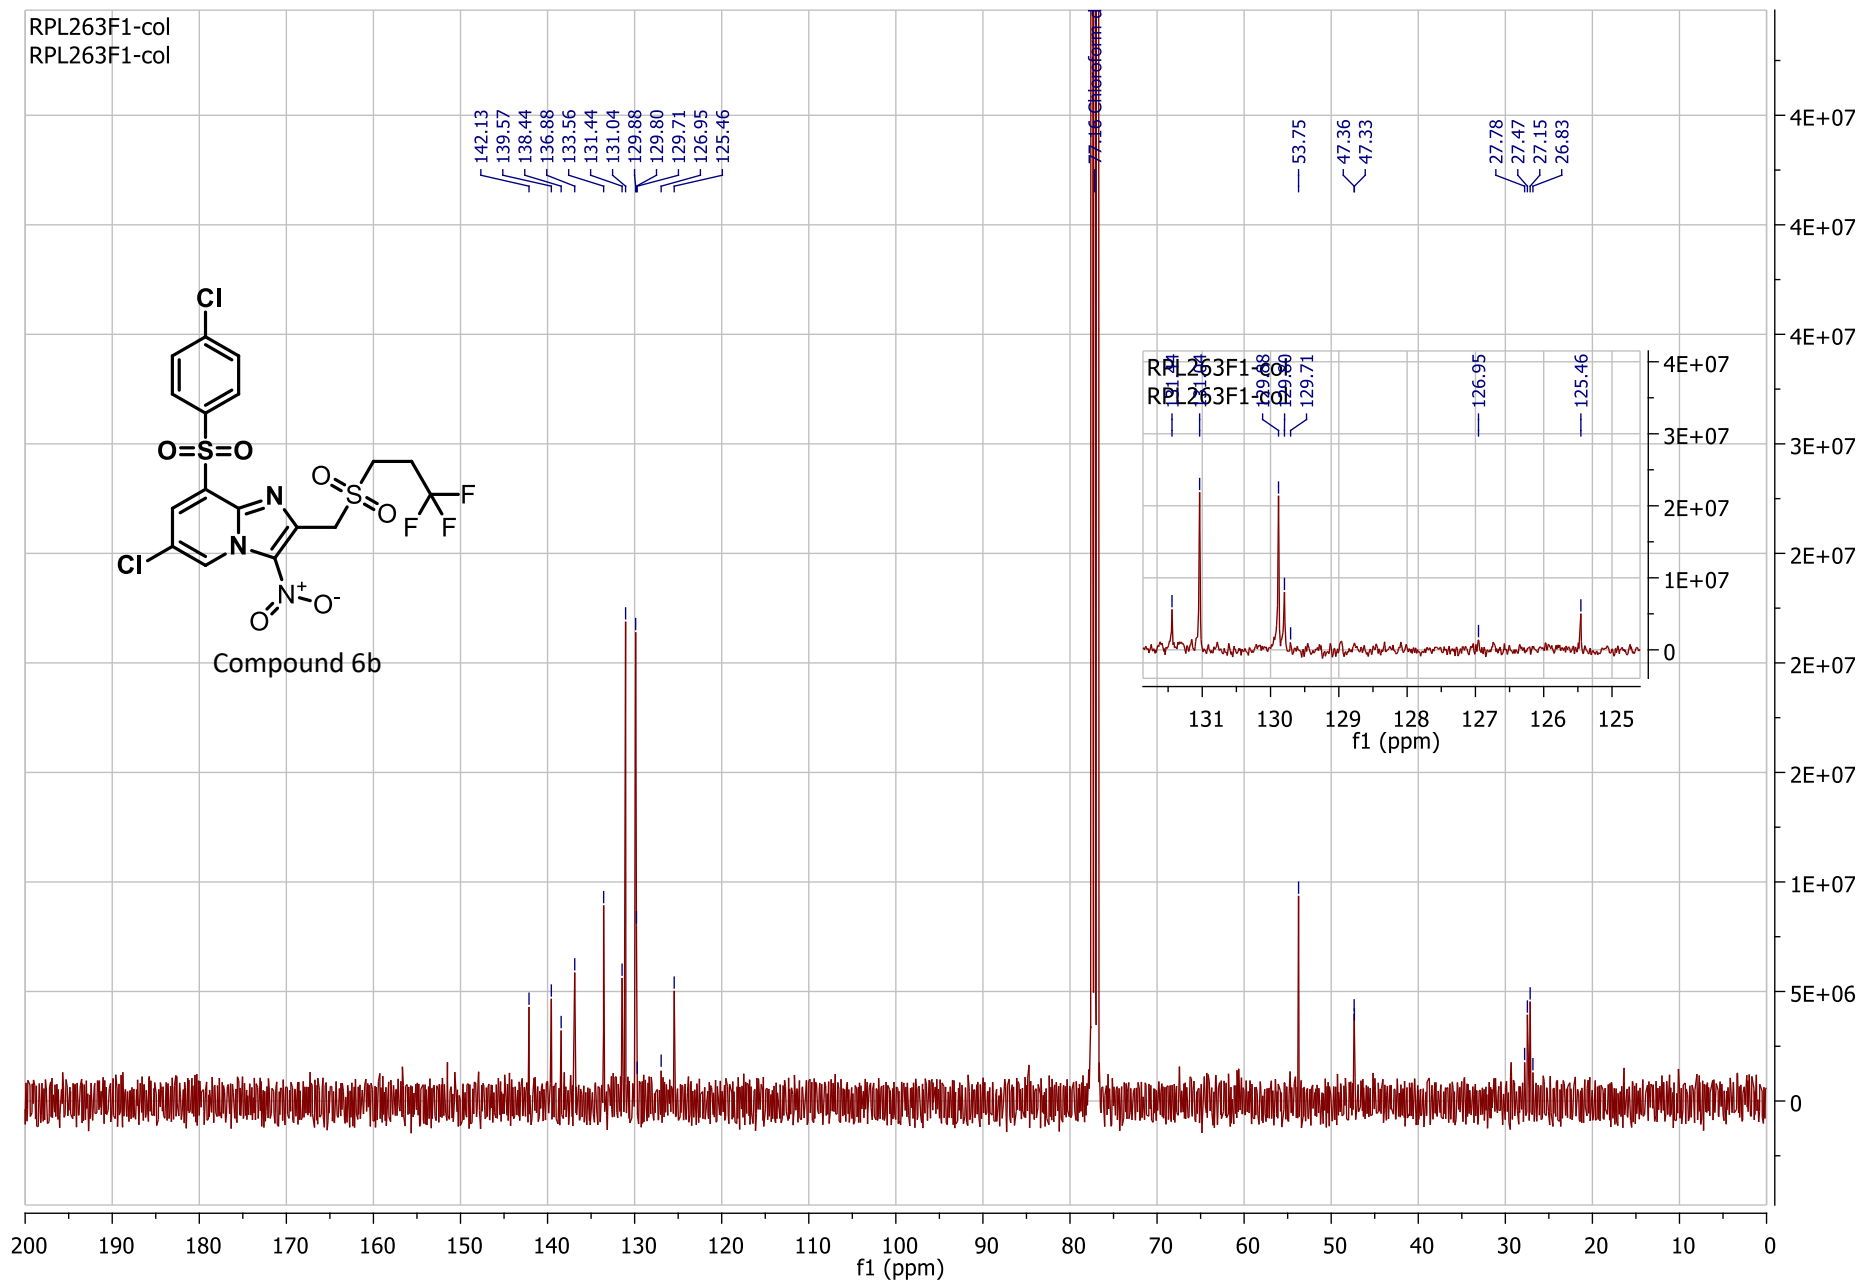

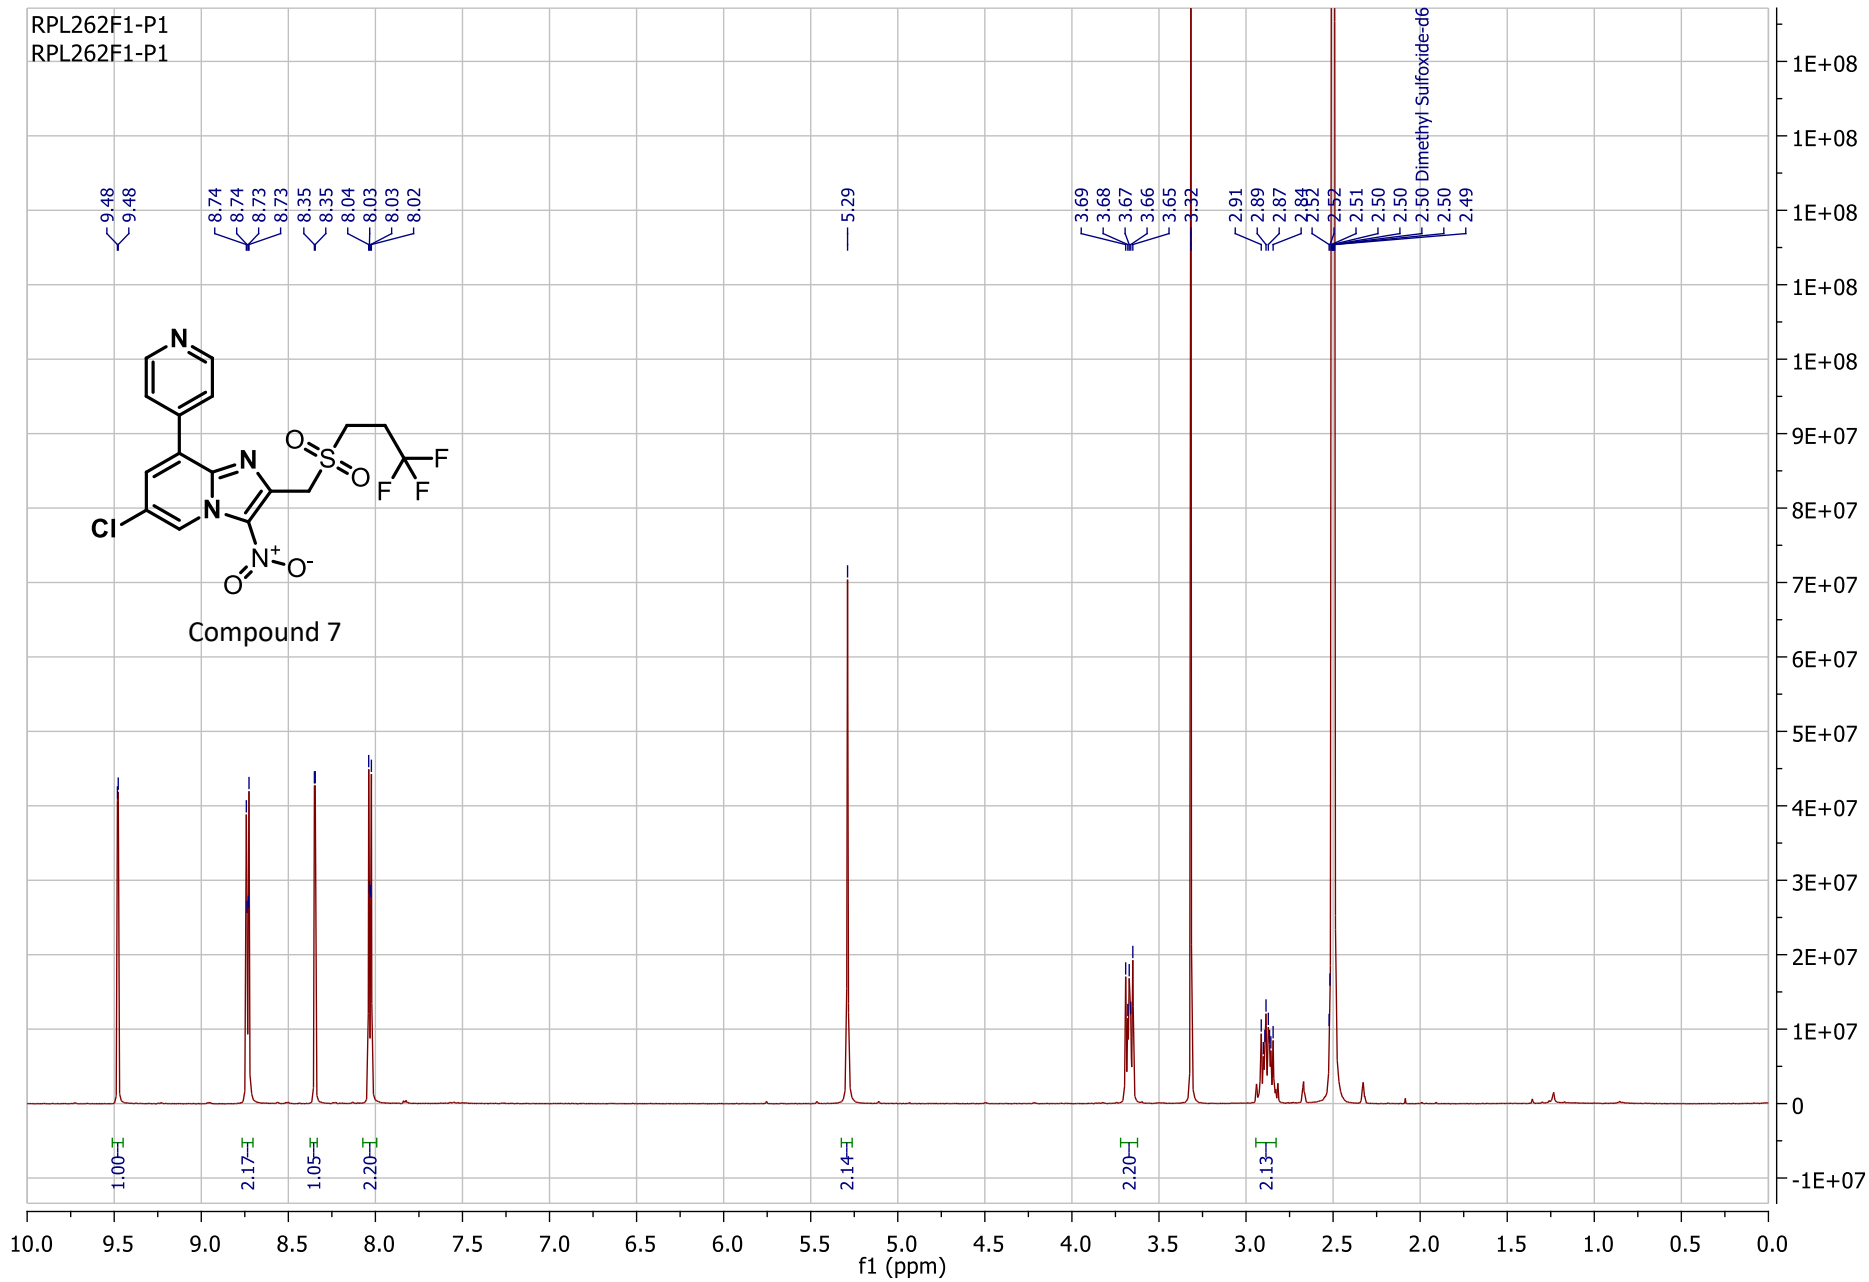

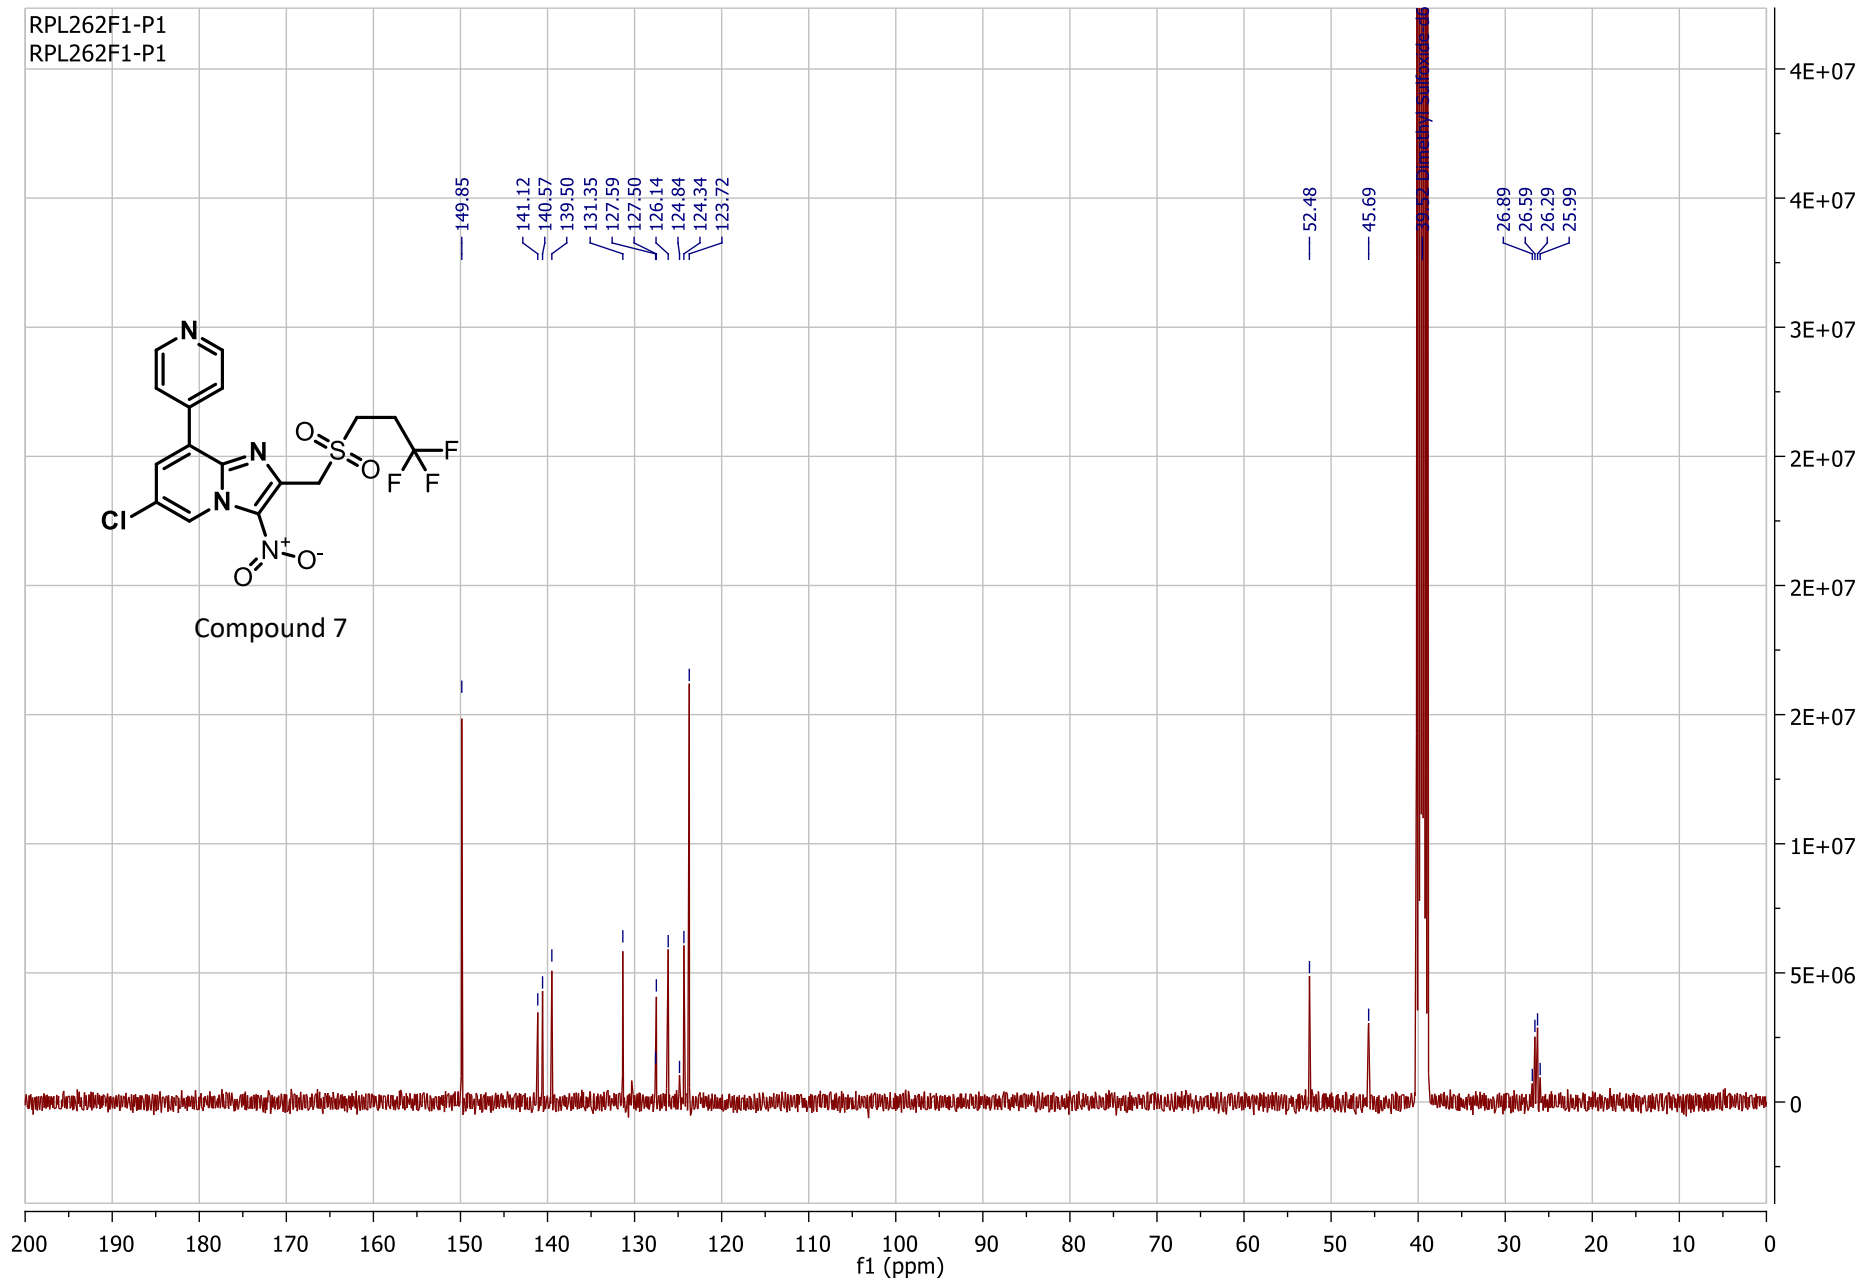

Supplement: s1 [file s1]
